# Supplementary material for: Investigating the anticancer potential of 4-phenylthiazole derived Ru(ii) and Os(ii) metalacycles
Source: Royal Society of Chemistry journal article supplement (doi:10.1039/d4dt00245h), 2024-01-01
Supplement: d4dt00245h1.pdf [file d4dt00245h1.pdf]

**Note after first publication:** *This document replaces the version originally published on 1st March, which had errors in Table S4.*

## Supporting Information

# Investigating the anticancer potential of 4-phenylthiazole derived Ru(II) and Os(II) metalacycles

Paul Getreuer,<sup>a,b</sup> Laura Marretta,<sup>c</sup> Emine Toyoglu,<sup>a</sup> Orsolya Dömötör,<sup>d</sup> Michaela Hejl,<sup>a</sup> Alexander Prado-Roller,<sup>a</sup> Klaudia Cseh,<sup>a</sup> Anton A. Legin,<sup>a</sup> Michael A. Jakupec,<sup>a,e</sup> Giampaolo Barone,<sup>c</sup> Alessio Terenzi,<sup>c</sup> Bernhard Keppler,<sup>a,e</sup> and Wolfgang Kandioller<sup>a,e,\*</sup>

<sup>a</sup>Institute of Inorganic Chemistry, Faculty of Chemistry, University of Vienna, Waehringer Straße 42, 1090 Vienna, Austria.

<sup>b</sup>Vienna Doctoral School in Chemistry (DoSChem), Faculty of Chemistry, University of Vienna, Waehringer Straße 42, 1090 Vienna, Austria.

<sup>c</sup>STEBICEF-Department, University of Palermo, Viale delle Scienze, Ed. 17, 90128 Palermo, Italy.

<sup>d</sup>Department of Molecular and Analytical Chemistry, University of Szeged, Dóm tér 7-8, 6720 Szeged, Hungary.

<sup>e</sup>Research Cluster "Translational Cancer Therapy Research", University of Vienna, Waehringer Straße 42, 1090 Vienna, Austria.

|                                                         |    |
|---------------------------------------------------------|----|
| 1. Synthesis of 4-phenylthiazole ligands (1a-e) .....   | 2  |
| 2. <sup>1</sup> H and <sup>13</sup> C NMR Spectra ..... | 3  |
| 3. Mass spectra.....                                    | 16 |
| 4. X-ray diffraction analysis.....                      | 26 |
| 5. Stability in aqueous solution .....                  | 34 |
| 6. MTT-Assays .....                                     | 39 |
| 7. G-quadruplex interaction studies .....               | 42 |
| 8. Amino acid interaction study.....                    | 51 |
| 9. Cell cycle investigation.....                        | 52 |
| 10. Apoptosis.....                                      | 55 |

## 1. Synthesis of 4-phenylthiazole ligands (1a-e)

**General procedure.** The general procedure was adapted from Lee *et al.*<sup>1</sup> 4-Bromothiazole (1.0 eq.), the respective boronic acid or boronic ester (1.5 eq.) and  $K_2CO_3$  (2.0 eq.) were suspended in a 3:1 dioxane/ $H_2O$  mixture (8 mL) and degassed with Ar. Subsequently, tetrakis(triphenylphosphine)Pd(0) (0.02 eq.) was added and the mixture was heated to 100 °C in a sealed vial. After TLC showed full conversion the mixture was partitioned between  $H_2O$  and EtOAc and the aqueous layer was further extracted with EtOAc (2x). The combined organic extracts were washed with brine, dried over  $Na_2SO_4$ , filtered and concentrated under reduced pressure. After purification *via* column chromatography and drying for 2 days at room temperature *in vacuo*, the respective 4-phenylthiazole was obtained in elemental analysis purity.

**4-Phenylthiazole (1a).** The reaction was performed according to the general procedure, using 4-bromothiazole (984 mg, 6 mmol), 4,4,5,5-tetramethyl-2-phenyl-1,3,2-dioxaborolane (1.837 g, 9 mmol),  $K_2CO_3$  (1.658 g, 12 mmol) and tetrakis(triphenylphosphine)Pd(0) (139 mg, 120  $\mu$ mol) with a reaction time of 21 h (5% EtOAc in *n*-hexane, 867 mg, 89% yield). Elemental analysis found (calculated) for  $C_9H_7NS$ : C 66.71 (67.05), H 4.25 (4.38), N 8.65 (8.69), S 20.10 (19.89), O <0.05 (0.00).  $^1H$  NMR (500.10 MHz,  $CDCl_3$ ):  $\delta$  = 8.89 (d,  $^4J_{H,H}$  = 2 Hz, 1H, ArH<sub>Th-2</sub>), 7.94 (ddd,  $^3J_{H,H}$  = 8.2,  $^4J_{H,H}$  = 1.6 Hz, 2H, ArH<sub>Ph-2, Ph-6</sub>), 7.55 (d,  $^4J_{H,H}$  = 2.0 Hz, 1H, ArH<sub>Th-5</sub>), 7.47–7.42 (m, 2H, ArH<sub>Ph-3, Ph-5</sub>), 7.39–7.33 (m, 1H, ArH<sub>Ph-4</sub>) ppm.

**4-(4-Fluorophenyl)thiazole (1b).** The reaction was performed according to the general procedure, using 4-bromothiazole (984 mg, 6 mmol), (4-fluorophenyl)boronic acid (1.260 g, 9 mmol),  $K_2CO_3$  (1.658 g, 12 mmol) and tetrakis(triphenylphosphine)Pd(0) (139 mg, 120  $\mu$ mol) with a reaction time of 23 h (5% EtOAc in *n*-hexane, 454 mg, 42% yield). Elemental analysis found (calculated) for  $C_9H_6FNS$ : C 60.24 (60.32), H 3.41 (3.37), N 7.57 (7.82), S 17.84 (17.89), O 0.21 (0.00).  $^1H$  NMR (500.10 MHz,  $CDCl_3$ ):  $\delta$  = 8.87 (d,  $^4J_{H,H}$  = 2 Hz, 1H, ArH<sub>Th-2</sub>), 7.98–7.85 (m, 2H, ArH<sub>Ph-2, Ph-6</sub>), 7.48 (d,  $^4J_{H,H}$  = 2 Hz, 1H, ArH<sub>Th-5</sub>), 7.18–7.07 (m, 2H, ArH<sub>Ph-3, Ph-5</sub>) ppm.

**4-(4-(Methylsulfonyl)phenyl)thiazole (1c).** The reaction was performed according to the general procedure, using 4-bromothiazole (984 mg, 6 mmol), (4-(methylsulfonyl)phenyl)boronic acid (1.800 g, 9 mmol),  $K_2CO_3$  (1.658 g, 12 mmol) and tetrakis(triphenylphosphine)Pd(0) (139 mg, 120  $\mu$ mol) with a reaction time of 23 h (40-50% EtOAc in *n*-hexane, 925 mg, 64% yield). Elemental analysis found (calculated) for  $C_{10}H_9NO_2S_2 \cdot 0.10 H_2O$ : C 49.78 (49.81), H 3.72 (3.85), N 5.62 (5.81), S 26.66 (26.60), O 13.59 (13.93).  $^1H$  NMR (500.10 MHz,  $CDCl_3$ ):  $\delta$  = 8.93 (d,  $^4J_{H,H}$  = 2 Hz, 1H, ArH<sub>Th-2</sub>), 8.16–8.13 (m, 2H, ArH<sub>Ph-2, Ph-6</sub>), 8.04–7.98 (m, 2H, ArH<sub>Ph-3, Ph-5</sub>), 7.74 (d,  $^4J_{H,H}$  = 2 Hz, 1H, ArH<sub>Th-5</sub>), 3.09 (s, 3H,  $CH_3$ ) ppm.

**4-(4-Methylphenyl)thiazole (1d).** The reaction was performed according to the general procedure, using 4-bromothiazole (984 mg, 6 mmol), 4,4,5,5-tetramethyl-2-(4-methylphenyl)-1,3,2-dioxaborolane (1.963 g, 9 mmol),  $K_2CO_3$  (1.658 g, 12 mmol) and tetrakis(triphenylphosphine)Pd(0) (139 mg, 120  $\mu$ mol) with a reaction time of 23 h (5% EtOAc in *n*-hexane, 902 mg, 86% yield). Elemental analysis found (calculated) for  $C_{10}H_9NS$ : C 68.18 (68.54), H 5.09 (5.18), N 7.89 (7.99), S 18.48 (18.29), O <0.05 (0.00).  $^1H$  NMR (500.10 MHz,  $CDCl_3$ ):  $\delta$  = 8.87 (d,  $^4J_{H,H}$  = 2 Hz, 1H, ArH<sub>Th-2</sub>), 7.83 (d,  $^3J_{H,H}$  = 8 Hz, 2H, ArH<sub>Ph-2, Ph-6</sub>), 7.48 (d,  $^4J_{H,H}$  = 2 Hz, 1H, ArH<sub>Th-5</sub>), 7.26–7.24 (m, 2H, ArH<sub>Ph-3, Ph-5</sub>), 2.39 (s, 3H,  $CH_3$ ) ppm.

**4-(4-Methoxyphenyl)thiazole (1e).** The reaction was performed according to the general procedure, using 4-bromothiazole (984 mg, 6 mmol), 2-(4-methoxyphenyl)-4,4,5,5-tetramethyl-1,3,2-dioxaborolane (2.107 g, 9 mmol),  $K_2CO_3$  (1.658 g, 12 mmol) and tetrakis(triphenylphosphine)Pd(0) (139 mg, 120  $\mu$ mol) with a reaction time of 23 h (10% EtOAc in *n*-hexane, 998 mg, 87% yield). Elemental analysis found (calculated) for  $C_{10}H_9NOS$ : C 62.57 (62.80), H 4.67 (4.74), N 7.28 (7.32), S 16.85 (16.76), O 8.42 (8.37).  $^1H$  NMR (500.10 MHz,  $CDCl_3$ ):  $\delta$  = 8.86 (d,  $^4J_{H,H}$  = 2 Hz, 1H, ArH<sub>Th-2</sub>), 7.91–7.84 (m, 2H, ArH<sub>Ph-2, Ph-6</sub>), 7.40 (d,  $^4J_{H,H}$  = 2.0 Hz, 1H, ArH<sub>Th-5</sub>), 7.00–6.94 (m, 2H, ArH<sub>Ph-3, Ph-5</sub>), 3.86 (s, 3H,  $CH_3$ ) ppm.

## 2. $^1\text{H}$ and $^{13}\text{C}$ NMR Spectra

### 4-Phenylthiazole (1a)

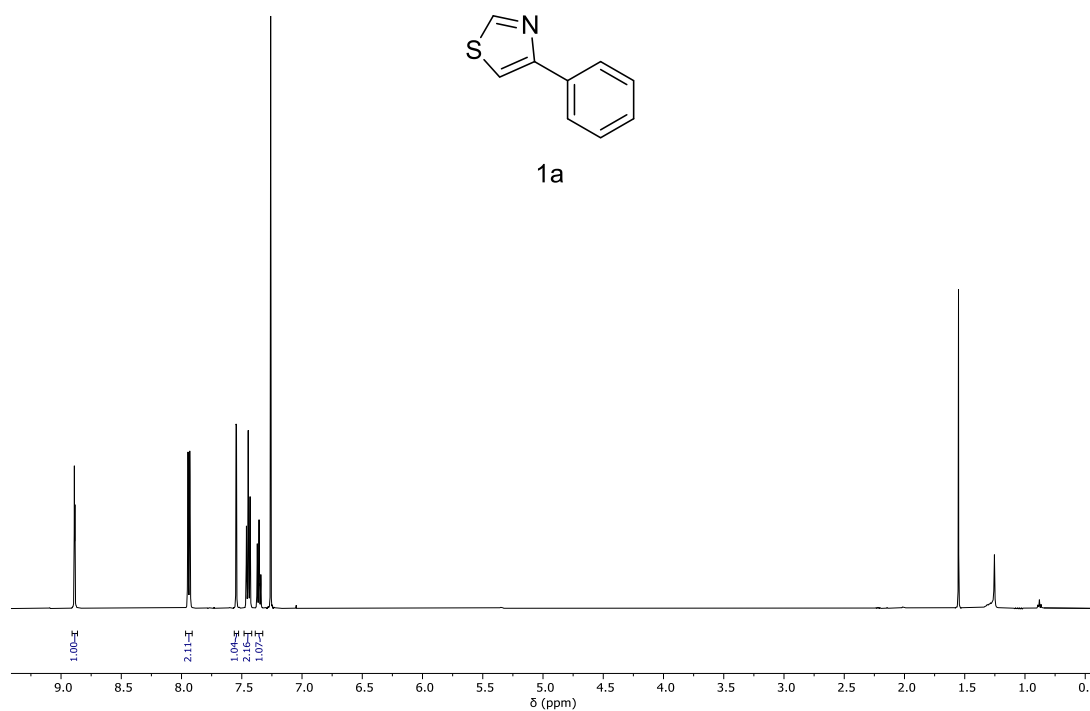

Figure S1:  $^1\text{H}$  NMR of 1a in  $\text{CDCl}_3$ .

### 4-(4-Fluorophenyl)thiazole (1b)

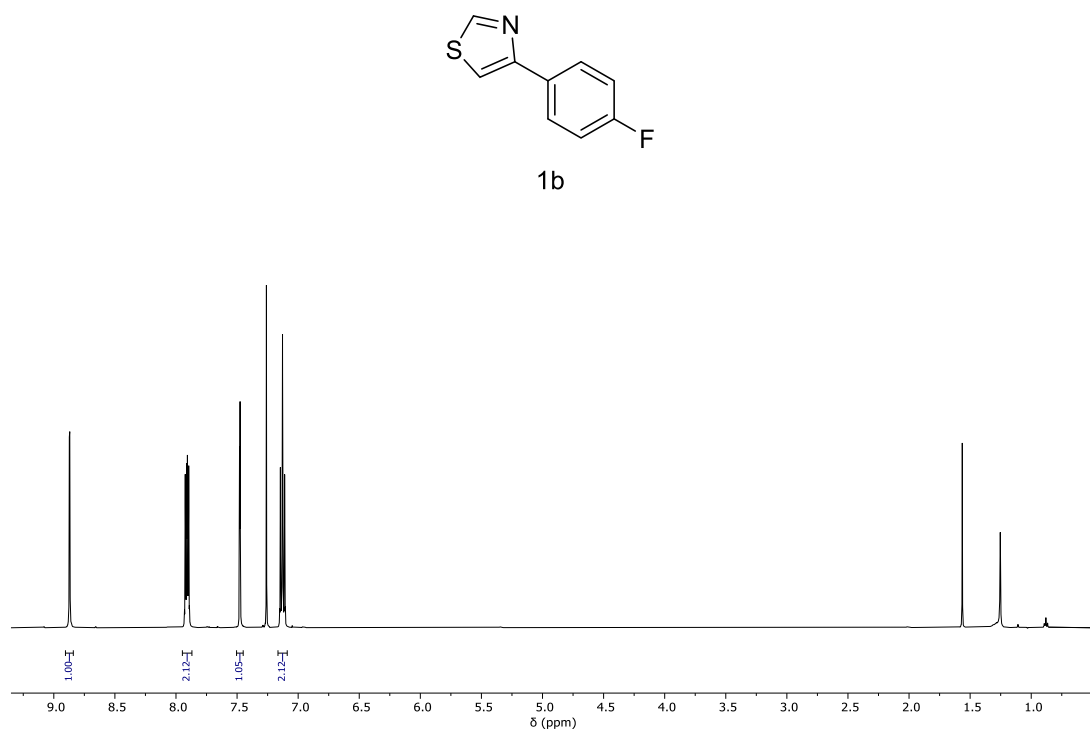

Figure S2:  $^1\text{H}$  NMR of 1b in  $\text{CDCl}_3$ .

### 4-(4-(Methylsulfonyl)phenyl)thiazole (1c)

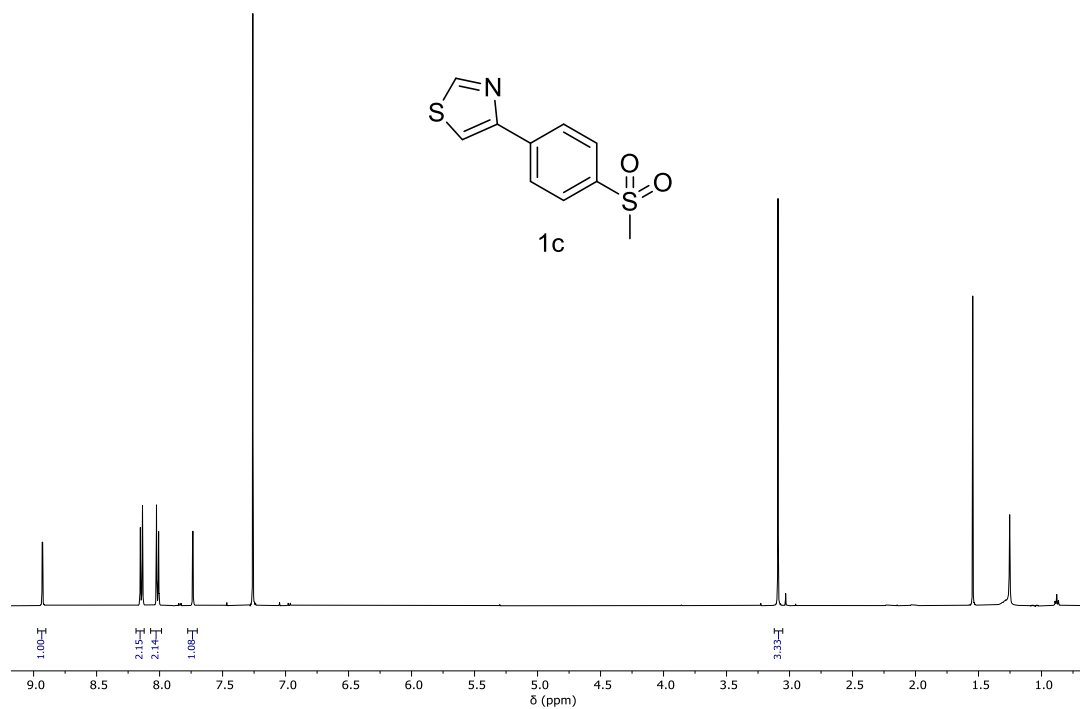

Figure S3: <sup>1</sup>H NMR of 1c in CDCl<sub>3</sub>.

### 4-(4-Methylphenyl)thiazole (1d)

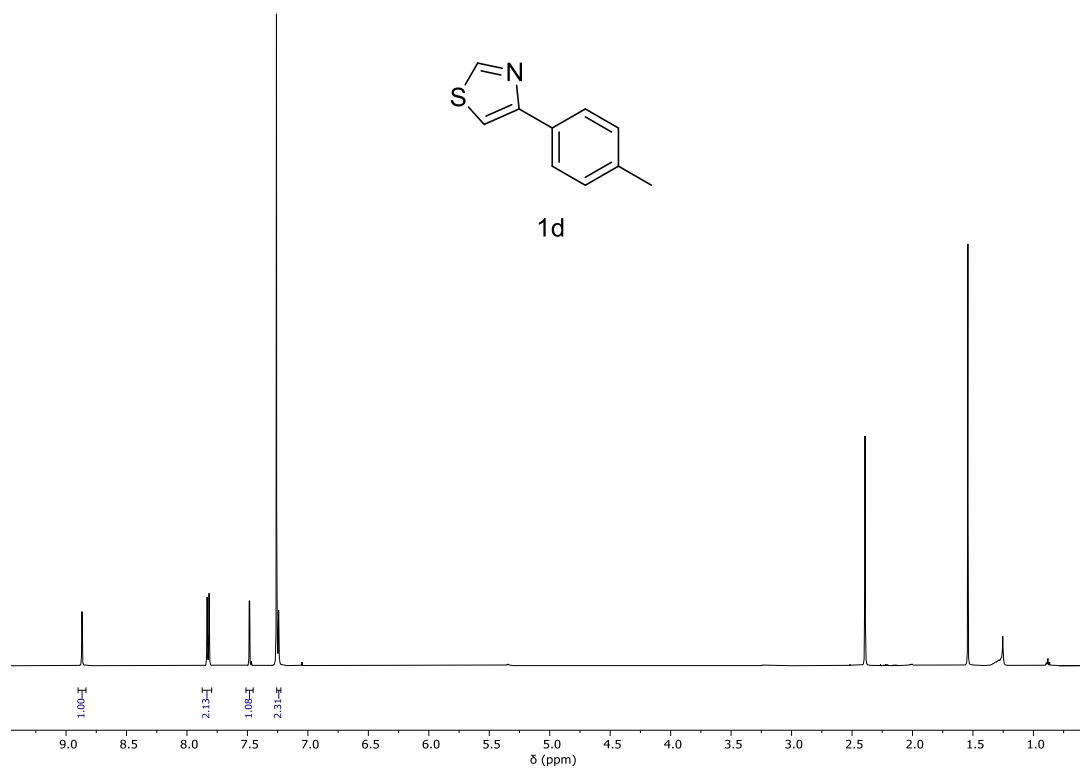

Figure S4: <sup>1</sup>H NMR of 1d in CDCl<sub>3</sub>.

### 4-(4-Methoxyphenyl)thiazole (1e)

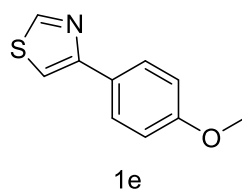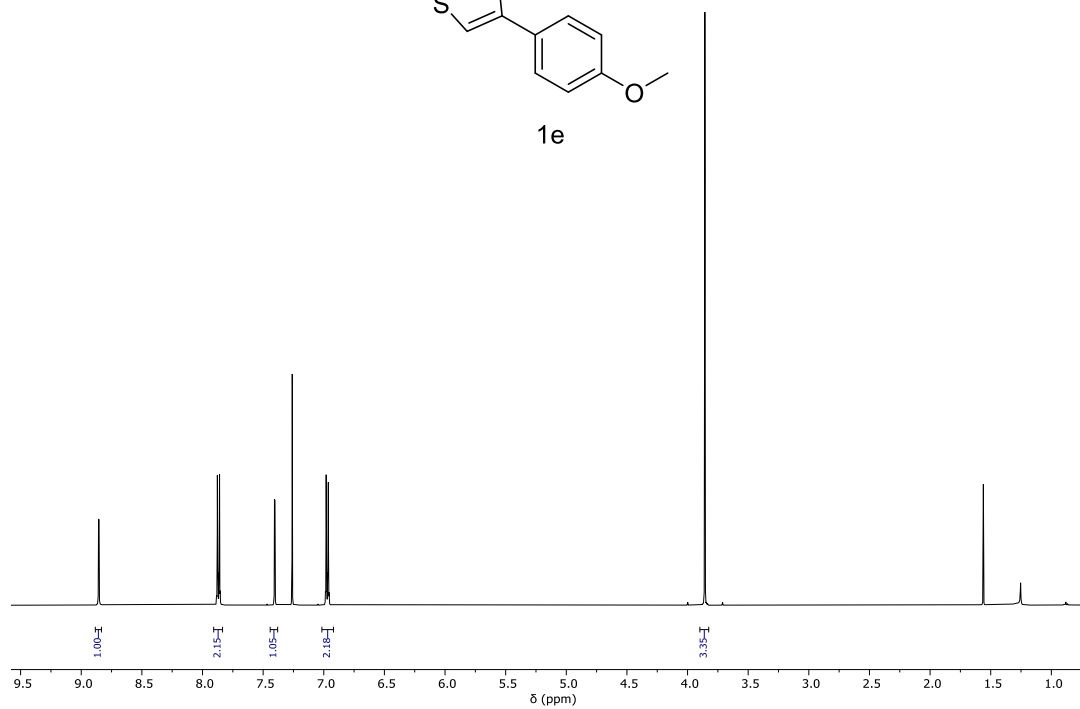

Figure S5: <sup>1</sup>H NMR of 1e in CDCl<sub>3</sub>.

**[(Chlorido)(4-phenylthiazolato-κN,κC2′)(η<sup>6</sup>-*p*-cymene)ruthenium(II)] (2a)**

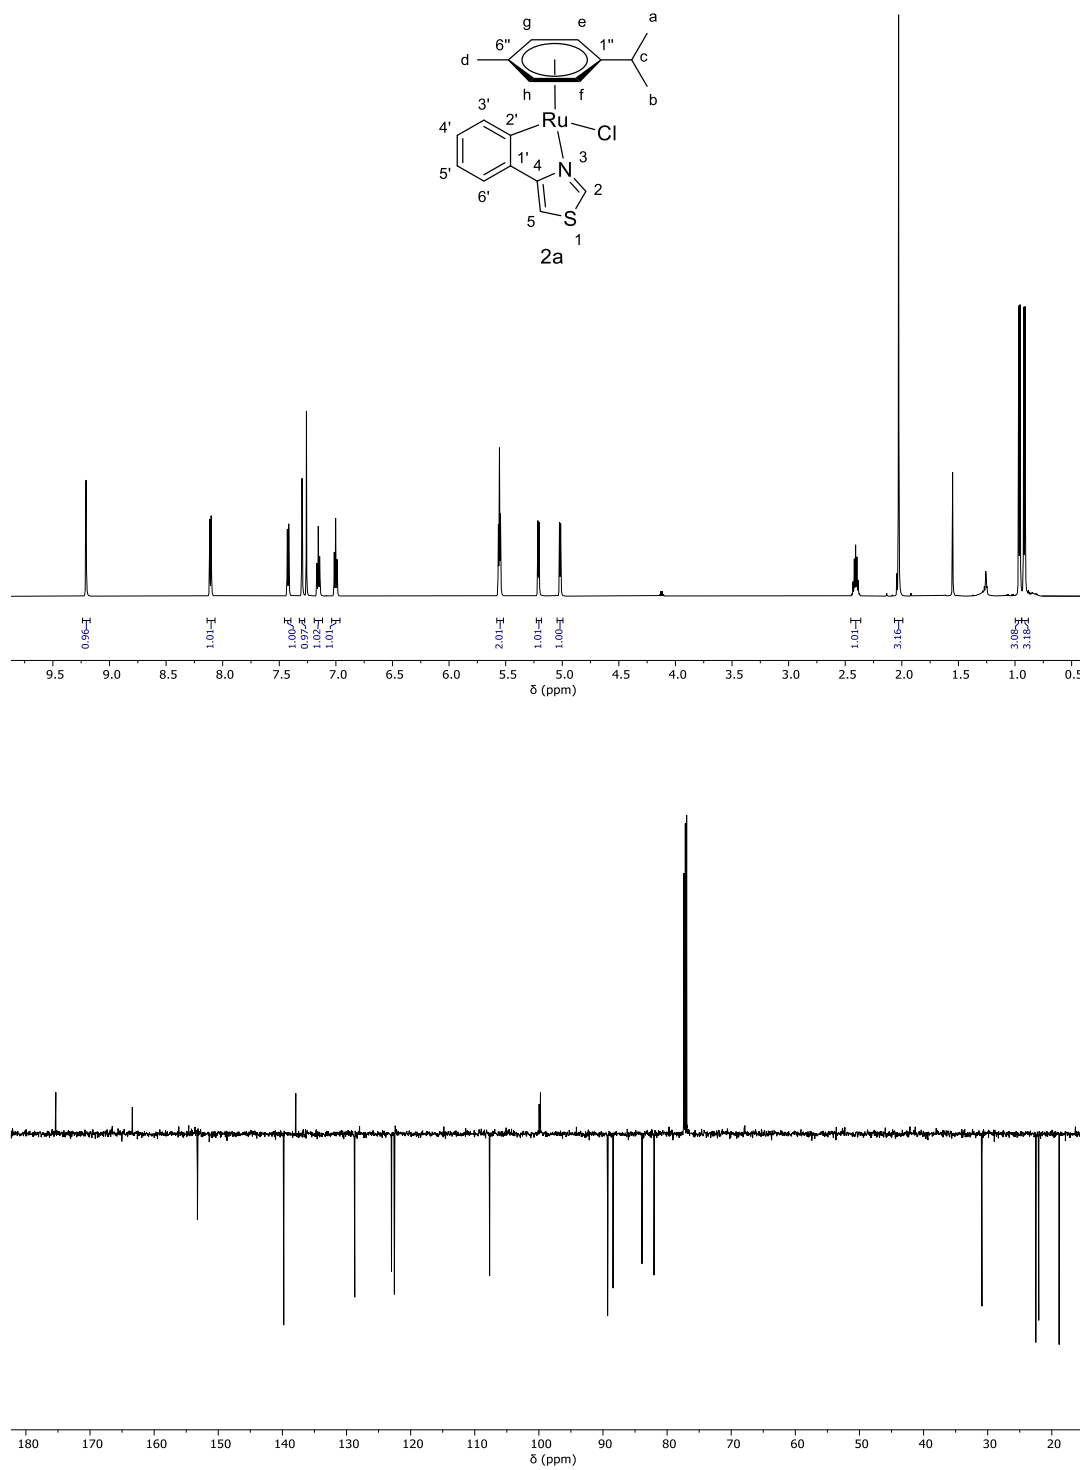

**Figure S6:** Atom numbering (above), <sup>1</sup>H (center) and <sup>13</sup>C (below) NMR of 2a in CDCl<sub>3</sub>.

**[(Chlorido)(4-(4-fluorophenyl)thiazolato-κN,κC2')(η<sup>6</sup>-*p*-cymene)ruthenium(II)] (2b)**

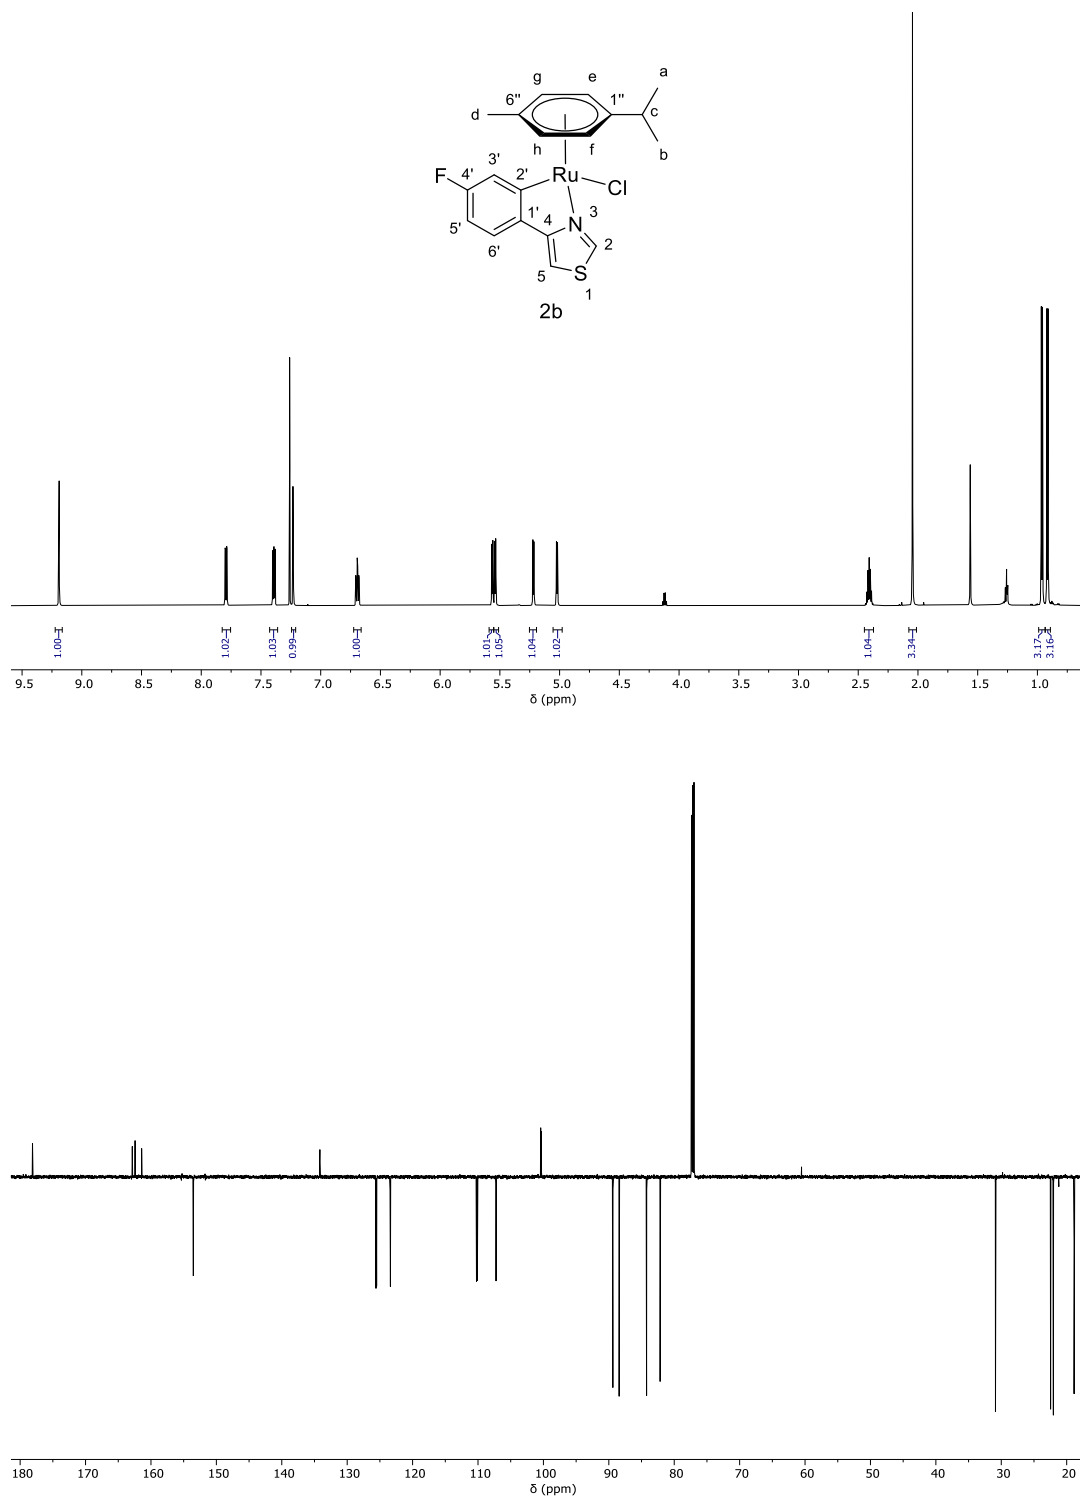

**Figure S7:** Atom numbering (above), <sup>1</sup>H (center) and <sup>13</sup>C (below) NMR of **2b** in CDCl<sub>3</sub>.

**[(Chlorido)(4-(4-(methylsulfonyl)phenyl)thiazolato-κN,κC2')(η<sup>6</sup>-p-cymene)ruthenium(II)]  
(2c)**

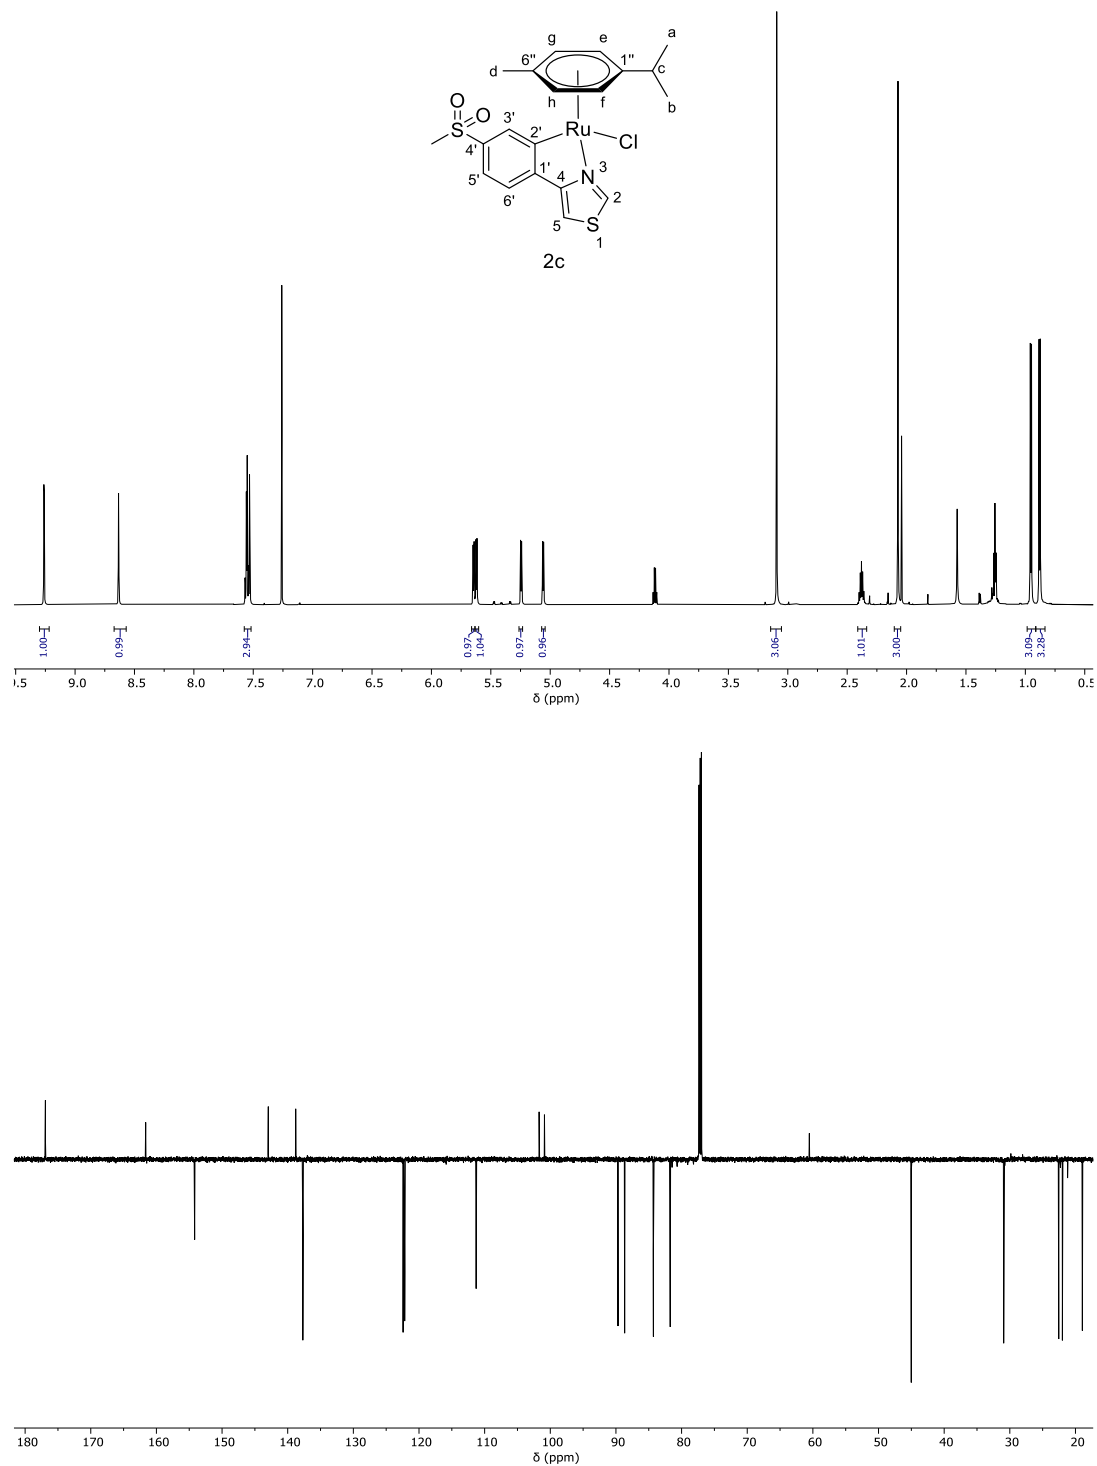

**Figure S8:** Atom numbering (above), <sup>1</sup>H (center) and <sup>13</sup>C (below) NMR of **2c** in CDCl<sub>3</sub>.



**[(Chlorido)(4-(4-methylphenyl)thiazolato-κN,κC2')(η<sup>6</sup>-p-cymene)ruthenium(II)] (2d)**

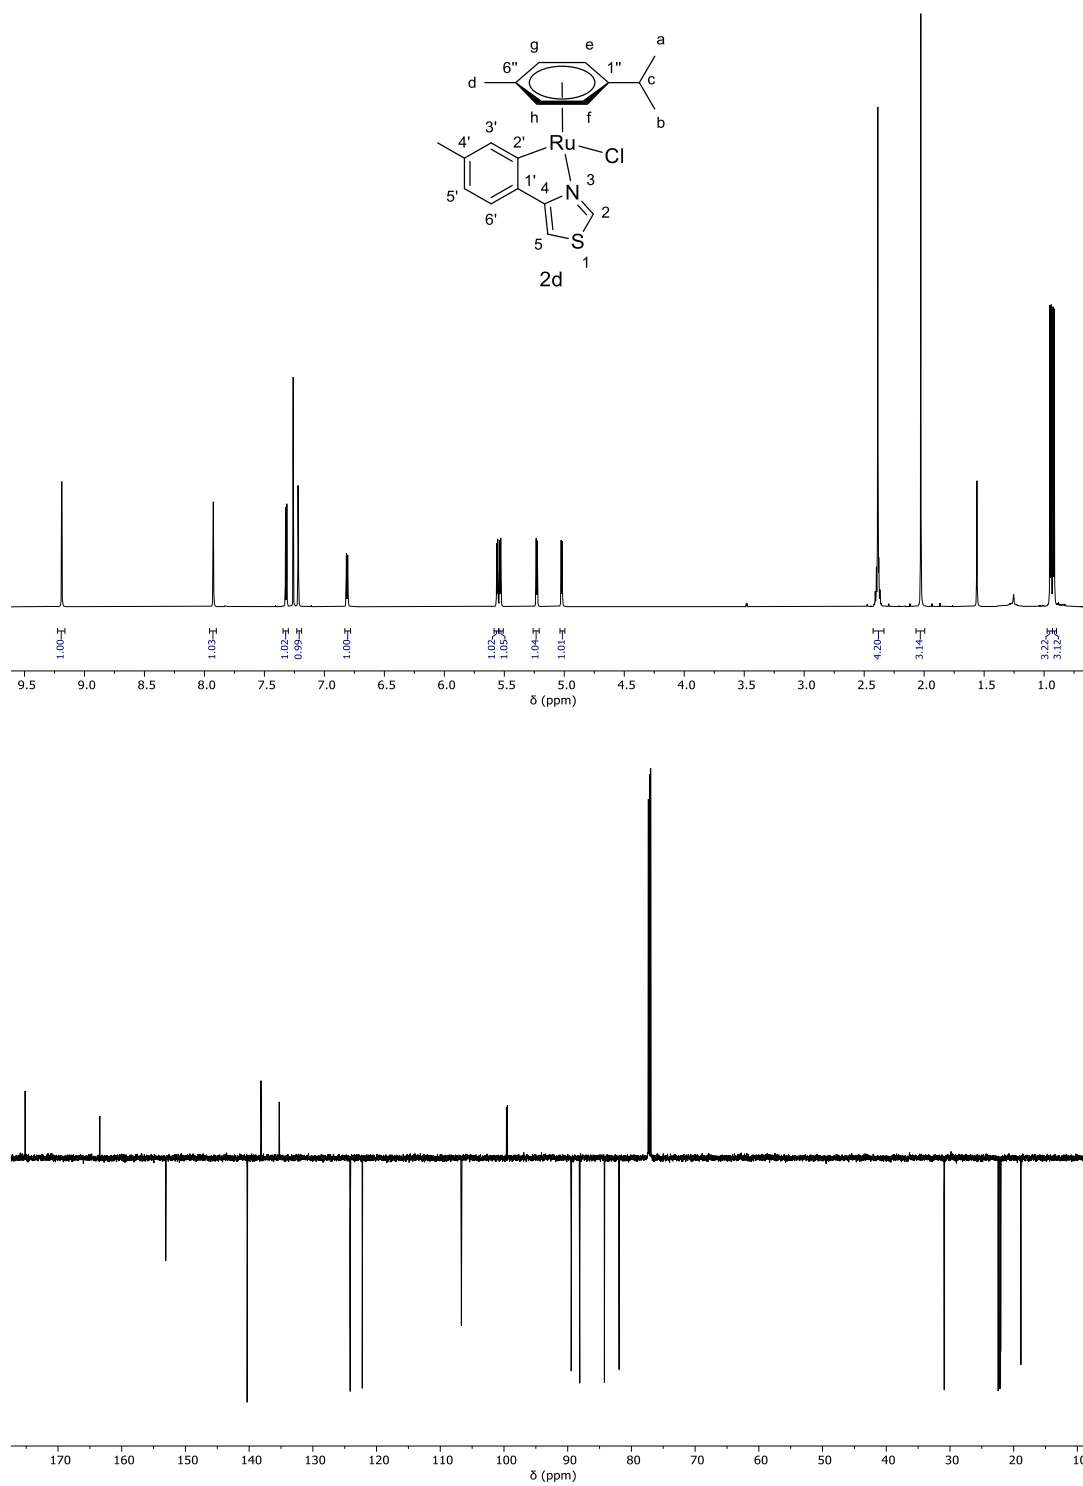

**Figure S9:** Atom numbering (above), <sup>1</sup>H (center) and <sup>13</sup>C (below) NMR of 2d in CDCl<sub>3</sub>.

**[(Chlorido)(4-(4-methoxyphenyl)thiazolato-κN,κC2')(η<sup>6</sup>-*p*-cymene)ruthenium(II)] (2e)**

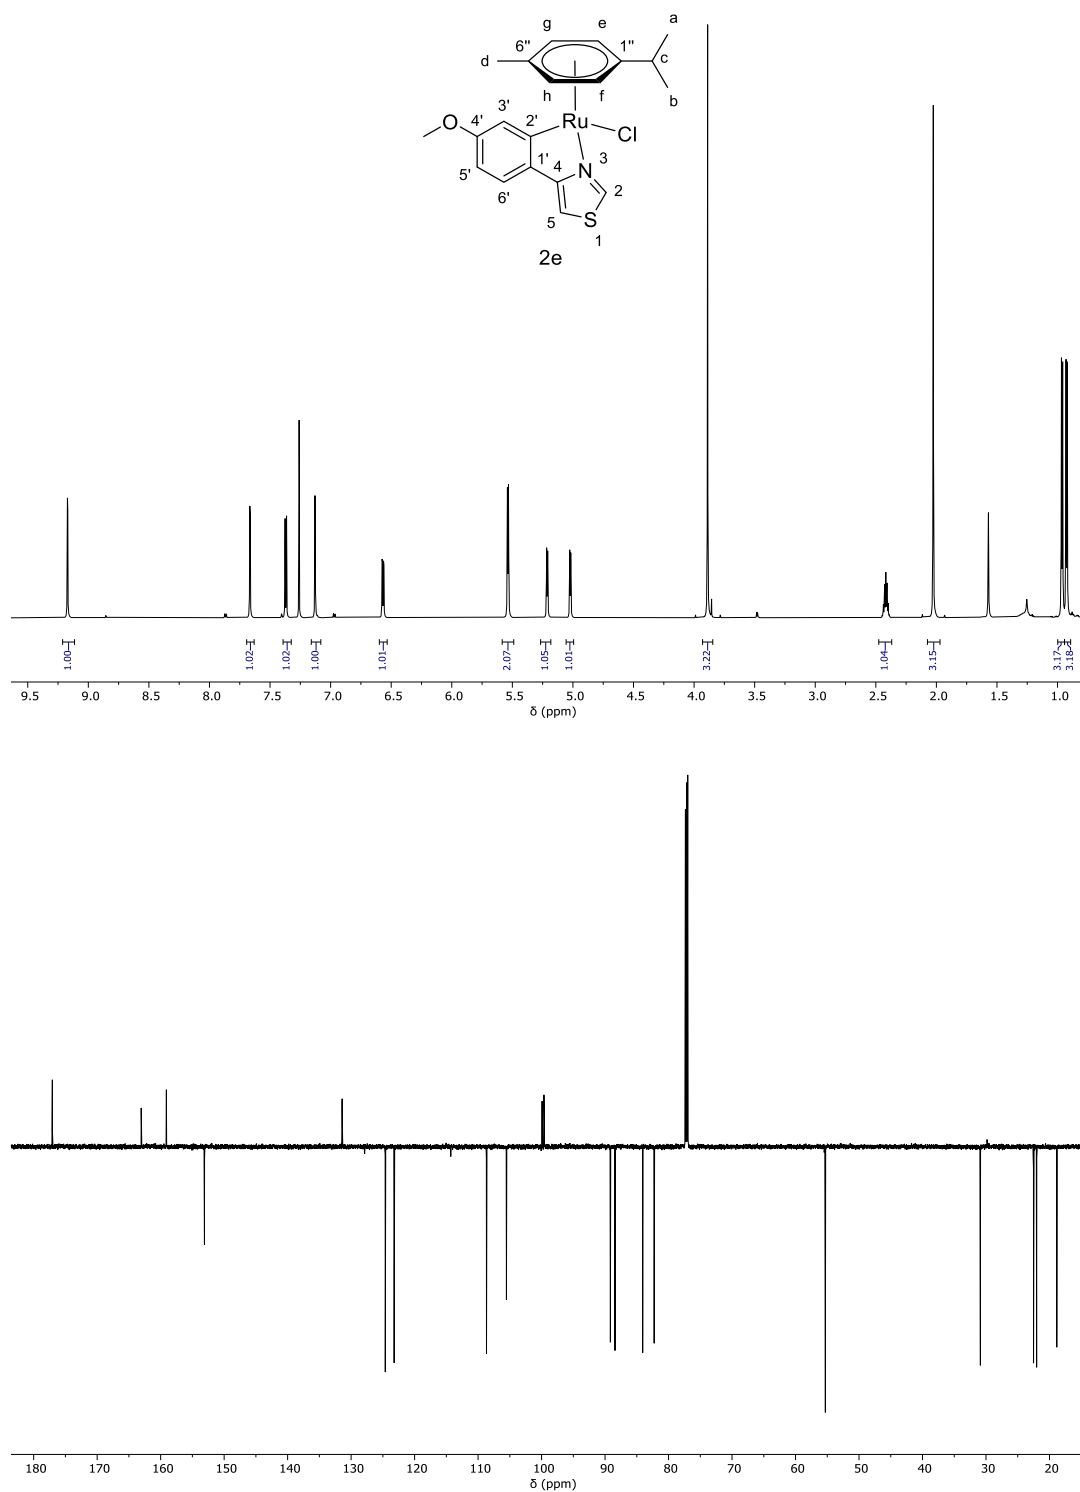

**Figure S10:** Atom numbering (above), <sup>1</sup>H (center) and <sup>13</sup>C (below) NMR of **2e** in CDCl<sub>3</sub>.

**[(Chlorido)(4-phenylthiazolato-κN,κC2′)(η<sup>6</sup>-p-cymene)osmium(II)] (3a)**

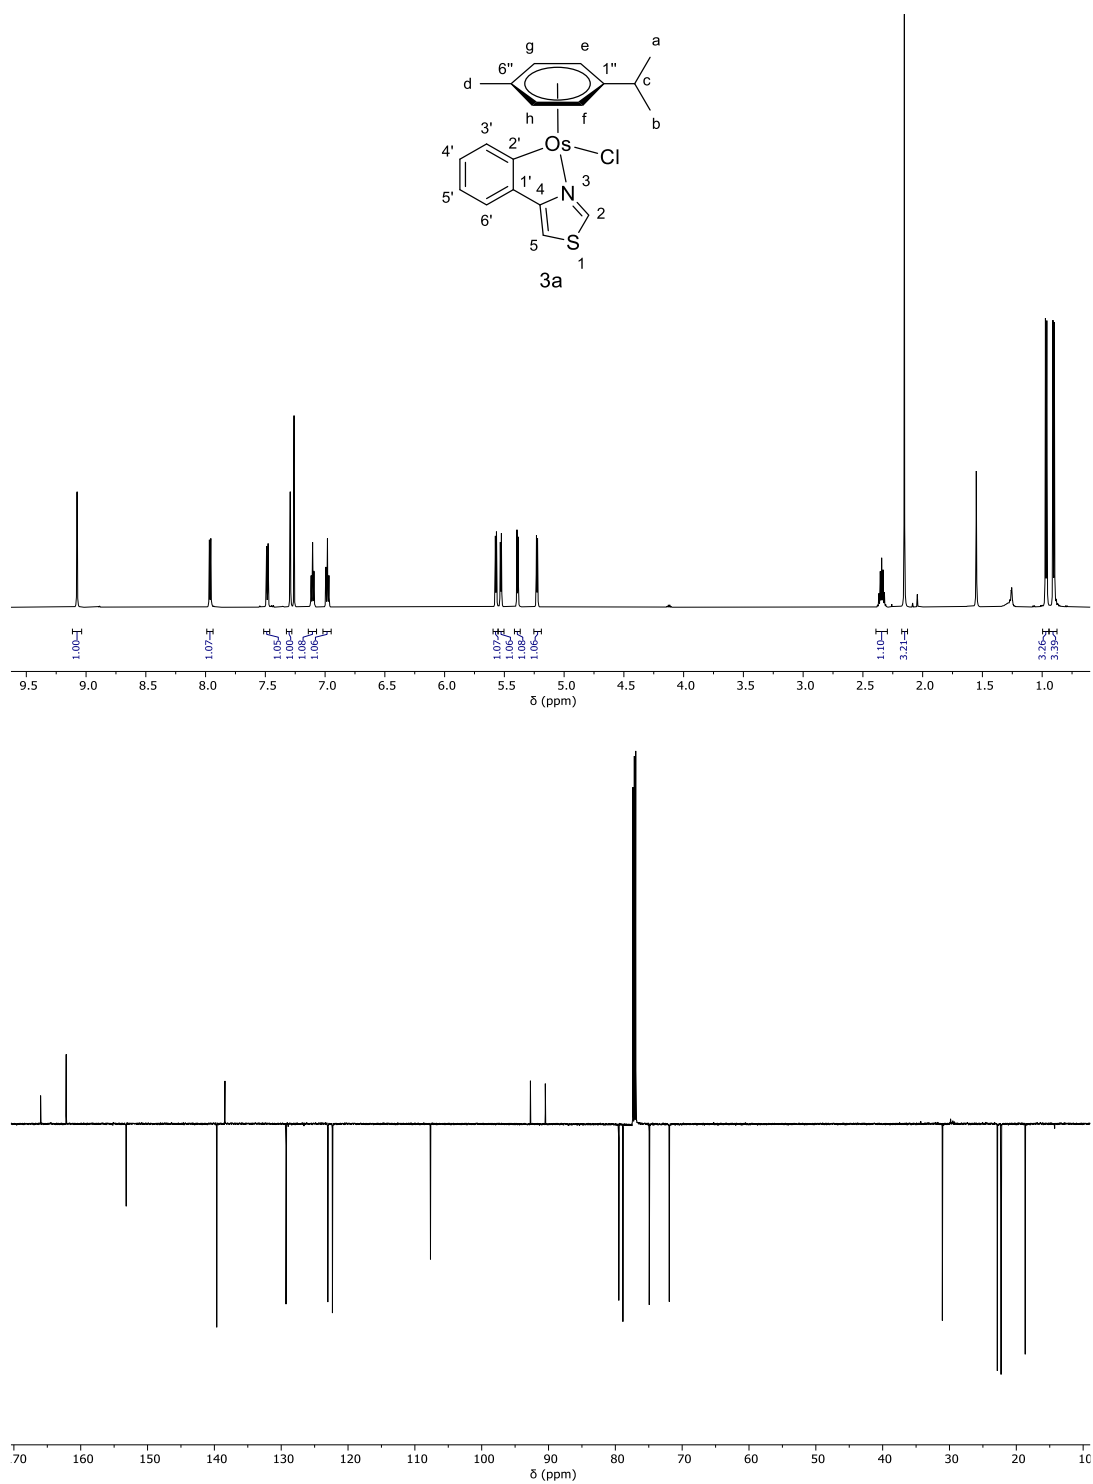

**Figure S11:** Atom numbering (above), <sup>1</sup>H (center) and <sup>13</sup>C (below) NMR of 3a in CDCl<sub>3</sub>.

**[(Chlorido)(4-(4-fluorophenyl)thiazolato-κN,κC2')(η<sup>6</sup>-p-cymene)osmium(II)] (3b)**

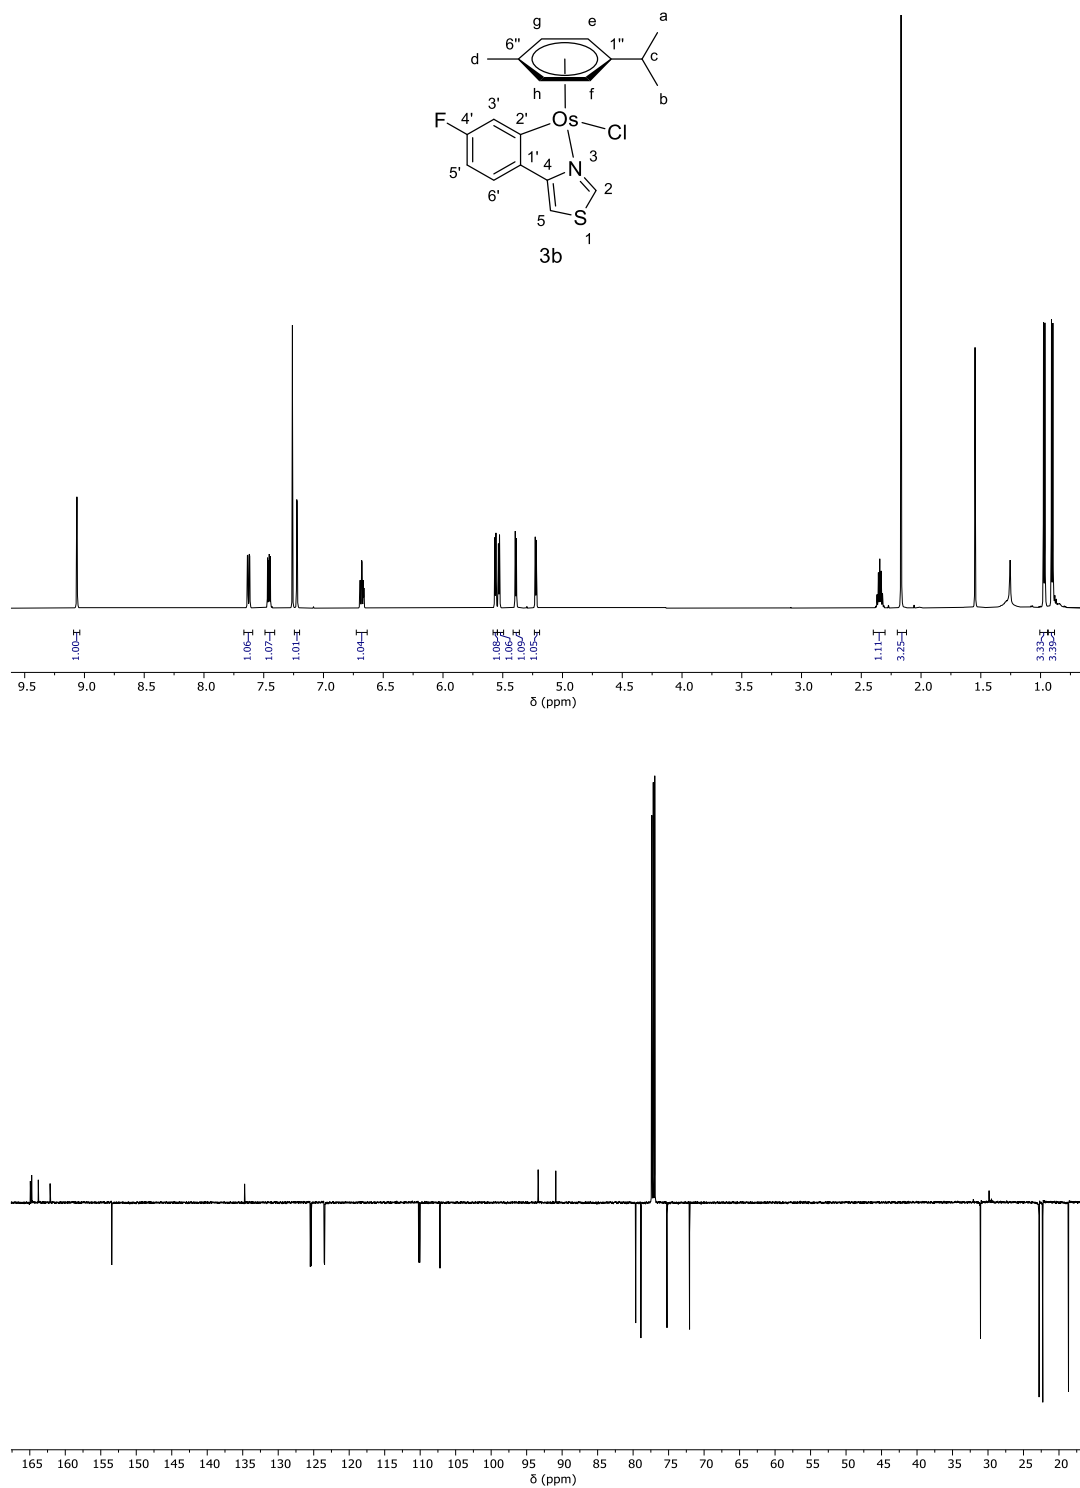

**Figure S12:** Atom numbering (above), <sup>1</sup>H (center) and <sup>13</sup>C (below) NMR of **3b** in CDCl<sub>3</sub>.

**[(Chlorido)(4-(4-(methylsulfonyl)phenyl)thiazolato-κN,κC2')(η<sup>6</sup>-p-cymene)osmium(II)] (3c)**

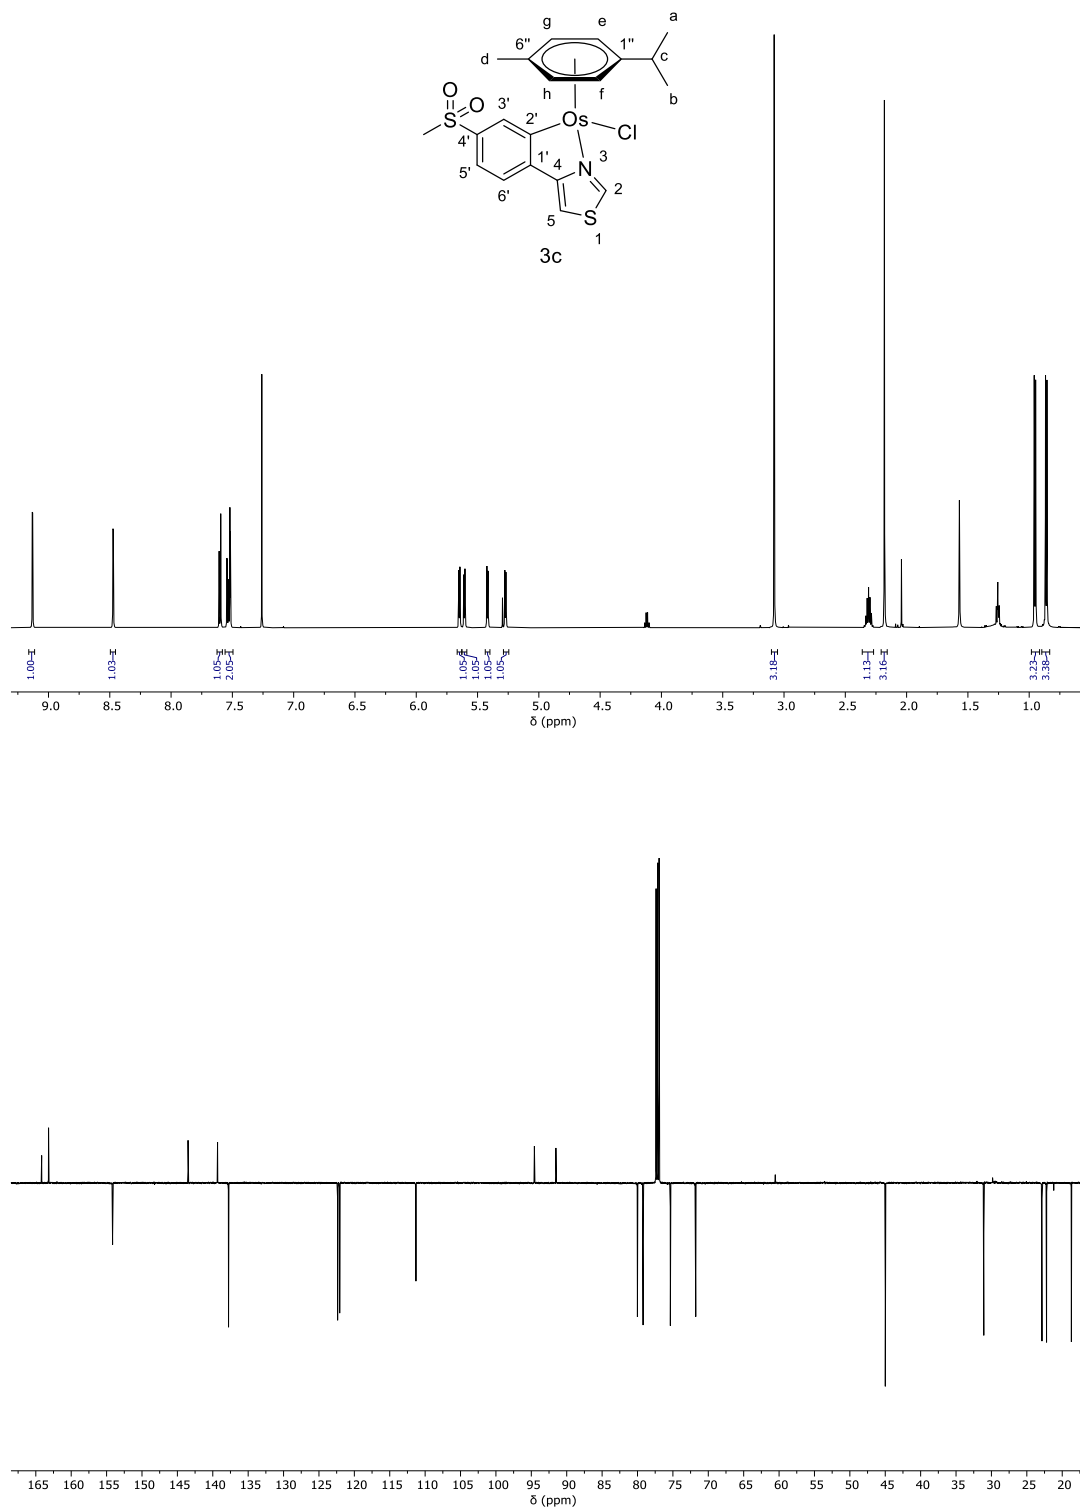

**Figure S13:** Atom numbering (above), <sup>1</sup>H (center) and <sup>13</sup>C (below) NMR of 3c in CDCl<sub>3</sub>.

**[(Chlorido)(4-(4-methylphenyl)thiazolato-κN,κC2')(η<sup>6</sup>-p-cymene)osmium(II)] (3d)**

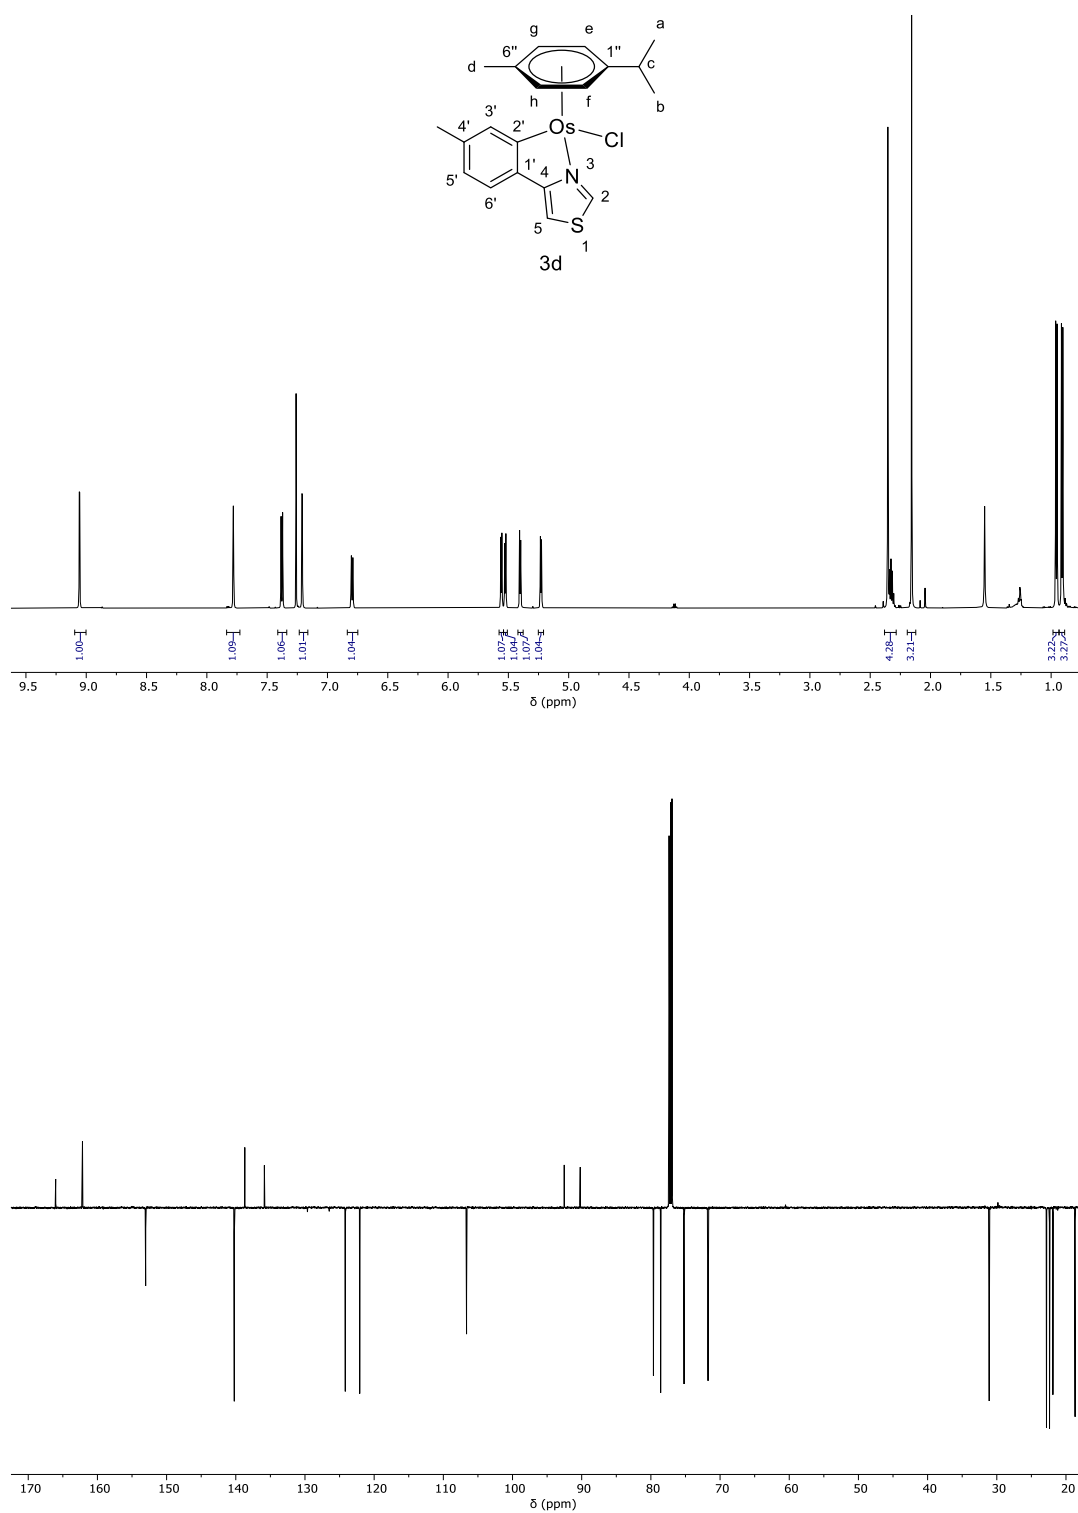

**Figure S14:** Atom numbering (above), <sup>1</sup>H (center) and <sup>13</sup>C (below) NMR of 3d in CDCl<sub>3</sub>.

**[(Chlorido)(4-(4-methoxyphenyl)thiazolato- $\kappa$ N, $\kappa$ C2')]( $\eta^6$ -*p*-cymene)osmium(II)] (**3e**)**

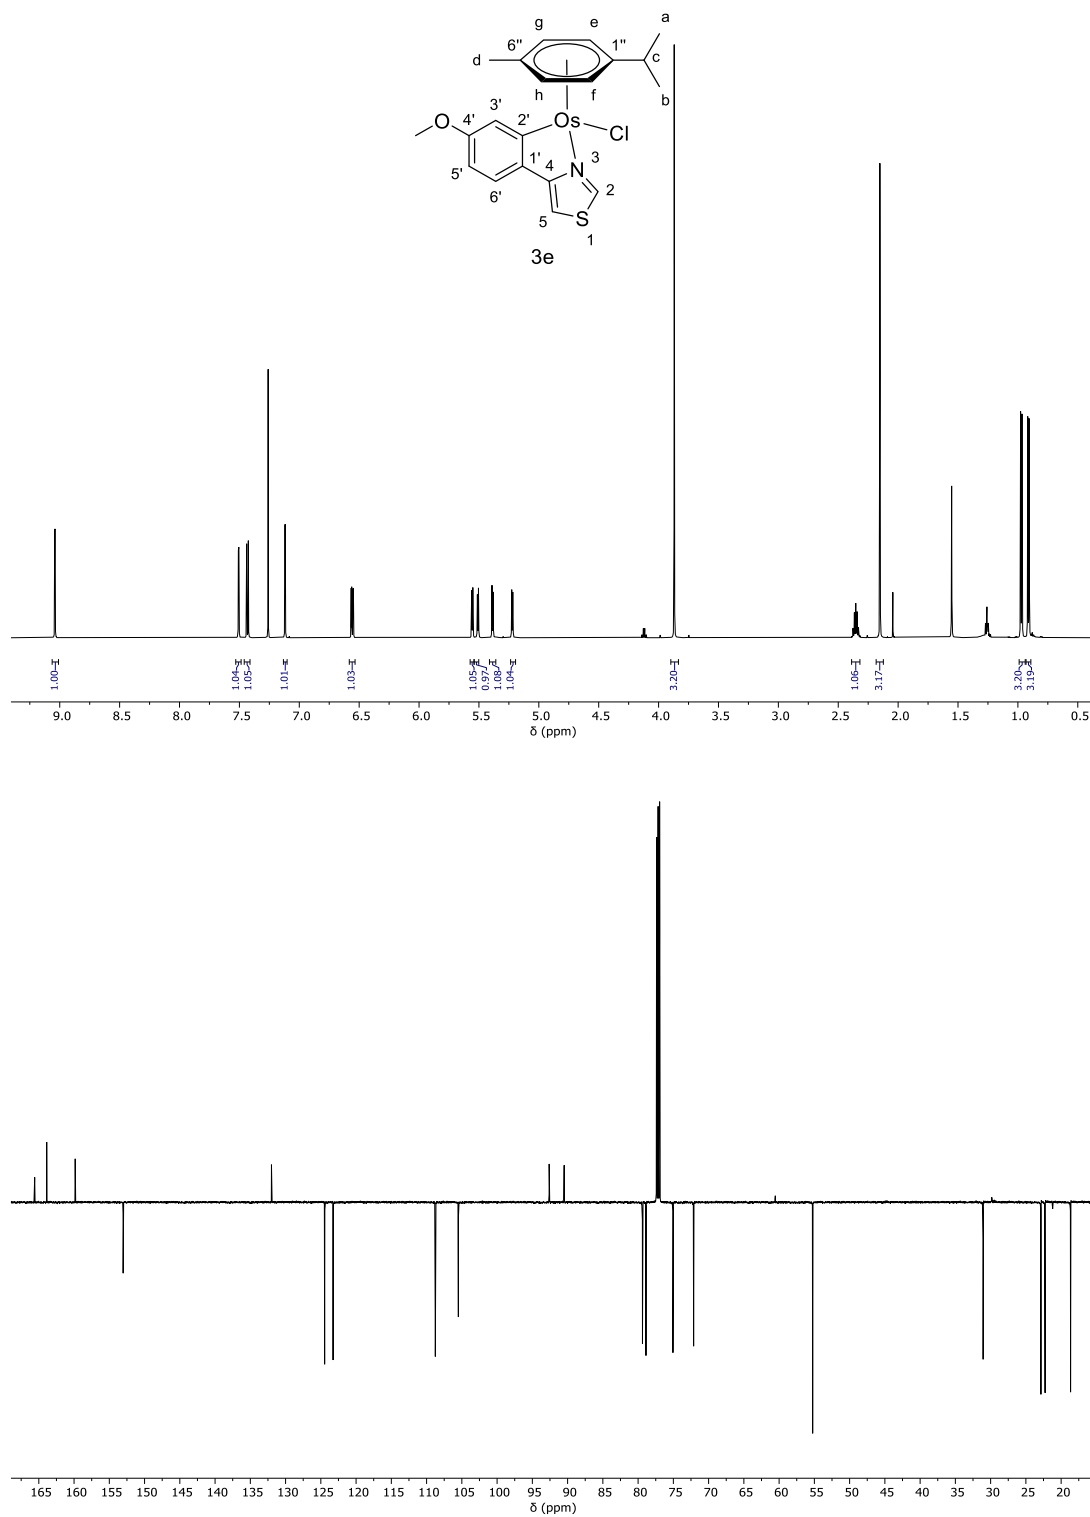

**Figure S15:** Atom numbering (above),  $^1\text{H}$  (center) and  $^{13}\text{C}$  (below) NMR of **3e** in  $\text{CDCl}_3$ .

### 3. Mass spectra

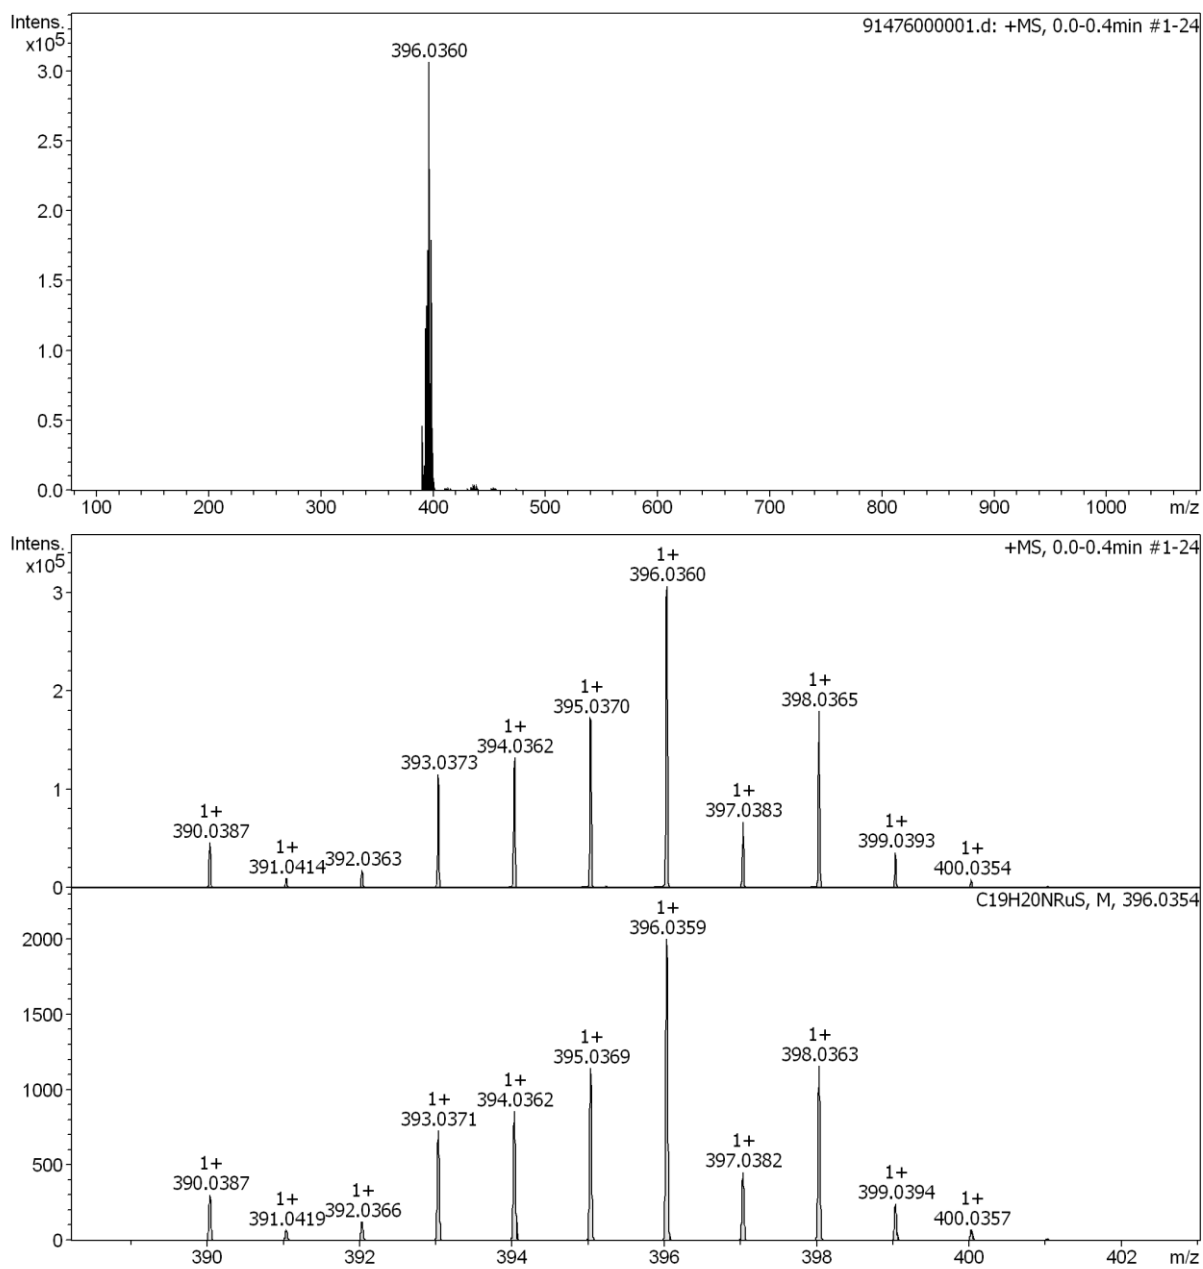

Figure S16: Top and middle: Mass spectrum of **2a** (M-Cl)<sup>+</sup>; Bottom: Calculated mass spectrum of **2a** (M-Cl)<sup>+</sup>.



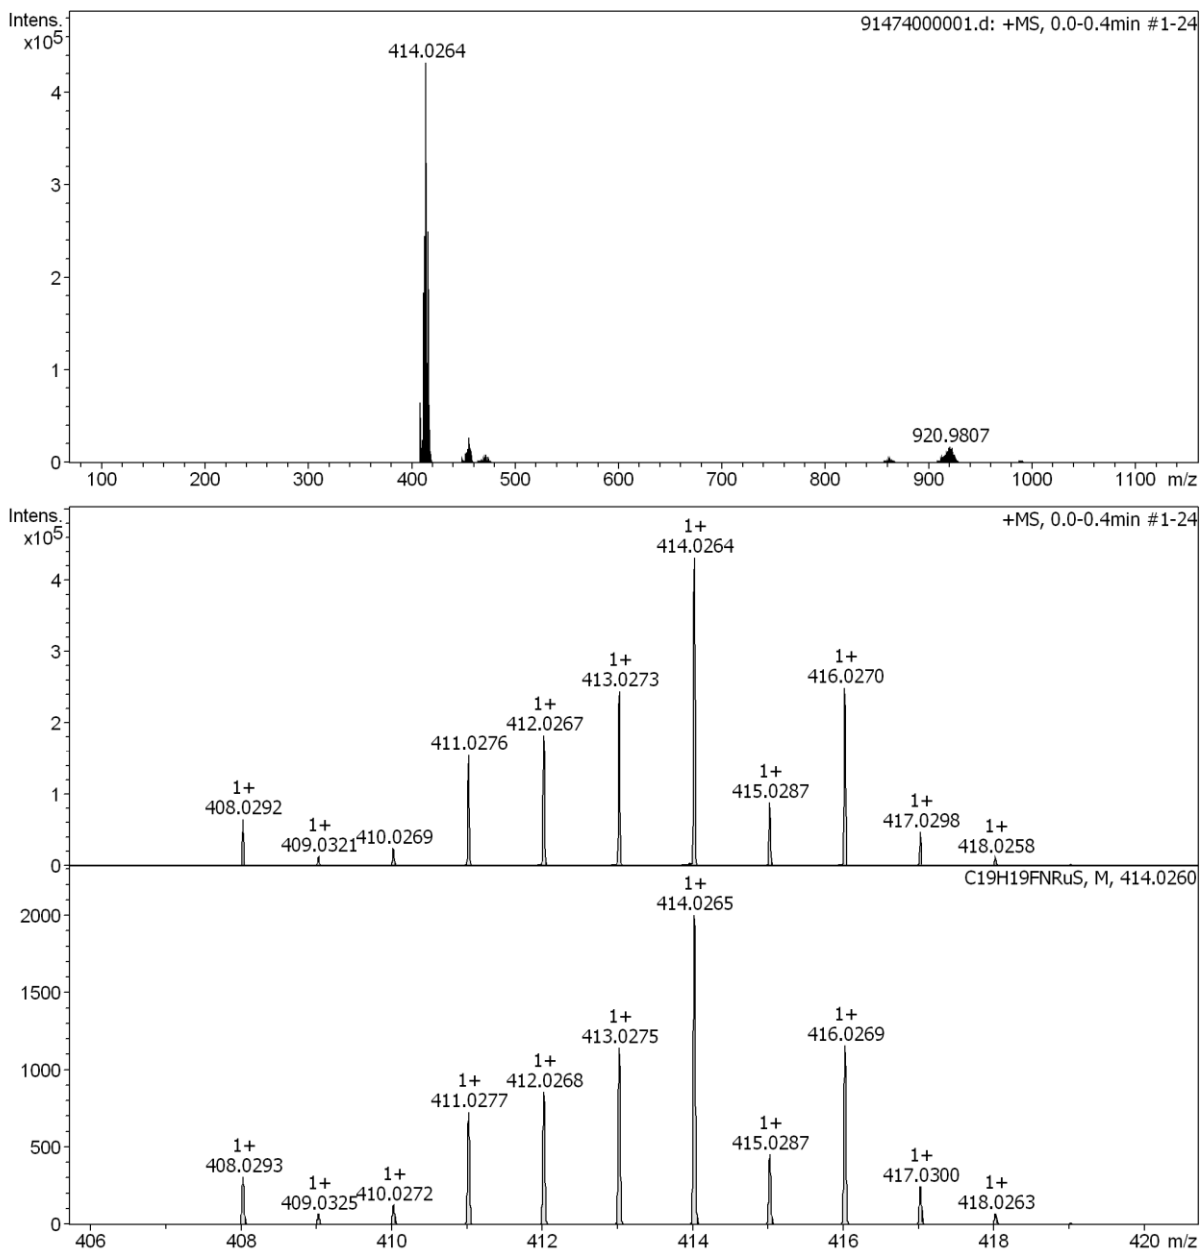

Figure S17: Top and middle: Mass spectrum of **2b** (M-Cl)<sup>+</sup>; Bottom: Calculated mass spectrum of **2b** (M-Cl)<sup>+</sup>.

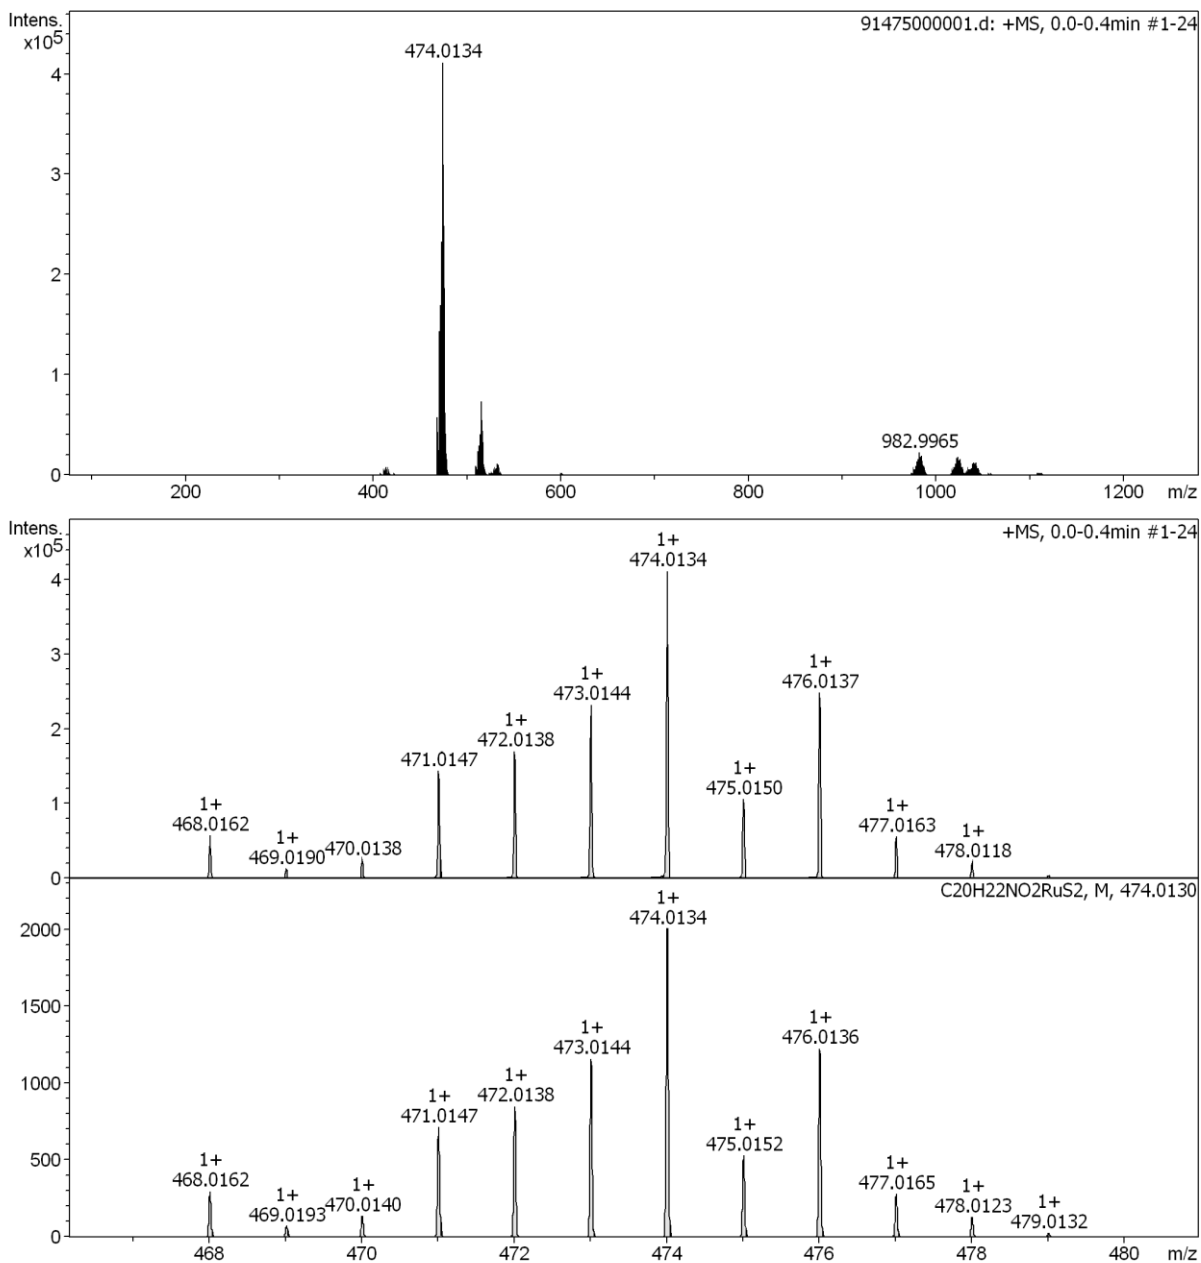

**Figure S18:** Top and middle: Mass spectrum of **2c** (M-Cl)<sup>+</sup>; Bottom: Calculated mass spectrum of **2c** (M-Cl)<sup>+</sup>.

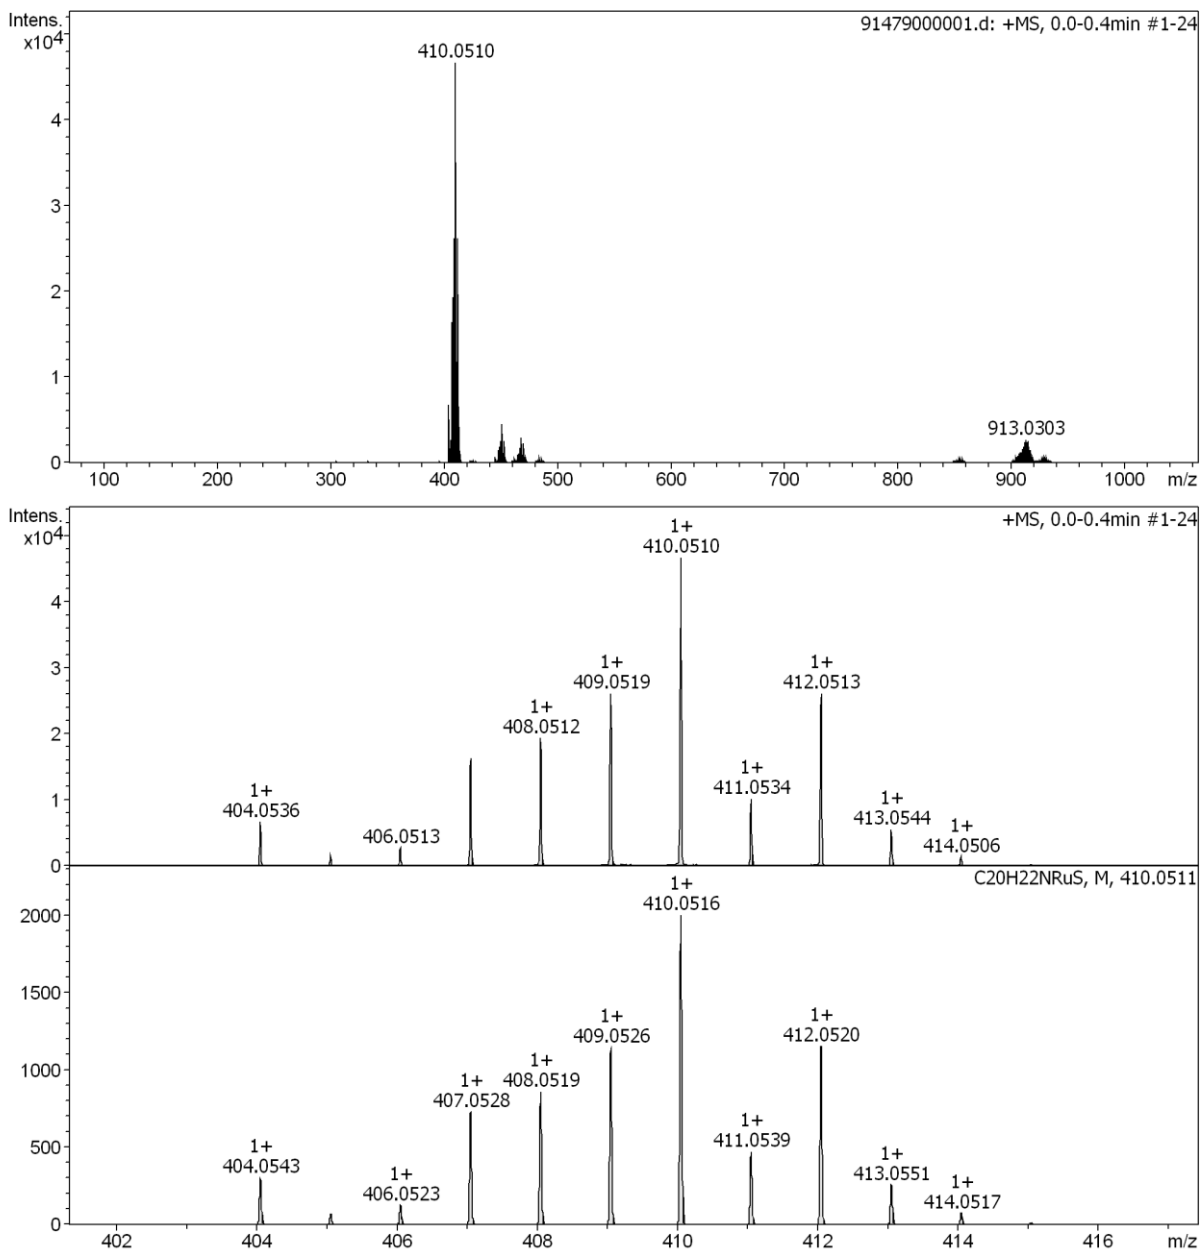

**Figure S19:** Top and middle: Mass spectrum of **2d** (M-Cl)<sup>+</sup>; Bottom: Calculated mass spectrum of **2d** (M-Cl)<sup>+</sup>.

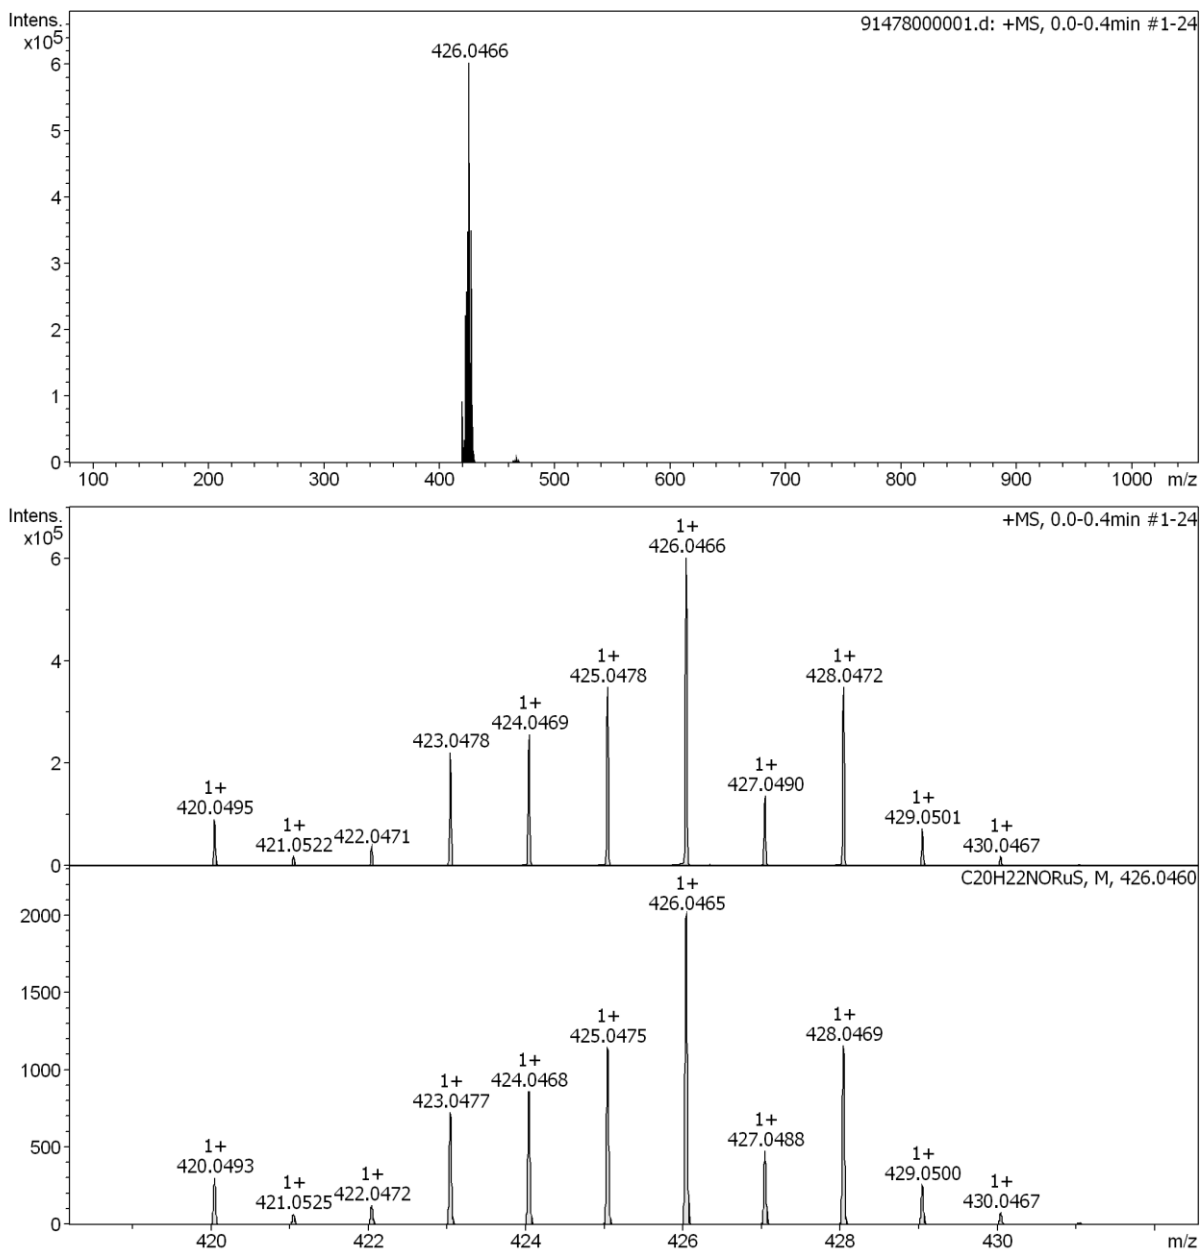

**Figure S20:** Top and middle: Mass spectrum of **2e** (M-Cl)<sup>+</sup>; Bottom: Calculated mass spectrum of **2e** (M-Cl)<sup>+</sup>.

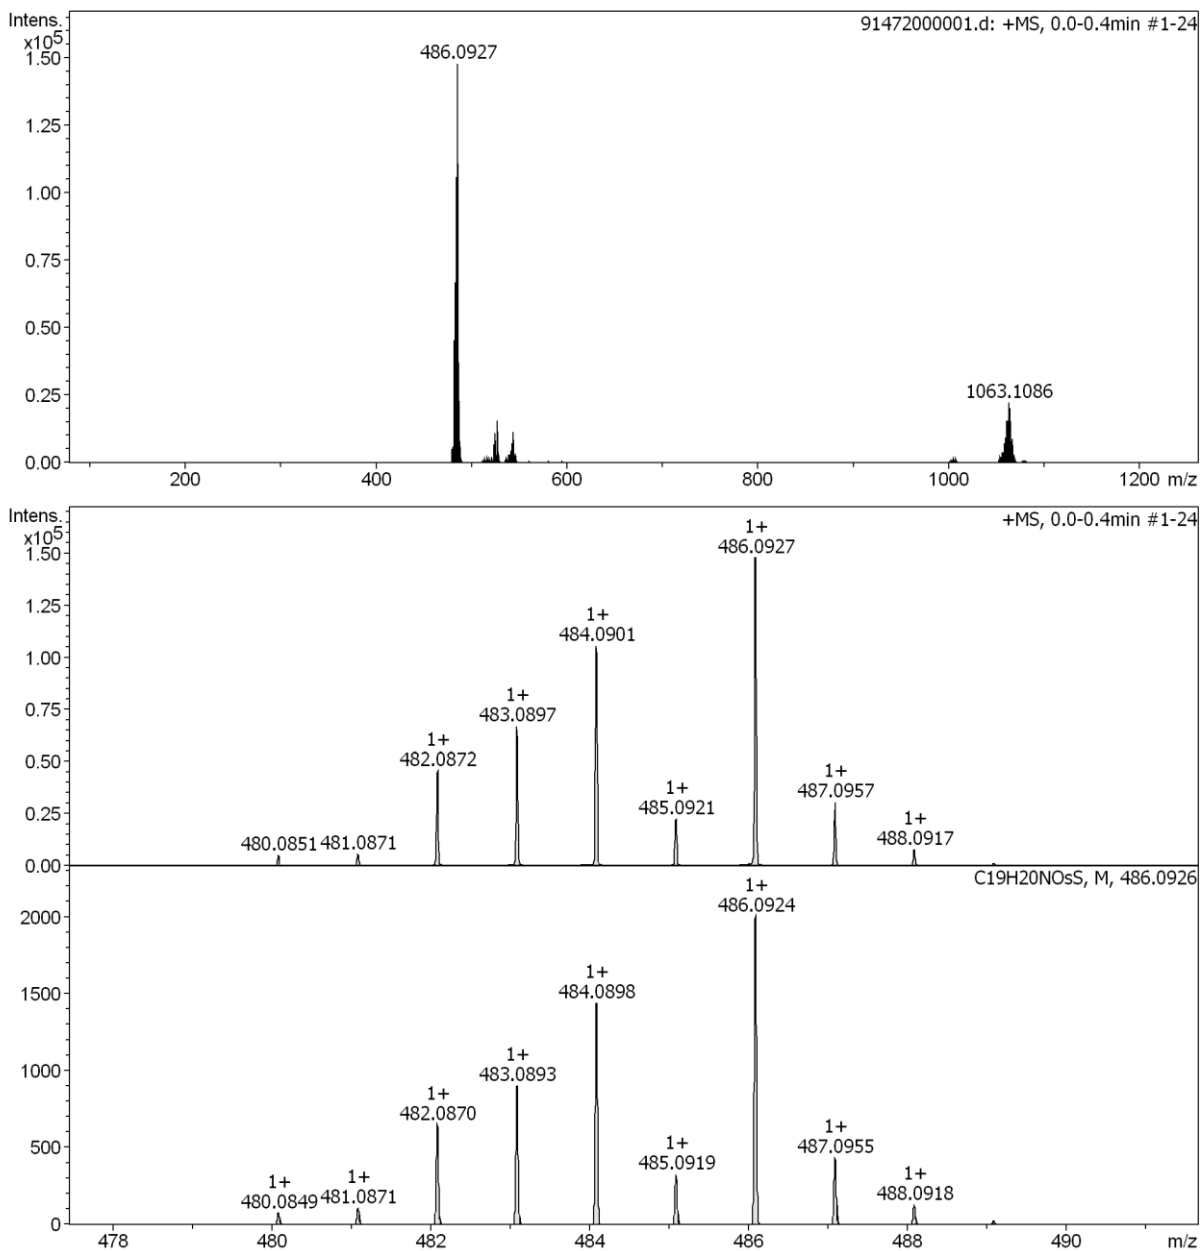

Figure S21: Top and middle: Mass spectrum of **3a** (M-Cl)<sup>+</sup>; Bottom: Calculated mass spectrum of **3a** (M-Cl)<sup>+</sup>.

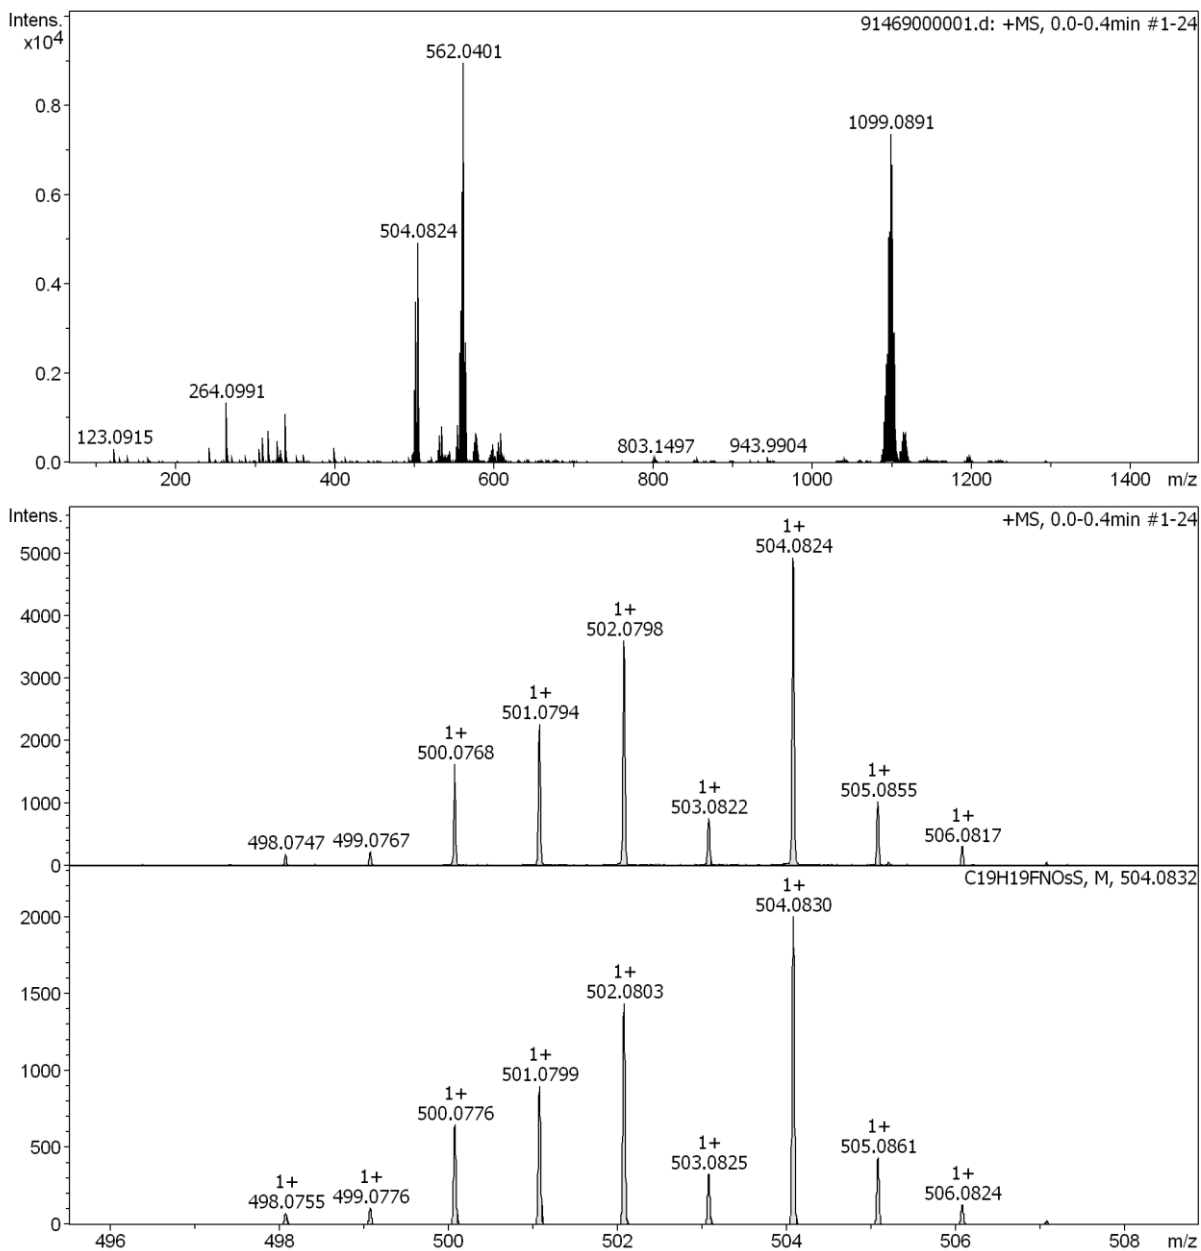

Figure S22: Top and middle: Mass spectrum of **3b** (M-Cl)<sup>+</sup>; Bottom: Calculated mass spectrum of **3b** (M-Cl)<sup>+</sup>.

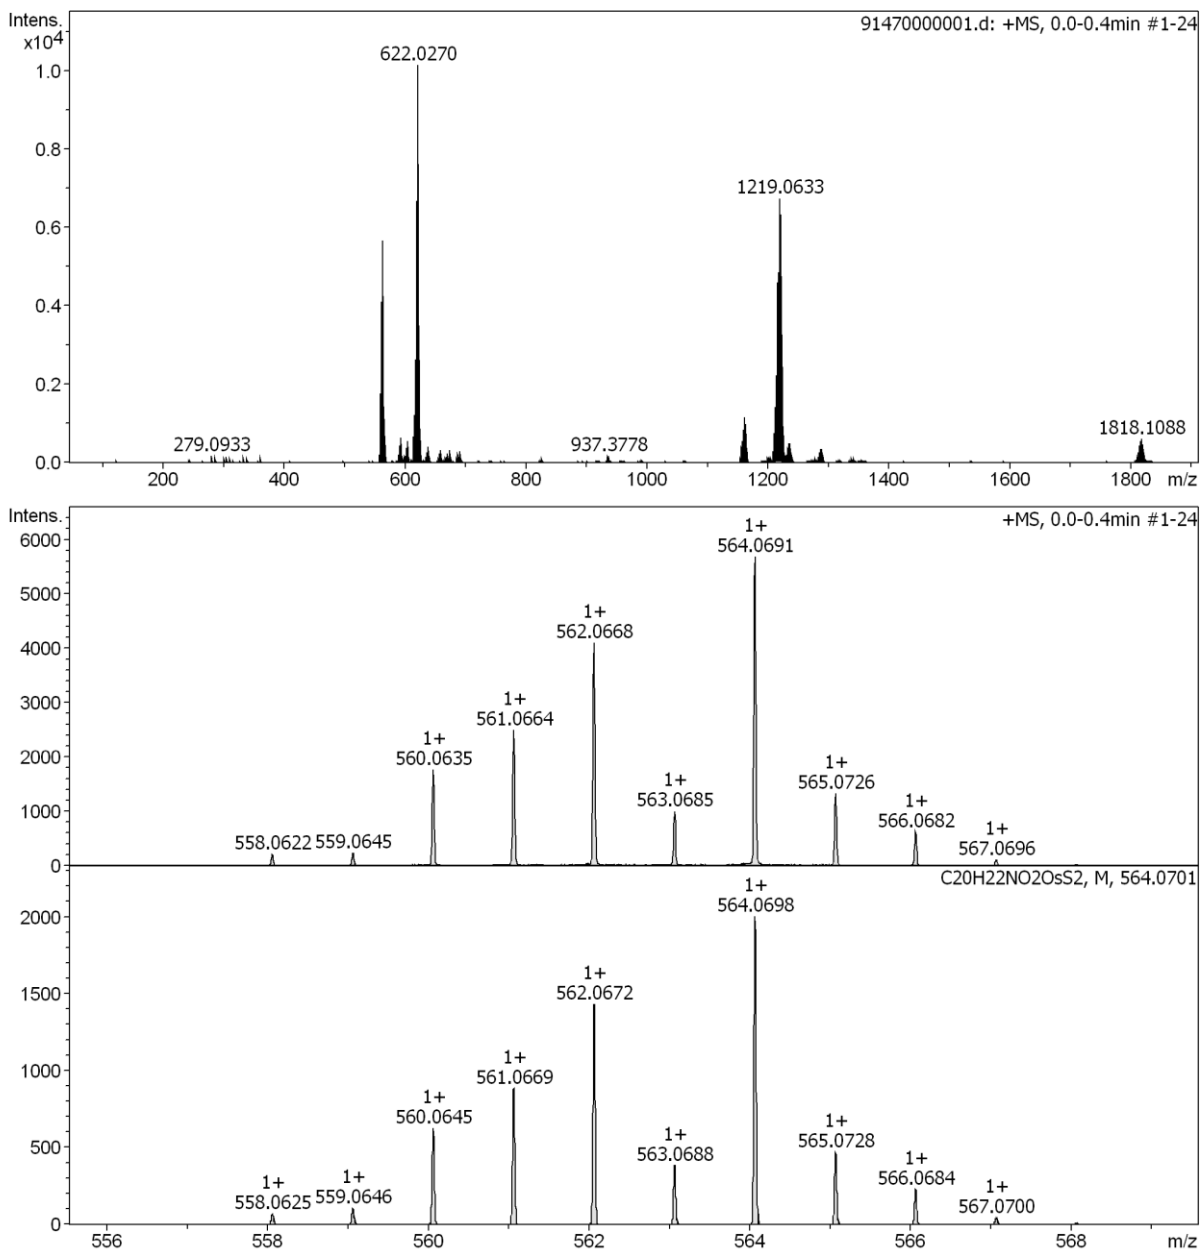

Figure S23: Top and middle: Mass spectrum of **3c** (M-Cl)<sup>+</sup>; Bottom: Calculated mass spectrum of **3c** (M-Cl)<sup>+</sup>.

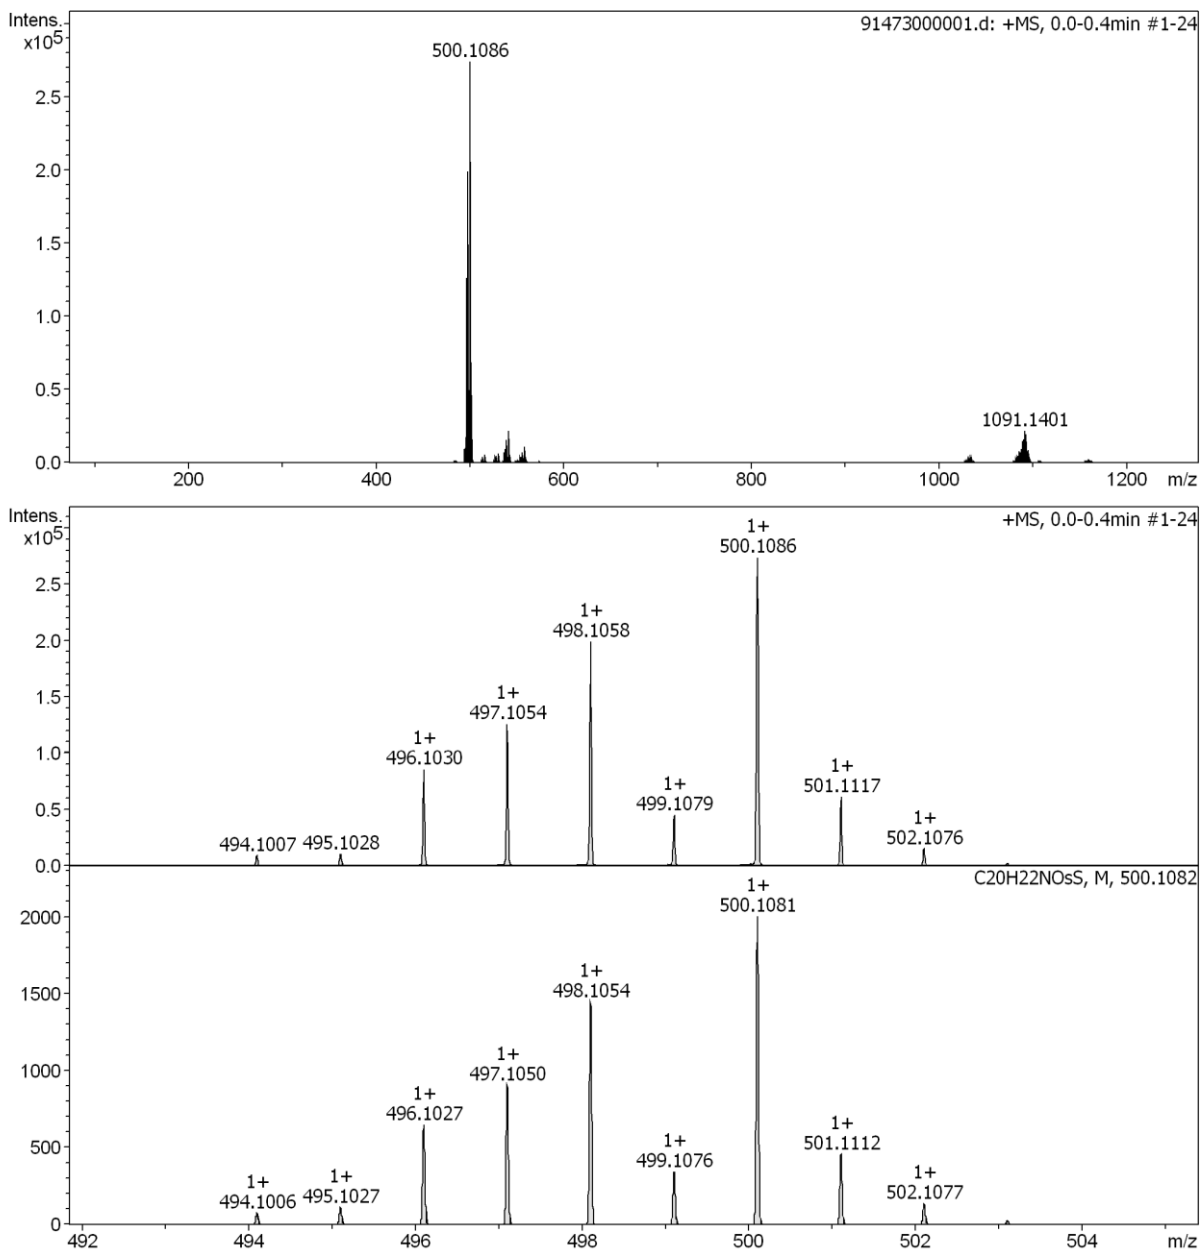

**Figure S24:** Top and middle: Mass spectrum of **3d** (M-Cl)<sup>+</sup>; Bottom: Calculated mass spectrum of **3d** (M-Cl)<sup>+</sup>.



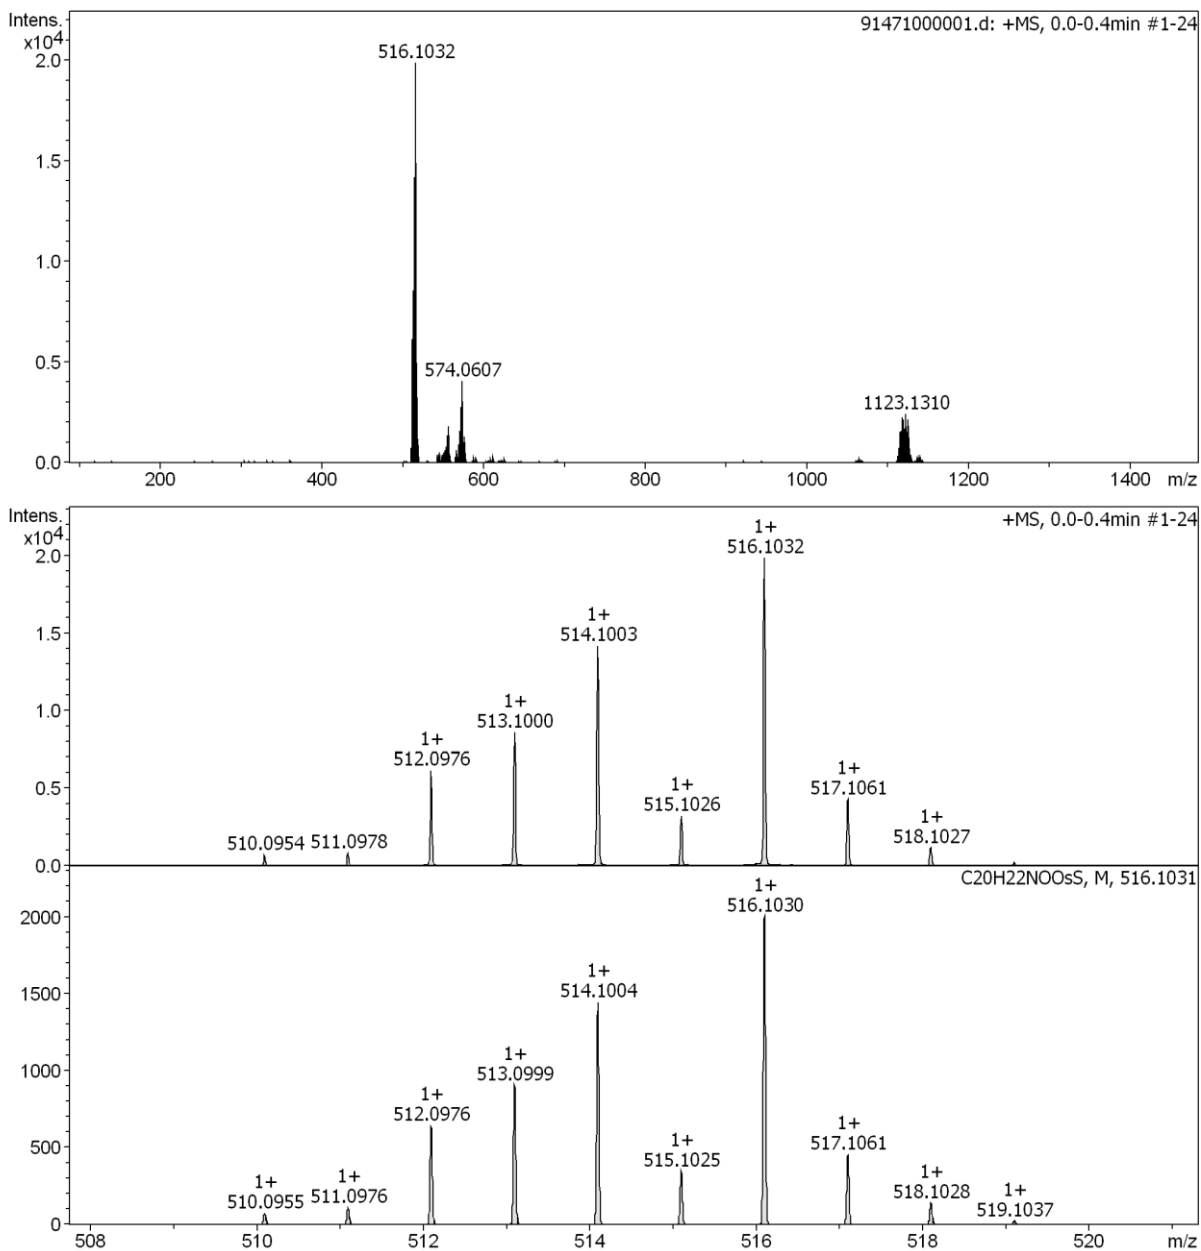

**Figure S25:** Top and middle: Mass spectrum of **3e** (M-Cl)<sup>+</sup>; Bottom: Calculated mass spectrum of **3e** (M-Cl)<sup>+</sup>.

## 4. X-ray diffraction analysis

The X-ray intensity data were measured on STOE STADIVARI diffractometer equipped with multilayer monochromator, micro focus sealed tube and Oxford cooling system (Cu K/α mit Primux 100 micro, Mo K/α mit AXO Mo). The structures were solved by *Intrinsic Phasing, Charge Flipping or Direct Methods*. Non-hydrogen atoms were refined with *anisotropic displacement parameters*. Hydrogen atoms were inserted at calculated positions and refined with riding model. The following software was used: X-Area Recipe<sup>i</sup>, X-Area Pilatus3\_SV<sup>ii</sup>, OLEX2<sup>iii</sup> for cell refinement, data collection, molecular diagrams and graphical user-interface, SHELXLE<sup>iv</sup> for refinement and graphical user-interface SHELXT-2015<sup>v</sup> for structure solution, SHELXL-2015<sup>vi</sup> for refinement, Platon<sup>vii</sup> for symmetry check. Experimental data and CCDC-Codes Experimental data (Available online: <http://www.ccdc.cam.ac.uk/conts/retrieving.html>) can be found in Table S1. Crystal data, data collection parameters, and structure refinement details are reported in Tables S2 to S8. Structures, packing, interactions, and data are visualized in Figures S1 to S8.

**Table S1:** Experimental Parameters and CCDC codes. Responsible for data evaluation: A. Prado-Roller.

| Sample | Machine | Source | Temp. | Detector distance | Time/Frame | #Frames | Frame width | CCDC    |
|--------|---------|--------|-------|-------------------|------------|---------|-------------|---------|
|        |         |        | [K]   | [mm]              | [s]        |         | [°]         |         |
| 2a     | Stoe    | Mo     | 100   | 50                | 0.1        | 2282    | 0.4         | 2296750 |
| 2b     | Stoe    | Mo     | 100   | 50                | 0.5        | 3063    | 0.4         | 2296747 |
| 2d     | Stoe    | Cu     | 100   | 40                | 1          | 14164   | 0.5         | 2296751 |
| 2e     | Stoe    | Mo     | 100   | 50                | 0.1        | 2472    | 0.4         | 2296753 |
| 3a     | Stoe    | Mo     | 100   | 40                | 4          | 3175    | 0.5         | 2296749 |
| 3b     | Stoe    | Mo     | 100   | 50                | 0.5        | 4647    | 0.4         | 2296745 |
| 3d     | Stoe    | Mo     | 100   | 40                | 2          | 2804    | 0.5         | 2296746 |

<sup>i</sup>Version 1.37.0.0 (STOE, 2021)

<sup>ii</sup>Version 1.31.186.0 (STOE, 2022)

<sup>iii</sup>Dolomanov, O.V., Bourhis, L.J., Gildea, R.J., Howard, J.A.K. & Puschmann, H., OLEX2, (2009), J. Appl. Cryst. 42, 339-341

<sup>iv</sup>C. B. Huebschle, G. M. Sheldrick and B. Dittrich, ShelXle: a Qt graphical user interface for SHELXL, J. Appl. Cryst., 44, (2011) 1281-1284

<sup>v</sup>Sheldrick, G. M. (2015). SHELXS v 2016/4 University of Göttingen, Germany.

<sup>vi</sup>Sheldrick, G. M. (2015). SHELXL v 2016/4 University of Göttingen, Germany.

<sup>vii</sup>A. L. Spek, Acta Cryst. 2009, D65, 148-155

**[(Chlorido)(4-phenylthiazolato- $\kappa$ N, $\kappa$ C2')]( $\eta^6$ -*p*-cymene)ruthenium(II)] (2a)**

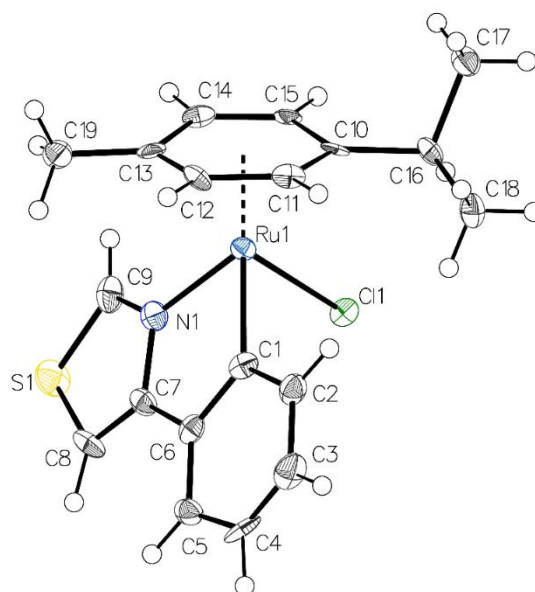

**Figure S26:** Crystal structure of **2a**, depicted using 50% displacement ellipsoids.

**Table S2:** Crystal data and structure refinement of **2a**.

|                                       |                                        |                                          |                                                                            |
|---------------------------------------|----------------------------------------|------------------------------------------|----------------------------------------------------------------------------|
| Chemical formula                      | C <sub>19</sub> H <sub>20</sub> ClNRuS | Crystal habit                            | Orange block                                                               |
| Formula weight [g/mol]                | 430.94                                 | Radiation wavelength                     | Mo K $\alpha$ ( $\lambda$ = 0.71073)                                       |
| Temperature [°K]                      | 100                                    | 2 $\theta$ range for data collection [°] | 4.06 to 50.694                                                             |
| Crystal system                        | monoclinic                             | Index ranges                             | -9 $\leq$ h $\leq$ 9,<br>-14 $\leq$ k $\leq$ 14,<br>-21 $\leq$ l $\leq$ 20 |
| Space group                           | P2 <sub>1</sub> / <i>n</i>             | Reflections collected                    | 16878                                                                      |
| a [Å]                                 | 7.9520(17)                             | Independent reflections                  | 3149 [R <sub>int</sub> = 0.0787, R <sub>sigma</sub> = 0.0704]              |
| b [Å]                                 | 12.1531(12)                            | Data/restraints/parameters               | 3149/0/211                                                                 |
| c [Å]                                 | 18.037(3)                              | Goodness-of-fit on F                     | 0.992                                                                      |
| $\alpha$ [°]                          | 90                                     | Final R indexes [ $I \geq 2\sigma(I)$ ]  | R <sub>1</sub> = 0.0504,<br>wR <sub>2</sub> = 0.1180                       |
| $\beta$ [°]                           | 99.698(15)                             | Final R indexes [all data]               | R <sub>1</sub> = 0.0658,<br>wR <sub>2</sub> = 0.1284                       |
| $\gamma$ [°]                          | 90                                     | Largest diff. peak/hole [Å]              | 1.18/-1.50                                                                 |
| Volume [Å <sup>3</sup> ]              | 1718.2(5)                              |                                          |                                                                            |
| Z                                     | 4                                      |                                          |                                                                            |
| Density (calc.) [g/cm <sup>3</sup> ]  | 1.666                                  |                                          |                                                                            |
| Absorption coeff. [mm <sup>-1</sup> ] | 1.187                                  |                                          |                                                                            |
| F(000)                                | 872.0                                  |                                          |                                                                            |
| Crystal size [mm]                     | 0.5 $\times$ 0.32 $\times$ 0.16        |                                          |                                                                            |

**[(Chlorido)(4-(4-fluorophenyl)thiazolato- $\kappa$ N, $\kappa$ C2')]( $\eta^6$ -*p*-cymene)ruthenium(II)] (**2b**)**

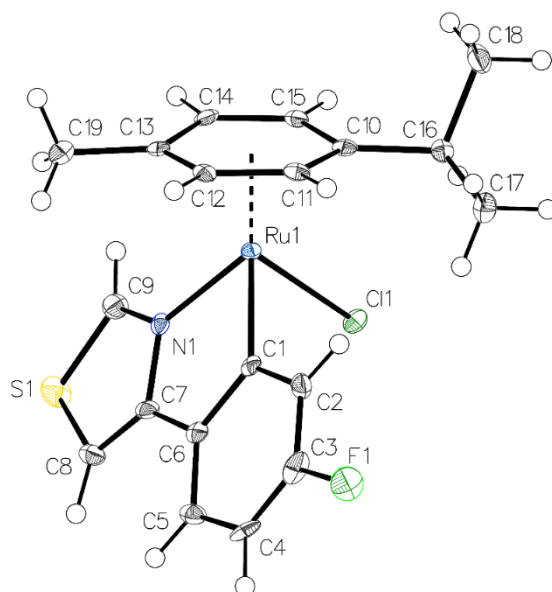

**Figure S27:** Crystal structure of **2b**, depicted with 50% displacement ellipsoids.

**Table S3:** Crystal data and structure refinement of **2b**.

|                                       |                                         |                                          |                                                                              |
|---------------------------------------|-----------------------------------------|------------------------------------------|------------------------------------------------------------------------------|
| Chemical formula                      | C <sub>19</sub> H <sub>19</sub> ClFNRuS | Radiation wavelength                     | Mo K $\alpha$ ( $\lambda$ = 0.71073)                                         |
| Formula weight [g/mol]                | 448.93                                  | 2 $\theta$ range for data collection [°] | 4.032 to 61.978                                                              |
| Temperature [°K]                      | 100                                     | Index ranges                             | -11 $\leq$ h $\leq$ 11,<br>-17 $\leq$ k $\leq$ 17,<br>-26 $\leq$ l $\leq$ 26 |
| Crystal system                        | monoclinic                              | Reflections collected                    | 48483                                                                        |
| Space group                           | P2 <sub>1</sub> /n                      | Independent reflections                  | 5302 [R <sub>int</sub> = 0.0540, R <sub>sigma</sub> = 0.0919]                |
| a [Å]                                 | 7.8645(8)                               | Data/restraints/parameters               | 5302/0/220                                                                   |
| b [Å]                                 | 12.1266(14)                             | Goodness-of-fit on F                     | 0.896                                                                        |
| c [Å]                                 | 18.5026(17)                             | Final R indexes [ $I \geq 2\sigma(I)$ ]  | R <sub>1</sub> = 0.0271,<br>wR <sub>2</sub> = 0.0482                         |
| $\alpha$ [°]                          | 90                                      | Final R indexes [all data]               | R <sub>1</sub> = 0.0489,<br>wR <sub>2</sub> = 0.0507                         |
| $\beta$ [°]                           | 99.203(8)                               | Largest diff. peak/hole [Å]              | 0.85/-1.73                                                                   |
| $\gamma$ [°]                          | 90                                      |                                          |                                                                              |
| Volume [Å <sup>3</sup> ]              | 1741.9(3)                               |                                          |                                                                              |
| Z                                     | 4                                       |                                          |                                                                              |
| Density (calc.) [g/cm <sup>3</sup> ]  | 1.712                                   |                                          |                                                                              |
| Absorption coeff. [mm <sup>-1</sup> ] | 1.183                                   |                                          |                                                                              |
| F(000)                                | 904.0                                   |                                          |                                                                              |
| Crystal size [mm]                     | 0.13 $\times$ 0.12 $\times$ 0.1         |                                          |                                                                              |
| Crystal habit                         | Yellow chunk                            |                                          |                                                                              |

Water cocrystal structure available (CCDC code: 2296748).

**[(Chlorido)(4-(4-methylphenyl)thiazolato-κN,κC2′)(η<sup>6</sup>-p-cymene)ruthenium(II)] (2d)**

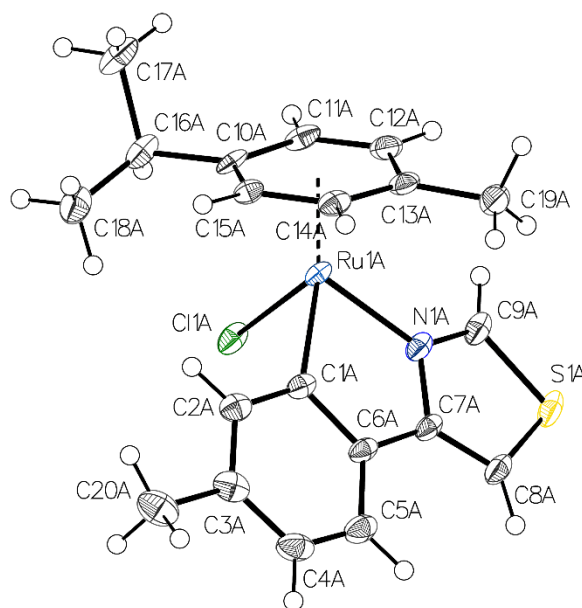

**Figure S28:** Crystal structure of **2d**, depicted with 50% displacement ellipsoids. The second molecule of the asymmetric unit is not shown for clarity reasons.

**Table S4:** Crystal data and structure refinement of **2d**.

|                                       |                                        |
|---------------------------------------|----------------------------------------|
| Chemical formula                      | C <sub>20</sub> H <sub>22</sub> ClNRuS |
| Formula weight [g/mol]                | 444.96                                 |
| Temperature [°K]                      | 100                                    |
| Crystal system                        | monoclinic                             |
| Space group                           | P2 <sub>1</sub> /c                     |
| a [Å]                                 | 19.8899(2)                             |
| b [Å]                                 | 12.5816(1)                             |
| c [Å]                                 | 14.901(2)                              |
| α [°]                                 | 90                                     |
| β [°]                                 | 96.418(10)                             |
| γ [°]                                 | 90                                     |
| Volume [Å <sup>3</sup> ]              | 3705.56(7)                             |
| Z                                     | 8                                      |
| Density (calc.) [g/cm <sup>3</sup> ]  | 1.595                                  |
| Absorption coeff. [mm <sup>-1</sup> ] | 9.218                                  |
| F(000)                                | 1808.0                                 |
| Crystal size [mm]                     | 0.244 × 0.174<br>× 0.117               |

|                                  |                                                              |
|----------------------------------|--------------------------------------------------------------|
| Crystal habit                    | Orange chunk                                                 |
| Radiation wavelength             | Cu Kα (λ = 1.54178)                                          |
| 2θ range for data collection [°] | 8.33 to 139.892                                              |
| Index ranges                     | -24 ≤ h ≤ 21,<br>-15 ≤ k ≤ 14,<br>-18 ≤ l ≤ 8                |
| Reflections collected            | 79338                                                        |
| Independent reflections          | 6746 [R <sub>int</sub> = 0.019, R <sub>sigma</sub> = 0.0083] |
| Data/restraints/parameters       | 6746/0/442                                                   |
| Goodness-of-fit on F             | 1.087                                                        |
| Final R indexes [I ≥ 2σ (I)]     | R <sub>1</sub> = 0.0296,<br>wR <sub>2</sub> = 0.0783         |
| Final R indexes [all data]       | R <sub>1</sub> = 0.0305,<br>wR <sub>2</sub> = 0.0789         |
| Largest diff. peak/hole [Å]      | 1.5/-1.5                                                     |

**[(Chlorido)(4-(4-methoxyphenyl)thiazolato-κN,κC2')(η<sup>6</sup>-*p*-cymene)ruthenium(II)] (2e)**

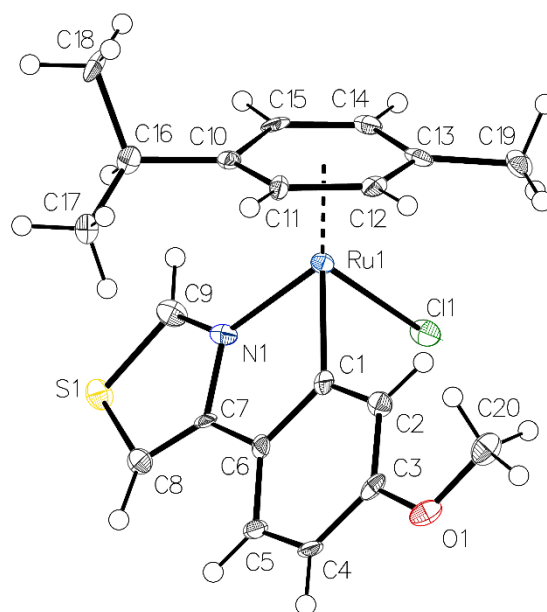

**Figure S29:** Crystal structure of **2e**, depicted with 50% displacement ellipsoids.

**Table S5:** Crystal data and structure refinement of **2e**.

|                                       |                                         |                                  |                                                               |
|---------------------------------------|-----------------------------------------|----------------------------------|---------------------------------------------------------------|
| Chemical formula                      | C <sub>20</sub> H <sub>22</sub> ClNORuS | Crystal habit                    | Orange chunk                                                  |
| Formula weight [g/mol]                | 460.96                                  | Radiation wavelength             | Mo Kα (λ = 0.71073)                                           |
| Temperature [°K]                      | 100                                     | 2θ range for data collection [°] | 3.458 to 50.698                                               |
| Crystal system                        | monoclinic                              | Index ranges                     | -17 ≤ h ≤ 17,<br>-11 ≤ k ≤ 9,<br>-17 ≤ l ≤ 17                 |
| Space group                           | P2 <sub>1/n</sub>                       | Reflections collected            | 16385                                                         |
| a [Å]                                 | 14.523(2)                               | Independent reflections          | 3492 [R <sub>int</sub> = 0.0613, R <sub>sigma</sub> = 0.0967] |
| b [Å]                                 | 9.328(2)                                | Data/restraints/parameters       | 3492/0/230                                                    |
| c [Å]                                 | 14.748(2)                               | Goodness-of-fit on F             | 0.849                                                         |
| α [°]                                 | 90                                      | Final R indexes [I ≥ 2σ (I)]     | R <sub>1</sub> = 0.0340,<br>wR <sub>2</sub> = 0.0632          |
| β [°]                                 | 107.171(11)                             | Final R indexes [all data]       | R <sub>1</sub> = 0.0513,<br>wR <sub>2</sub> = 0.0664          |
| γ [°]                                 | 90                                      | Largest diff. peak/hole [Å]      | 0.64/-0.92                                                    |
| Volume [Å <sup>3</sup> ]              | 1908.9(6)                               |                                  |                                                               |
| Z                                     | 4                                       |                                  |                                                               |
| Density (calc.) [g/cm <sup>3</sup> ]  | 1.604                                   |                                  |                                                               |
| Absorption coeff. [mm <sup>-1</sup> ] | 1.078                                   |                                  |                                                               |
| F(000)                                | 936.0                                   |                                  |                                                               |
| Crystal size [mm]                     | 0.3 × 0.267 × 0.25                      |                                  |                                                               |

**(Chlorido)(4-phenylthiazolato- $\kappa$ N, $\kappa$ C2')( $\eta^6$ -*p*-cymene)osmium(II)] (3a)**

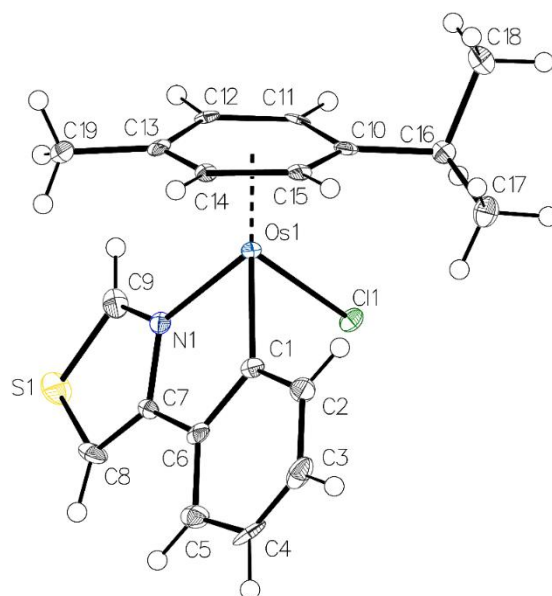

**Figure S30:** Crystal structure of **3a**, depicted with 50% displacement ellipsoids.

**Table S6:** Crystal data and structure refinement of **3a**.

|                                       |                                        |
|---------------------------------------|----------------------------------------|
| Chemical formula                      | C <sub>19</sub> H <sub>20</sub> ClNOsS |
| Formula weight [g/mol]                | 520.07                                 |
| Temperature [°K]                      | 100                                    |
| Crystal system                        | monoclinic                             |
| Space group                           | P2 <sub>1/n</sub>                      |
| a [Å]                                 | 7.9442(3)                              |
| b [Å]                                 | 12.0992(4)                             |
| c [Å]                                 | 18.0987(6)                             |
| α [°]                                 | 90                                     |
| β [°]                                 | 99.821(3)                              |
| γ [°]                                 | 90                                     |
| Volume [Å <sup>3</sup> ]              | 1714.13(10)                            |
| Z                                     | 4                                      |
| Density (calc.) [g/cm <sup>3</sup> ]  | 2.015                                  |
| Absorption coeff. [mm <sup>-1</sup> ] | 7.715                                  |
| F(000)                                | 1000.0                                 |
| Crystal size [mm]                     | 0.08 × 0.08 × 0.08                     |

|                                  |                                                               |
|----------------------------------|---------------------------------------------------------------|
| Crystal habit                    | Yellow chunk                                                  |
| Radiation wavelength             | Mo Kα (λ = 0.71073)                                           |
| 2θ range for data collection [°] | 5.314 to 57.31                                                |
| Index ranges                     | -10 ≤ h ≤ 10,<br>-15 ≤ k ≤ 16,<br>-21 ≤ l ≤ 24                |
| Reflections collected            | 37949                                                         |
| Independent reflections          | 4268 [R <sub>int</sub> = 0.0578, R <sub>sigma</sub> = 0.0443] |
| Data/restraints/parameters       | 4268/0/211                                                    |
| Goodness-of-fit on F             | 1.038                                                         |
| Final R indexes [I ≥ 2σ (I)]     | R <sub>1</sub> = 0.0248,<br>wR <sub>2</sub> = 0.0511          |
| Final R indexes [all data]       | R <sub>1</sub> = 0.0420,<br>wR <sub>2</sub> = 0.0569          |
| Largest diff. peak/hole [Å]      | 1.52/-2.02                                                    |

**(Chlorido)(4-(4-fluorophenyl)thiazolato-κN,κC2')(η<sup>6</sup>-p-cymene)osmium(II)] (3b)**

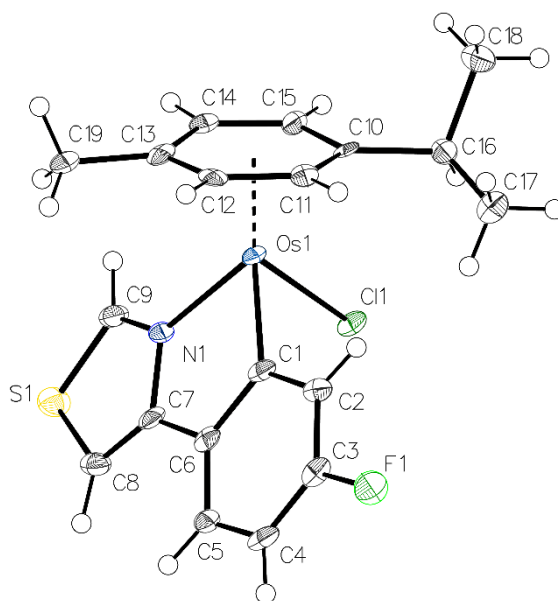

**Figure S31:** Crystal structure of **3b**, depicted with 50% displacement ellipsoids.

**Table S7:** Crystal data and structure refinement of **3b**.

|                                       |                                                      |                                  |                                                               |
|---------------------------------------|------------------------------------------------------|----------------------------------|---------------------------------------------------------------|
| Chemical formula                      | C <sub>19</sub> H <sub>19</sub> ClFNO <sub>2</sub> S | Crystal habit                    | Yellow chunk                                                  |
| Formula weight [g/mol]                | 538.06                                               | Radiation wavelength             | Mo Kα (λ = 0.71073)                                           |
| Temperature [°K]                      | 100                                                  | 2θ range for data collection [°] | 4.042 to 50.692                                               |
| Crystal system                        | monoclinic                                           | Index ranges                     | -9 ≤ h ≤ 9,<br>-14 ≤ k ≤ 14,<br>-22 ≤ l ≤ 22                  |
| Space group                           | P2 <sub>1</sub> /n                                   | Reflections collected            | 32861                                                         |
| a [Å]                                 | 7.8664(6)                                            | Independent reflections          | 3193 [R <sub>int</sub> = 0.0969, R <sub>sigma</sub> = 0.0500] |
| b [Å]                                 | 12.0681(12)                                          | Data/restraints/parameters       | 3193/0/221                                                    |
| c [Å]                                 | 18.5613(15)                                          | Goodness-of-fit on F             | 1.006                                                         |
| α [°]                                 | 90                                                   | Final R indexes [I ≥ 2σ (I)]     | R <sub>1</sub> = 0.0383,<br>wR <sub>2</sub> = 0.0949          |
| β [°]                                 | 99.276(6)                                            | Final R indexes [all data]       | R <sub>1</sub> = 0.0519,<br>wR <sub>2</sub> = 0.1019          |
| γ [°]                                 | 90                                                   | Largest diff. peak/hole [Å]      | 2.21/-2.33                                                    |
| Volume [Å <sup>3</sup> ]              | 1739.0(3)                                            |                                  |                                                               |
| Z                                     | 4                                                    |                                  |                                                               |
| Density (calc.) [g/cm <sup>3</sup> ]  | 2.055                                                |                                  |                                                               |
| Absorption coeff. [mm <sup>-1</sup> ] | 7.616                                                |                                  |                                                               |
| F(000)                                | 1032.0                                               |                                  |                                                               |
| Crystal size [mm]                     | 0.24 × 0.22 × 0.2                                    |                                  |                                                               |

Water cocrystal structure available (CCDC code: 2296752).



**(Chlorido)(4-(4-methylphenyl)thiazolato- $\kappa$ N, $\kappa$ C2')( $\eta^6$ -*p*-cymene)osmium(II)] (3d)**

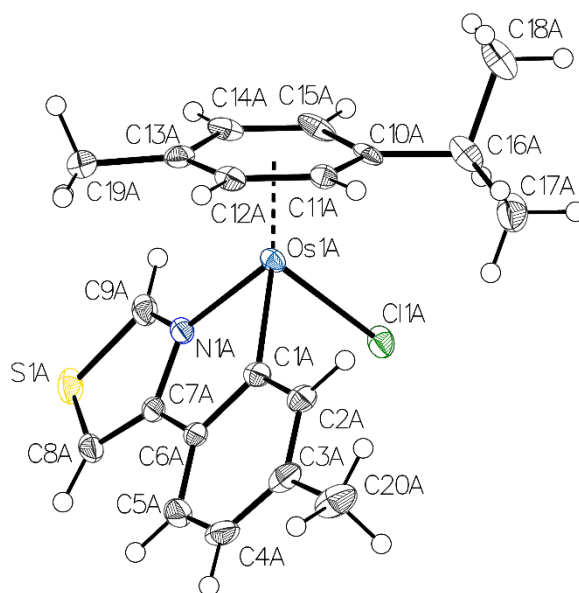

**Figure S32:** Crystal structure of **3d**, depicted with 50% displacement ellipsoids. The second molecule of the asymmetric unit is not shown for clarity reasons.

**Table S8:** Crystal data and structure refinement of **3d**.

|                                       |                                        |                                          |                                                                              |
|---------------------------------------|----------------------------------------|------------------------------------------|------------------------------------------------------------------------------|
| Chemical formula                      | C <sub>20</sub> H <sub>22</sub> ClNOsS | Crystal Habit                            | Yellow chunk                                                                 |
| Formula weight [g/mol]                | 534.09                                 | Radiation wavelength                     | Mo K $\alpha$ ( $\lambda$ = 0.71073)                                         |
| Temperature [°K]                      | 100                                    | 2 $\theta$ range for data collection [°] | 4.244 to 60.066                                                              |
| Crystal system                        | monoclinic                             | Index ranges                             | -27 $\leq$ h $\leq$ 27,<br>-17 $\leq$ k $\leq$ 14,<br>-20 $\leq$ l $\leq$ 20 |
| Space group                           | P2 <sub>1/c</sub>                      | Reflections collected                    | 83084                                                                        |
| a [Å]                                 | 19.8295(5)                             | Independent reflections                  | 10822 [R <sub>int</sub> = 0.0507, R <sub>sigma</sub> = 0.0532]               |
| b [Å]                                 | 12.5808(2)                             | Data/restraints/parameters               | 10822/0/462                                                                  |
| c [Å]                                 | 14.9234(3)                             | Goodness-of-fit on F                     | 0.931                                                                        |
| $\alpha$ [°]                          | 90                                     | Final R indexes [ $I \geq 2\sigma(I)$ ]  | R <sub>1</sub> = 0.0240,<br>wR <sub>2</sub> = 0.0396                         |
| $\beta$ [°]                           | 95.974(2)                              | Final R indexes [all data]               | R <sub>1</sub> = 0.0416,<br>wR <sub>2</sub> = 0.0410                         |
| $\gamma$ [°]                          | 90                                     | Largest diff. peak/hole [Å]              | 2.41/-1.42                                                                   |
| Volume [Å <sup>3</sup> ]              | 3702.74(13)                            |                                          |                                                                              |
| Z                                     | 8                                      |                                          |                                                                              |
| Density (calc.) [g/cm <sup>3</sup> ]  | 1.916                                  |                                          |                                                                              |
| Absorption coeff. [mm <sup>-1</sup> ] | 7.146                                  |                                          |                                                                              |
| F(000)                                | 2064.0                                 |                                          |                                                                              |
| Crystal size [mm]                     | 0.22 $\times$ 0.133 $\times$ 0.08      |                                          |                                                                              |

## 5. Stability in aqueous solution

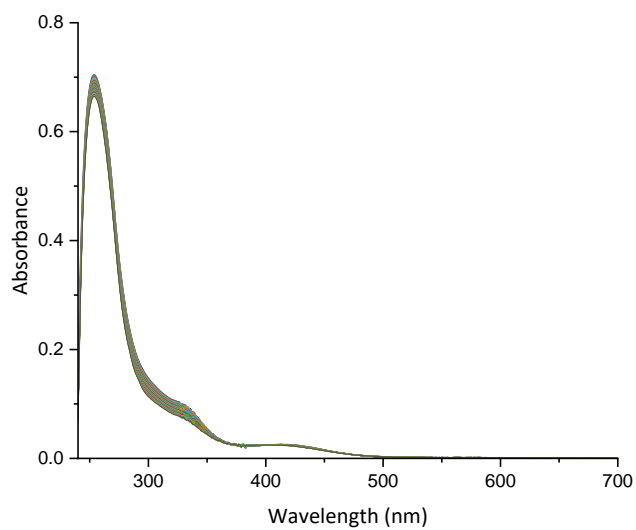

**Figure S33:** UV-Vis spectra of **2a** in PBS (1% DMF), 30 min intervals over 24 h.

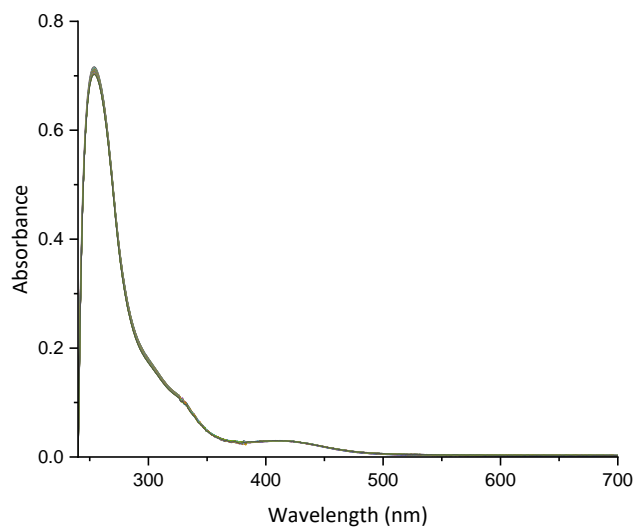

**Figure S34:** UV-Vis spectra of **2b** in PBS (1% DMF), 30 min intervals over 24 h.

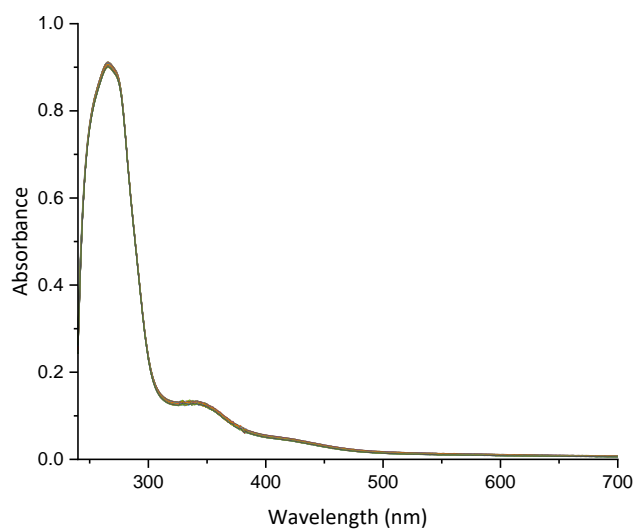

**Figure S35:** UV-Vis spectra of **2c** in PBS (1% DMF), 30 min intervals over 24 h.

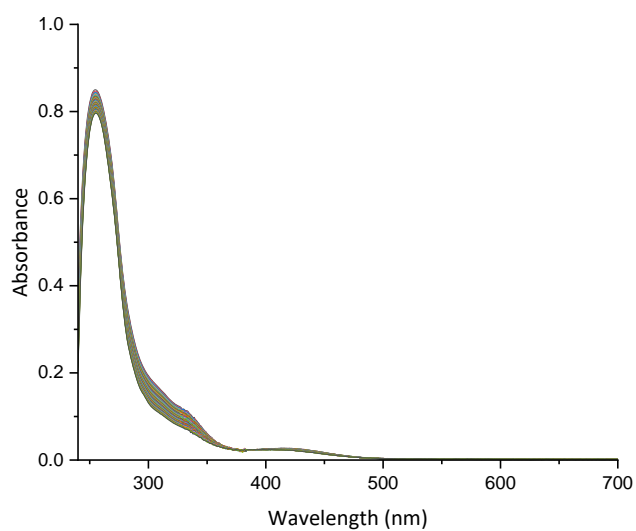

**Figure S36:** UV-Vis spectra of **2d** in PBS (1% DMF), 30 min intervals over 24 h.

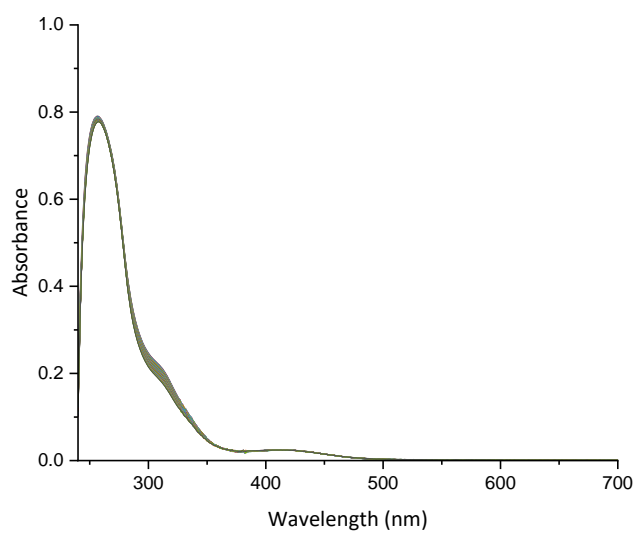

**Figure S37:** UV-Vis spectra of **2e** in PBS (1% DMF), 30 min intervals over 24 h.

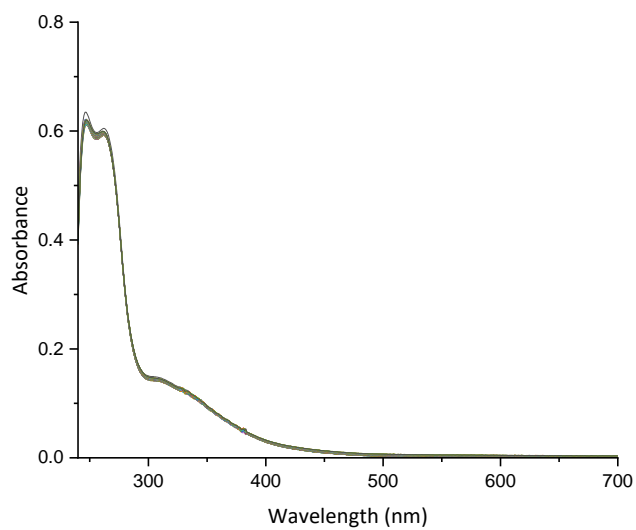

**Figure S38:** UV-Vis spectra of **3a** in PBS (1% DMF), 30 min intervals over 24 h.

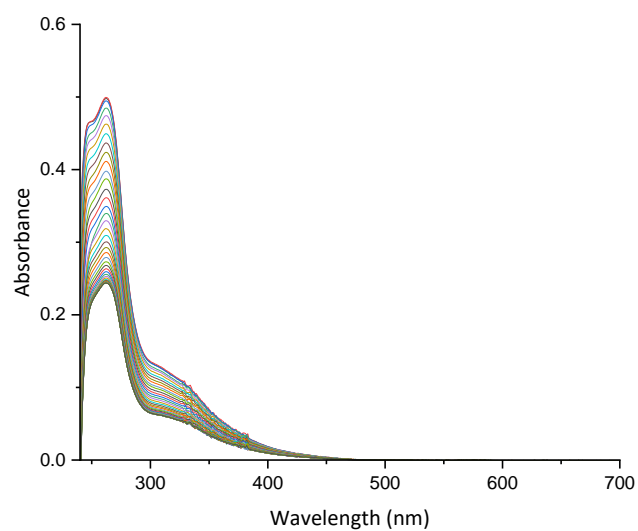

**Figure S39:** UV-Vis spectra of **3b** in PBS (1% DMF), 30 min intervals over 24 h.

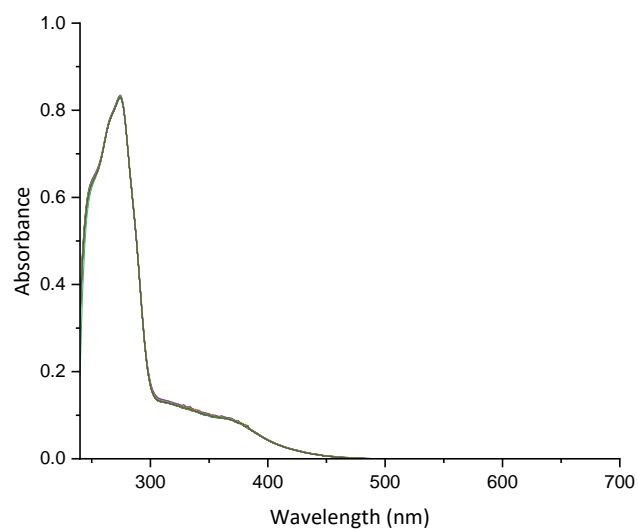

**Figure S40:** UV-Vis spectra of **3c** in PBS (1% DMF), 30 min intervals over 24 h.

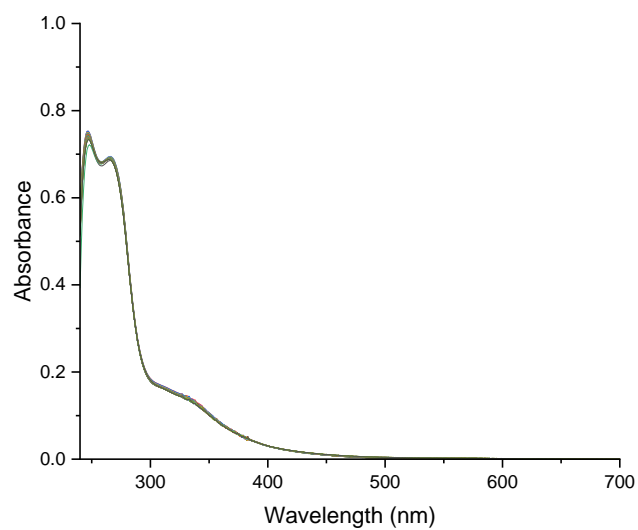

**Figure S41:** UV-Vis spectra of **3d** in PBS (1% DMF), 30 min intervals over 24 h.

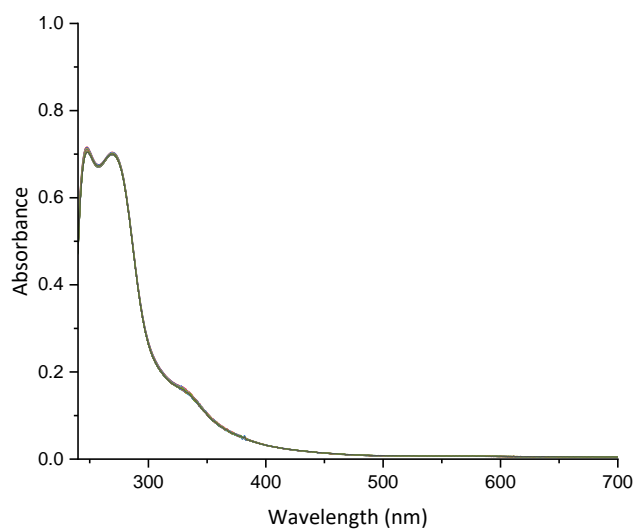

**Figure S42:** UV-Vis spectra of **3e** in PBS (1% DMF), 30 min intervals over 24 h.

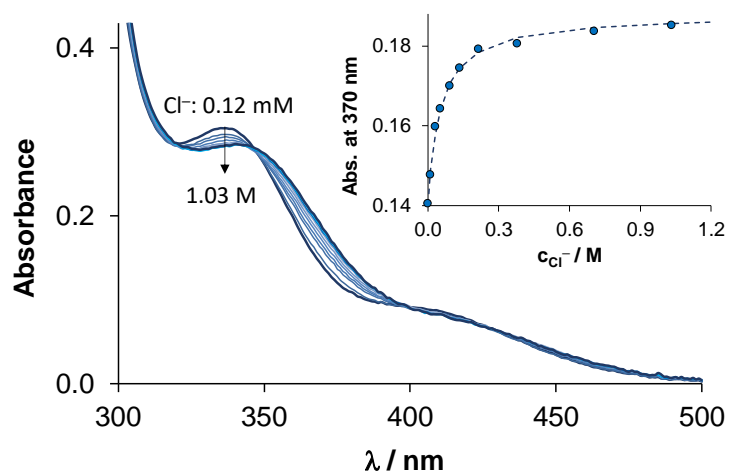

**Figure S43:** UV-vis absorption spectra of **2c** at various chloride ion (KCl) concentrations. Inserted figure shows the changes of absorbance at 370 nm ( $c_{\text{complex}} = 120 \mu\text{M}$ ; pH 7.4 (20 mM phosphate, 1% DMF); 25 °C).

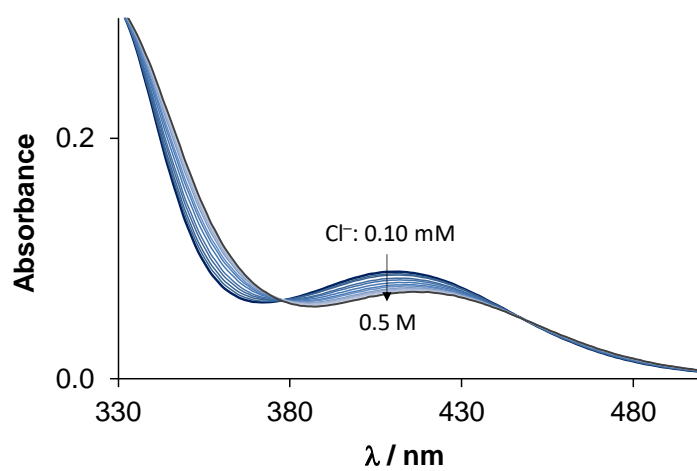

**Figure S44:** UV-vis absorption spectra of **2a** at various chloride ion (KCl) concentrations. ( $c_{\text{complex}} = 102 \mu\text{M}$ ; pH 7.4 (20 mM phosphate, 1% DMF); 25 °C).

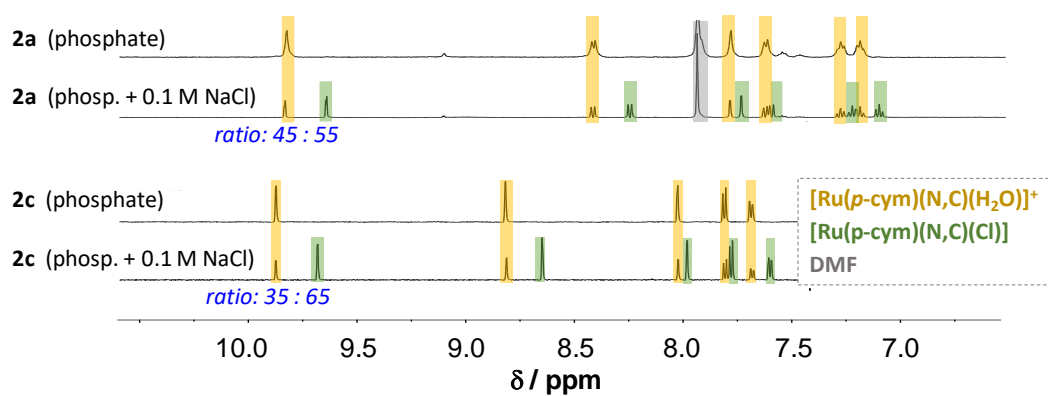

**Figure S45:**  $^1\text{H}$  NMR spectra of **2a** and **2c** at pH 7.4 prepared in 20 mM phosphate buffer and in phosphate buffer containing 0.1 M NaCl and recorded after 15 min.  $\{c_{\text{complex}} = 1 \text{ mM}; \text{ samples of } \mathbf{2a} \text{ contained } 10\%(\text{v/v}) \text{ DMF-}d^7; \mathbf{2c} \text{ contained } 10\%(\text{v/v}) \text{ D}_2\text{O}; 25 \text{ }^\circ\text{C}\}$ .

## 6. MTT-Assays

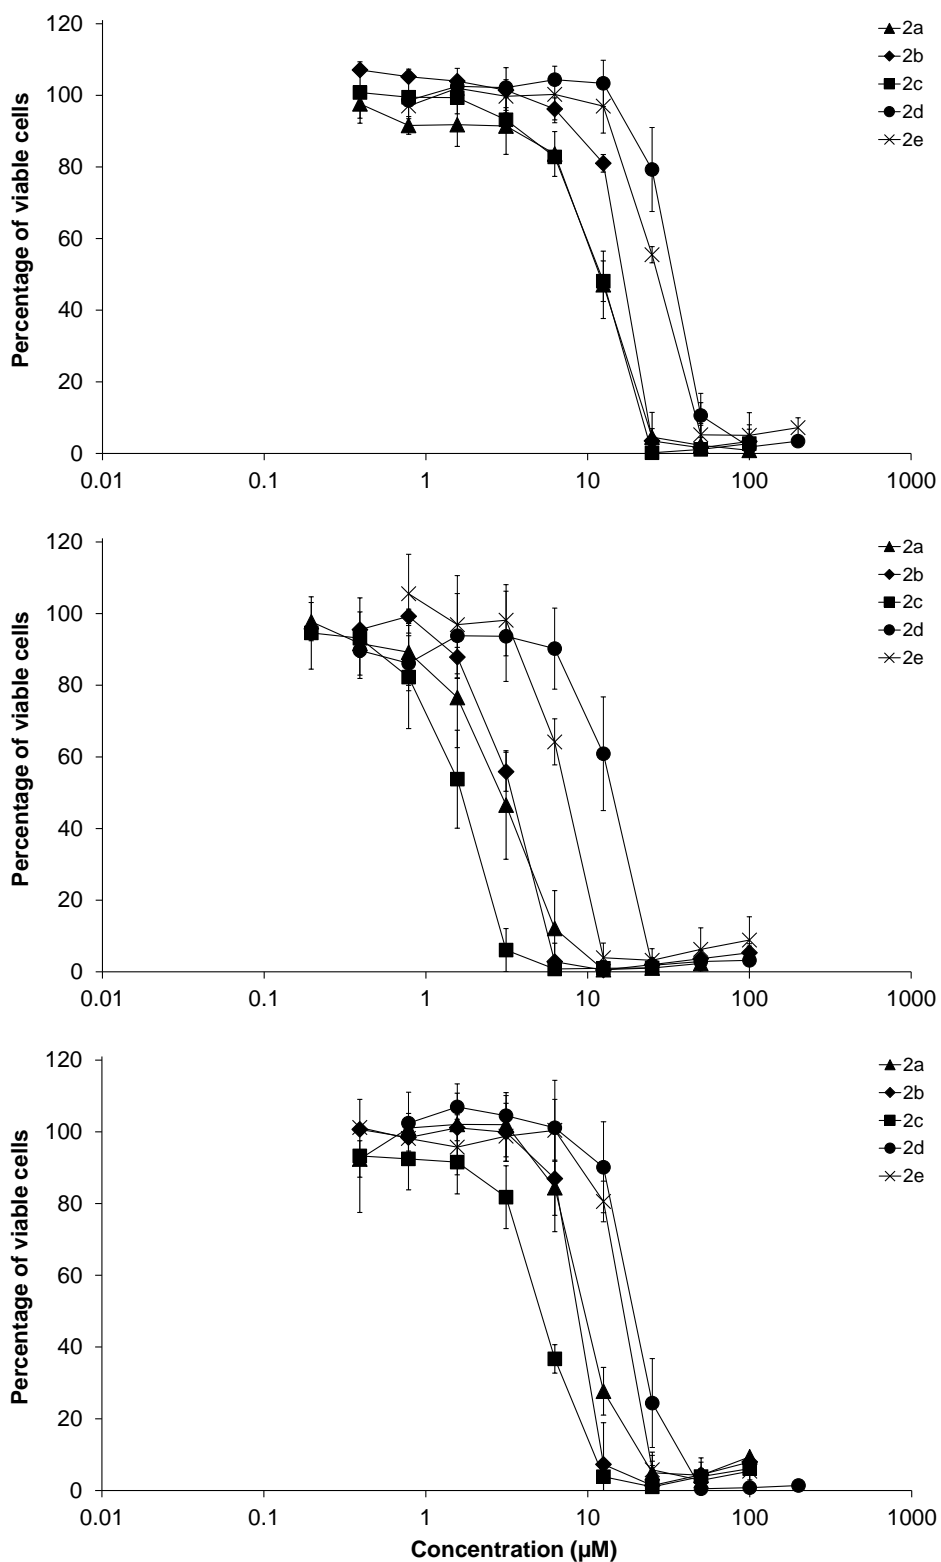

**Figure S46:** Concentration-effect curves of ruthenium complexes **2a–2e** in A549 (top), CH1/PA-1 (center) and SW480 cells (bottom) relative to untreated controls (100%). Values are means  $\pm$  standard deviations from at least three independent MTT assays (exposure time: 96 h).

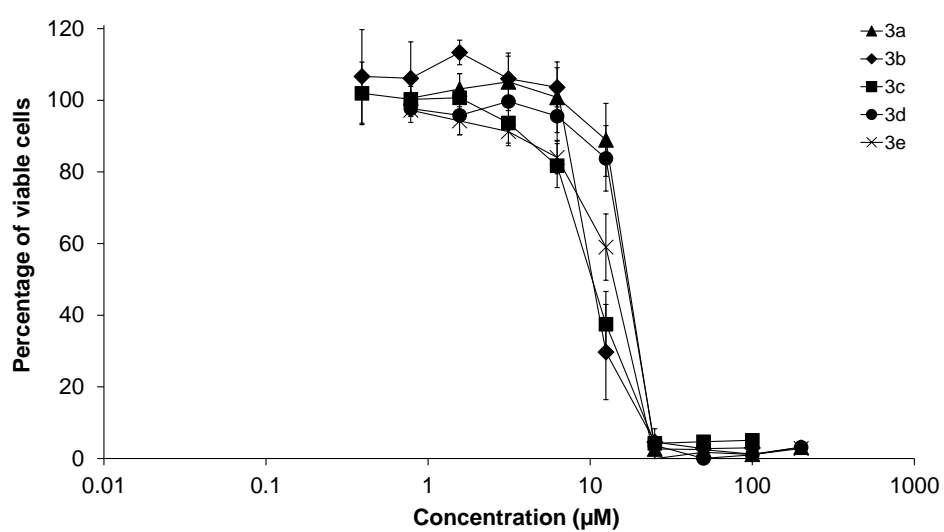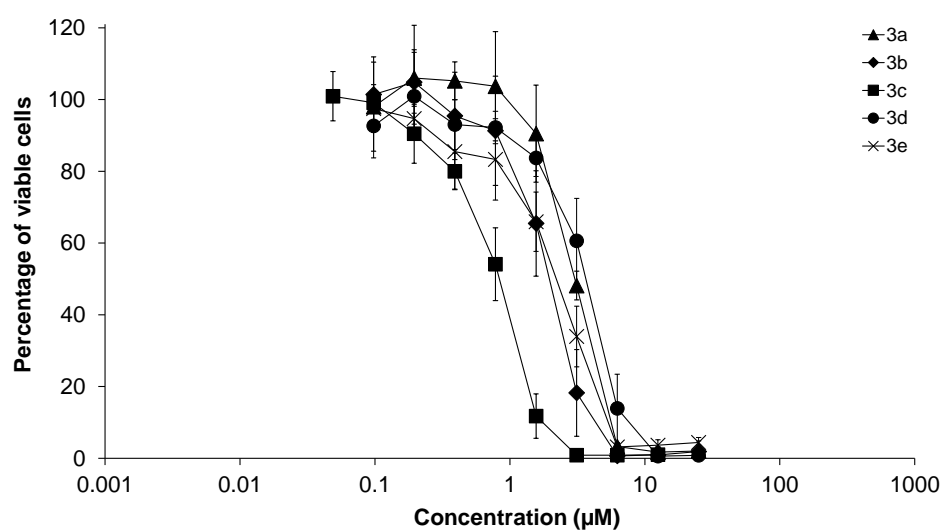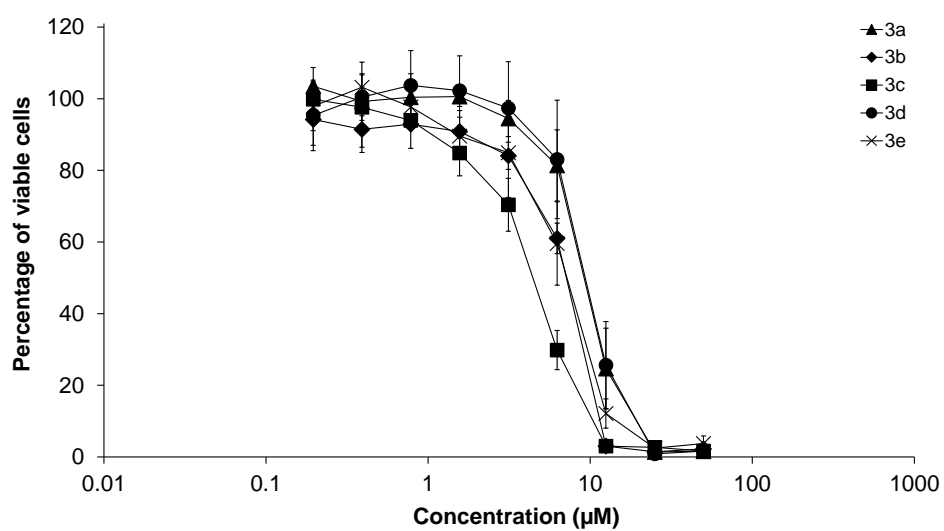

**Figure S47:** Concentration-effect curves of osmium complexes **3a–3e** in A549 (top), CH1/PA-1 (center) and SW480 cells (bottom) relative to untreated controls (100%). Values are means  $\pm$  standard deviations from at least three independent MTT assays (exposure time: 96 h).



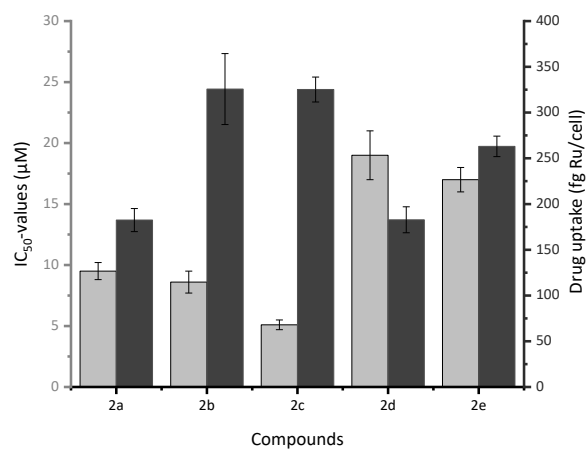

**Figure S48:** Dependency of cytotoxicity (IC<sub>50</sub> values, light grey) on cellular accumulation (Ru/cell, dark grey) of ruthenacycles **2a-e**.

## 7. G-quadruplex interaction studies

**Table S9:** Oligonucleotide sequences. In dsDNA, Heg linker is  $[(-CH_2-CH_2-O)_6]$ .

| Name                 | Sequence                                                   |
|----------------------|------------------------------------------------------------|
| <i>c-KIT1</i> (FRET) | 5'-/56-FAM/AGG GAG GGC GCT GGG AGG AGG G/36 TAMSp/3'       |
| <i>c-MYC</i> (FRET)  | 5'-/56-FAM/TGG GGA GGG TGG GGA GGG TGG GCA AGG/36 TAMSp/3' |
| dsDNA (FRET)         | 5'-/56-FAM/ TAT AGC TA-Heg-TATA GCT ATA /36 TAMSp/3'       |
| <i>c-KIT1</i>        | 5'-AGG GAG GGC GCT GGG AGG AGG G-3'                        |
| <i>c-MYC</i>         | 5'-TGA GGG TGG GTA GGG TGG GTA A-3'                        |

**Table S10:**  $\Delta T_{1/2}$  values of 0.2  $\mu\text{M}$  *c-KIT1*, *c-MYC*, dsDNA upon interaction with metal complexes at 1.0, 2.0, 4.0 and 6.0  $\mu\text{M}$  concentration. The results represent the average of three separate experiments, each conducted in duplicate. Concentration of DNA is reported in strand. Uncertainty is  $\leq 0.5$  for the  $\Delta T_{1/2}$  reported.  $\Delta T_{1/2} < \pm 0.5$  are reported as 0. n.a. = not available.

| <b><i>c-KIT1</i></b> |                                     |                                     |                                     |                                     |
|----------------------|-------------------------------------|-------------------------------------|-------------------------------------|-------------------------------------|
|                      | <b>1.0 <math>\mu\text{M}</math></b> | <b>2.0 <math>\mu\text{M}</math></b> | <b>4.0 <math>\mu\text{M}</math></b> | <b>6.0 <math>\mu\text{M}</math></b> |
| <b>2a</b>            | -0.6                                | -0.6                                | 1.2                                 | 12.7                                |
| <b>2c</b>            | -0.7                                | -1.4                                | -1.4                                | 0                                   |
| <b>2d</b>            | -1.3                                | -2.2                                | 1.7                                 | 9.0                                 |
| <b><i>c-MYC</i></b>  |                                     |                                     |                                     |                                     |
|                      | <b>1.0 <math>\mu\text{M}</math></b> | <b>2.0 <math>\mu\text{M}</math></b> | <b>4.0 <math>\mu\text{M}</math></b> | <b>6.0 <math>\mu\text{M}</math></b> |
| <b>2a</b>            | 0.9                                 | 2.5                                 | 8.4                                 | 14.3                                |
| <b>2c</b>            | 3.5                                 | 8.6                                 | 15.0                                | 18.0                                |
| <b>2d</b>            | 1.1                                 | 1.9                                 | 6.1                                 | 11.2                                |
| <b>dsDNA</b>         |                                     |                                     |                                     |                                     |
|                      | <b>1.0 <math>\mu\text{M}</math></b> | <b>2.0 <math>\mu\text{M}</math></b> | <b>4.0 <math>\mu\text{M}</math></b> | <b>6.0 <math>\mu\text{M}</math></b> |
| <b>2a</b>            | n.a.                                | n.a.                                | 0                                   | n.a.                                |
| <b>2c</b>            | n.a.                                | n.a.                                | 0                                   | n.a.                                |
| <b>2d</b>            | n.a.                                | n.a.                                | 0                                   | n.a.                                |

**Table S11:** Docking free energies of binding with *c-KIT1* G4.

|               | Kcal/mol (1 <sup>st</sup> pose) | Kcal/mol (2 <sup>nd</sup> pose) | Kcal/mol (3 <sup>rd</sup> pose) |
|---------------|---------------------------------|---------------------------------|---------------------------------|
| <b>2a (R)</b> | -7.48                           | -7.06                           | -7.01                           |
| <b>2a (S)</b> | -6.37                           | -5.92                           | -5.90                           |
| <b>2c (R)</b> | -8.61                           |                                 |                                 |
| <b>2c (S)</b> | -7.84                           | -7.80                           | -7.53                           |
| <b>2d (R)</b> | -7.97                           | -7.20                           | -6.57                           |
| <b>2d (S)</b> | -6.73                           | -6.45                           | -6.20                           |

**Table S12:** Docking free energies of binding with *c-MYC* G4.

|               | Kcal/mol (1 <sup>st</sup> pose) | Kcal/mol (2 <sup>nd</sup> pose) | Kcal/mol (3 <sup>rd</sup> pose) |
|---------------|---------------------------------|---------------------------------|---------------------------------|
| <b>2a (R)</b> | -7.77                           | -7.65                           |                                 |
| <b>2a (S)</b> | -7.55                           | -6.72                           | -6.41                           |
| <b>2c (R)</b> | -9.04                           | -8.66                           |                                 |
| <b>2c (S)</b> | -8.72                           | -8.20                           |                                 |
| <b>2d (R)</b> | -7.97                           | -7.69                           |                                 |
| <b>2d (S)</b> | -8.01                           | -7.10                           | -6.81                           |

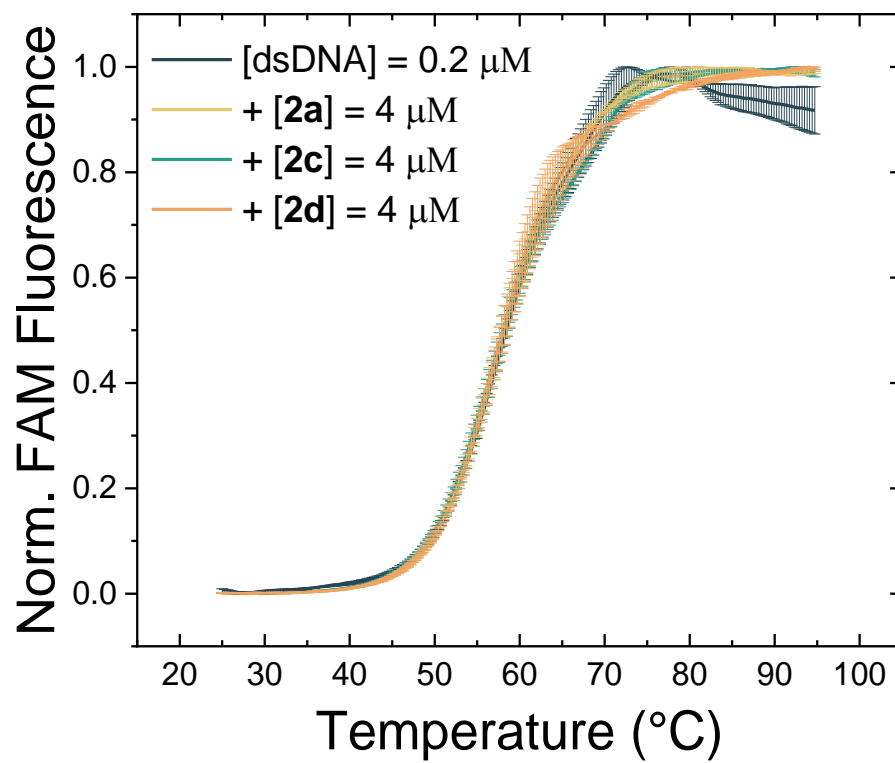

**Figure S49:** FRET melting profiles of dsDNA oligonucleotide (0.2 μM) upon interaction with the indicated compounds at the indicated concentration.

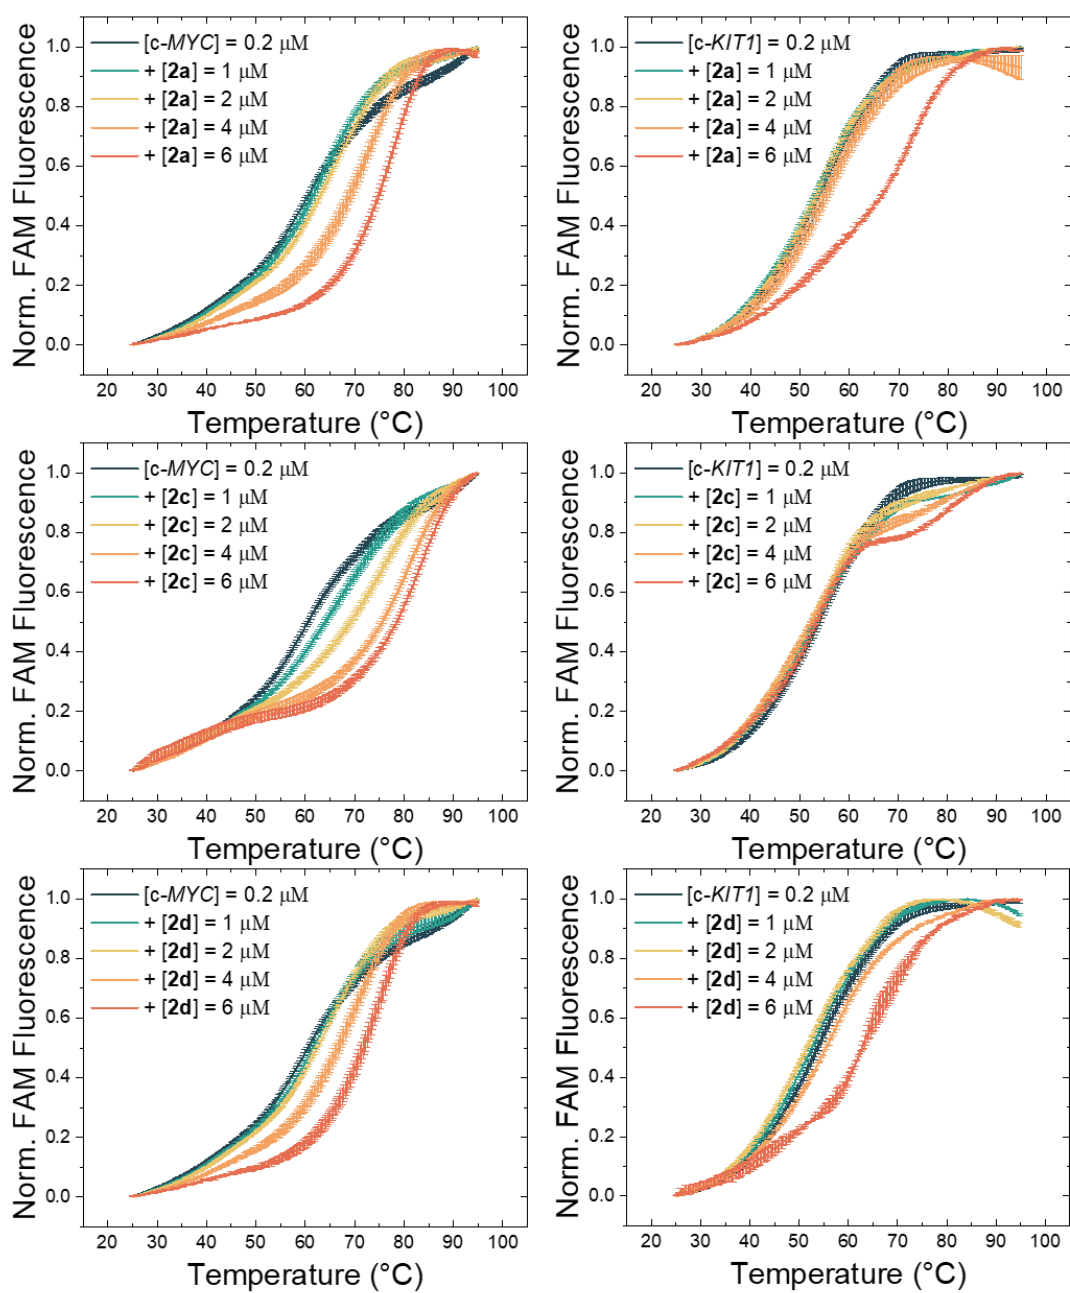

**Figure S50:** FRET melting profiles of *c-MYC* and *c-KIT1* G4s (0.2 μM) upon interaction with the indicated compounds at the indicated concentration values.

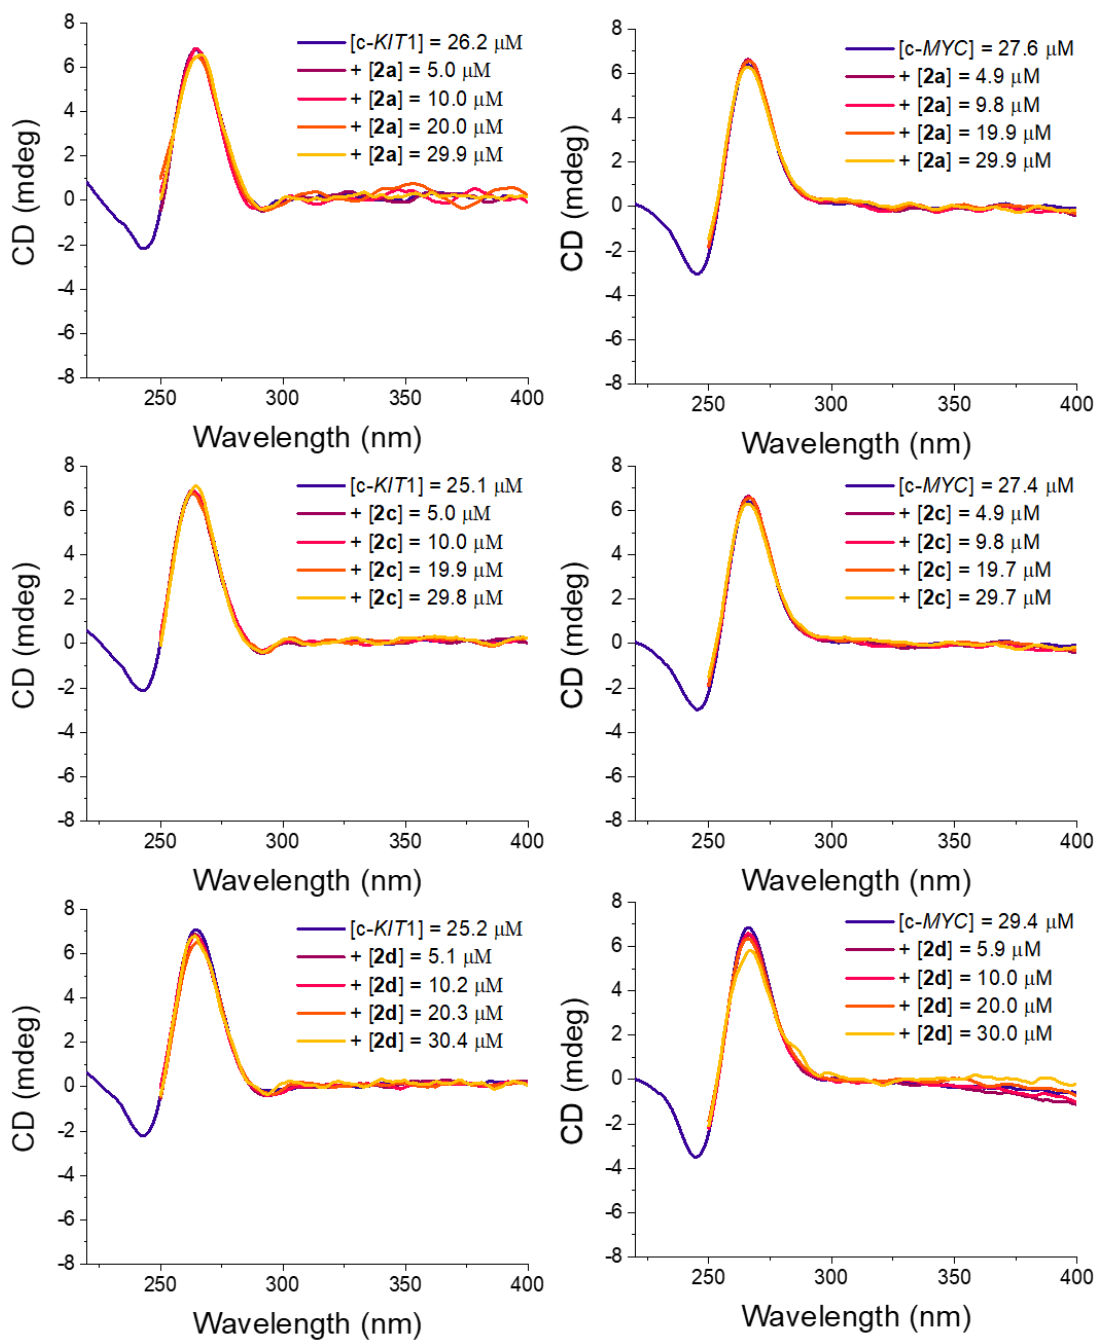

**Figure S51:** CD spectra of *c-KIT1* (left column) and *c-MYC* (right column) in the presence of increasing aliquots of **2a**, **2c** and **2d** at the indicated concentrations. Concentration of the oligonucleotides is reported in bases. When the metal-based compounds are in solution, the cut-off of the spectra was set at 250 nm due to the presence of DMF as co-solvent (% < 1.7%).

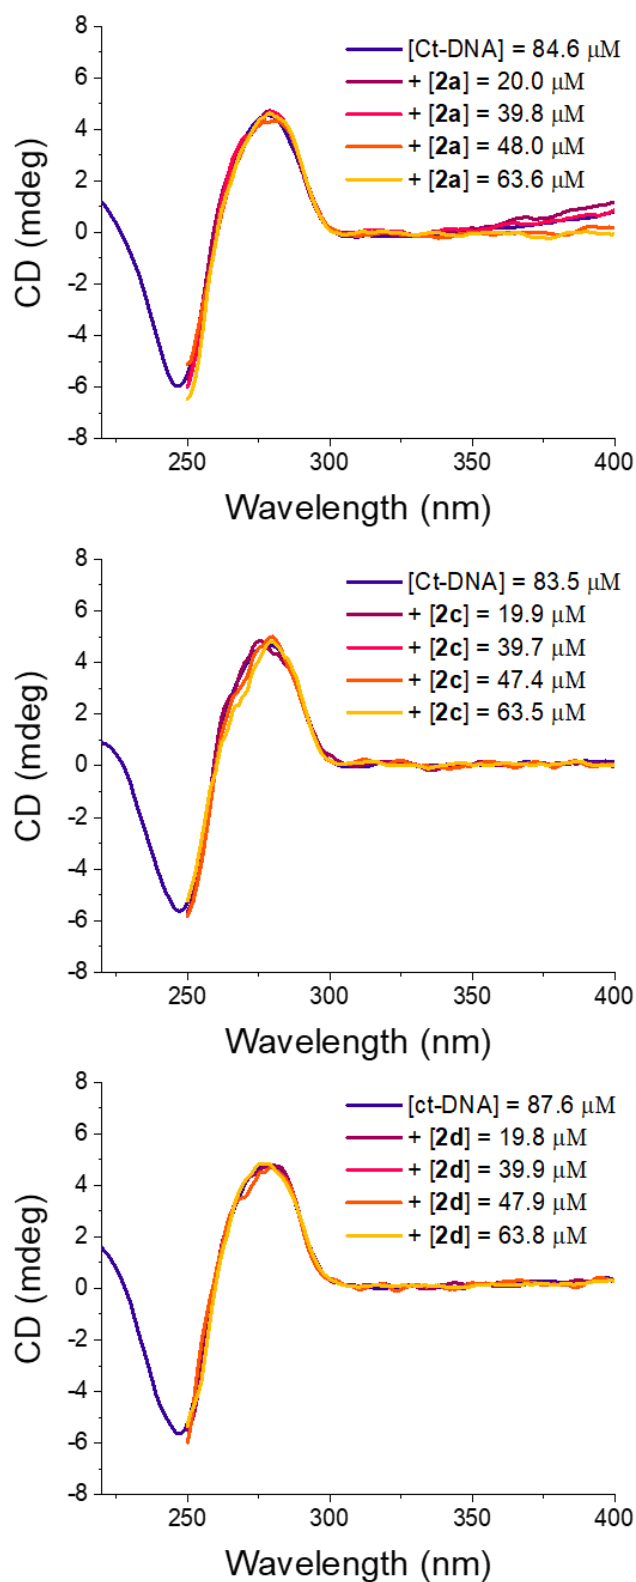

**Figure S52:** CD spectra of ct-DNA in the presence of increasing aliquots of **2a**, **2c** and **2d** at the indicated concentrations. Concentration of ct-DNA is reported in bases. When the metal-based compounds are in solution, the cut-off of the spectra was set at 250 nm due to the presence of DMF as co-solvent (% < 1.7%).

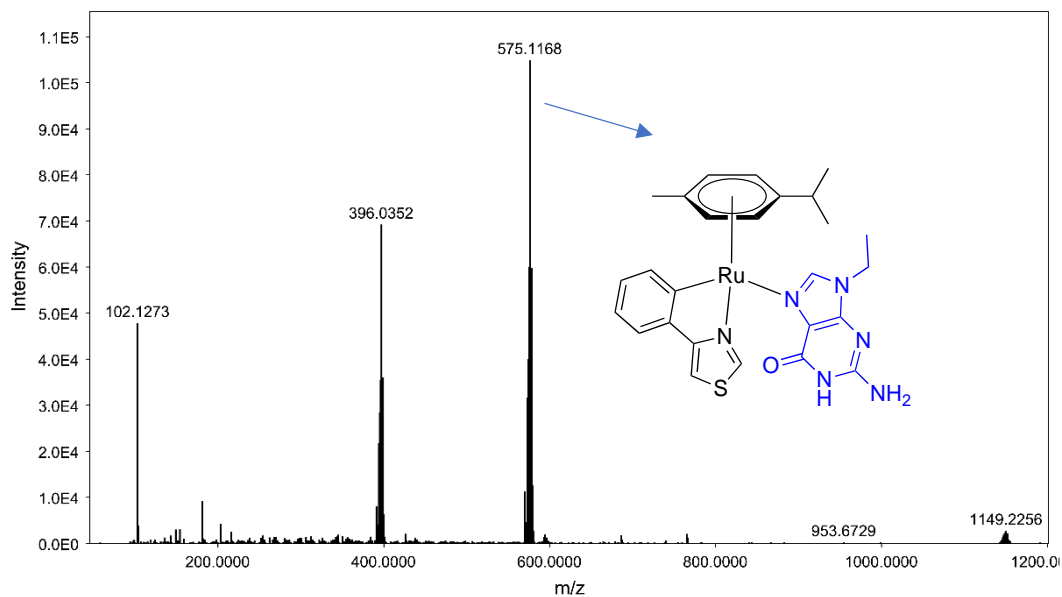

**Figure S53:** Mass spectrum of 9-ethylguanine incubated with **2a**. Final concentrations in MeOH/H<sub>2</sub>O before injection were 0.2 mM for the metal compound and 0.6 mM for 9-EtG. Mass of 9-EtG-**2a** adduct: found 575.1168, calcd.: 575.1167.

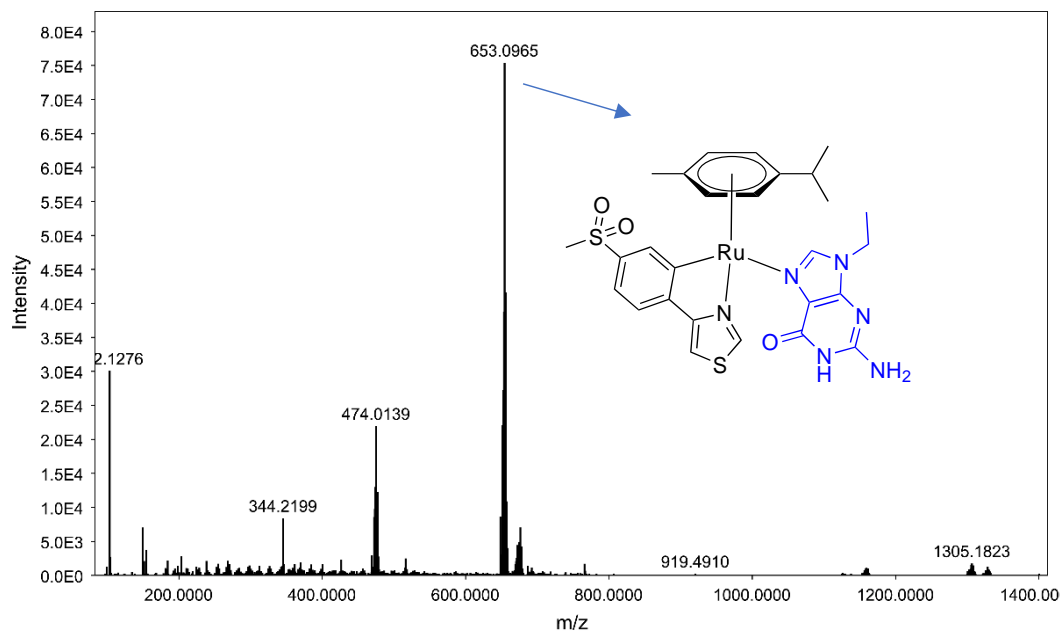

**Figure S54:** Mass spectrum of 9-ethylguanine incubated with **2c**. Final concentrations in MeOH/H<sub>2</sub>O before injection were 0.2 mM for the metal compound and 0.6 mM for 9-EtG. Mass of 9-EtG-**2c** adduct: found 653.0995, calcd.: 653.0943.

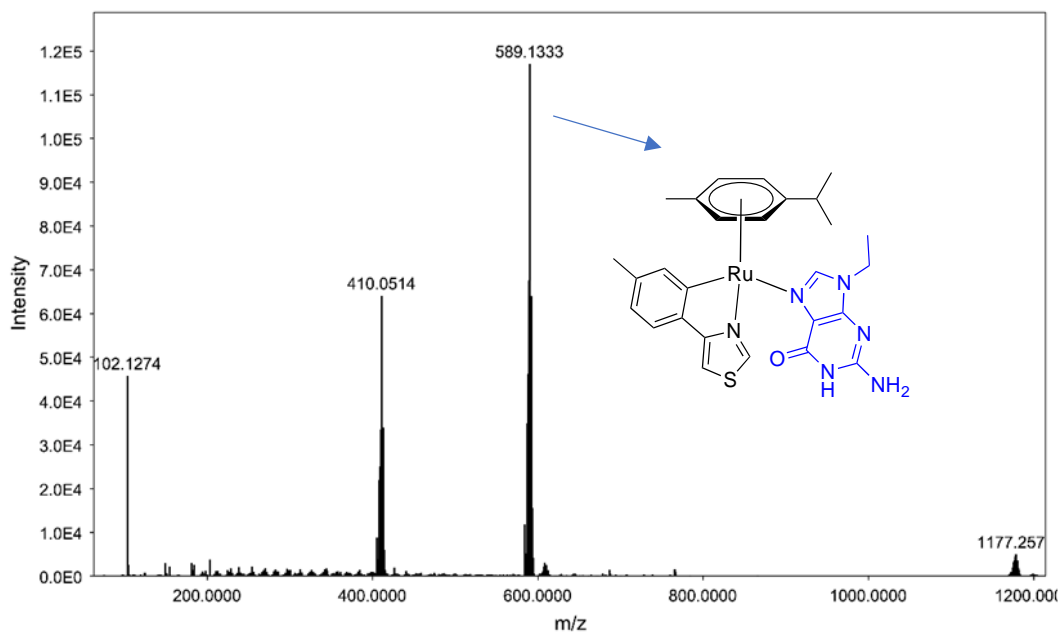

**Figure S55:** Mass spectrum of 9-ethylguanine incubated with **2d**. Final concentrations in MeOH/H<sub>2</sub>O before injection were 0.2 mM for the metal compound and 0.6 mM for 9-EtG. Mass of 9-EtG-**2d** adduct: found 589.1333, calcd.: 589.1324.

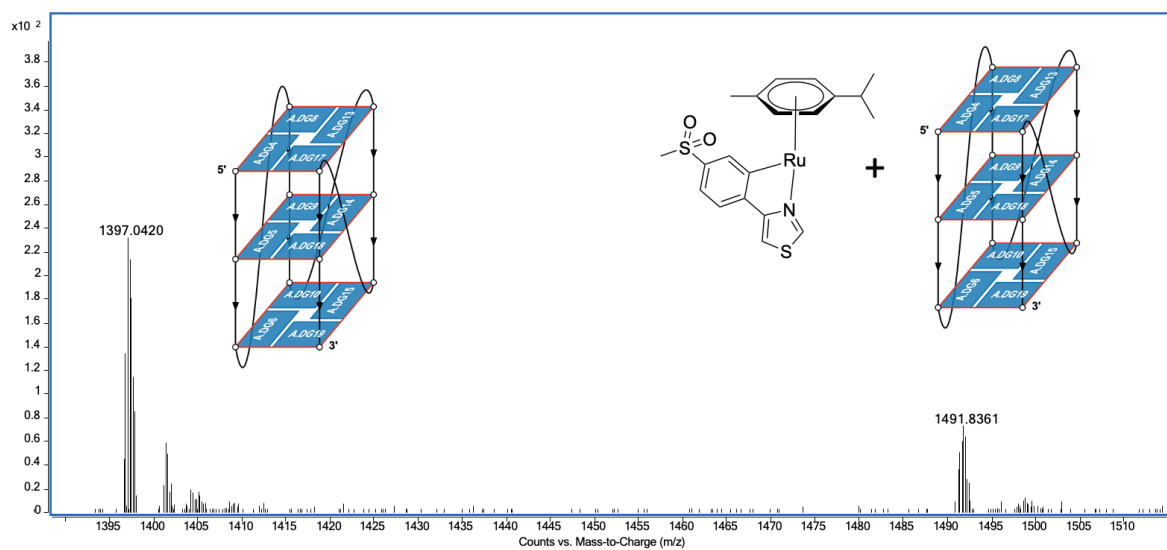

**Figure S56:** Mass Spectrum of **2c** incubated with c-MYC for 2 h at room temperature. Five charged mass of c-MYC: found: 1397.2403, calcd.: 1397.2318 (M-H<sup>-</sup> for C<sub>220</sub>H<sub>270</sub>O<sub>131</sub>N<sub>95</sub>P<sub>21</sub>). Five charged mass of **2c**-c-MYC adduct: found: 1491.8361, calcd.: 1491.8332 (M-H<sup>-</sup> for C<sub>220</sub>H<sub>270</sub> O<sub>131</sub> N<sub>95</sub>P<sub>21</sub>C<sub>20</sub>H<sub>21</sub>NO<sub>2</sub>RuS<sub>2</sub>).



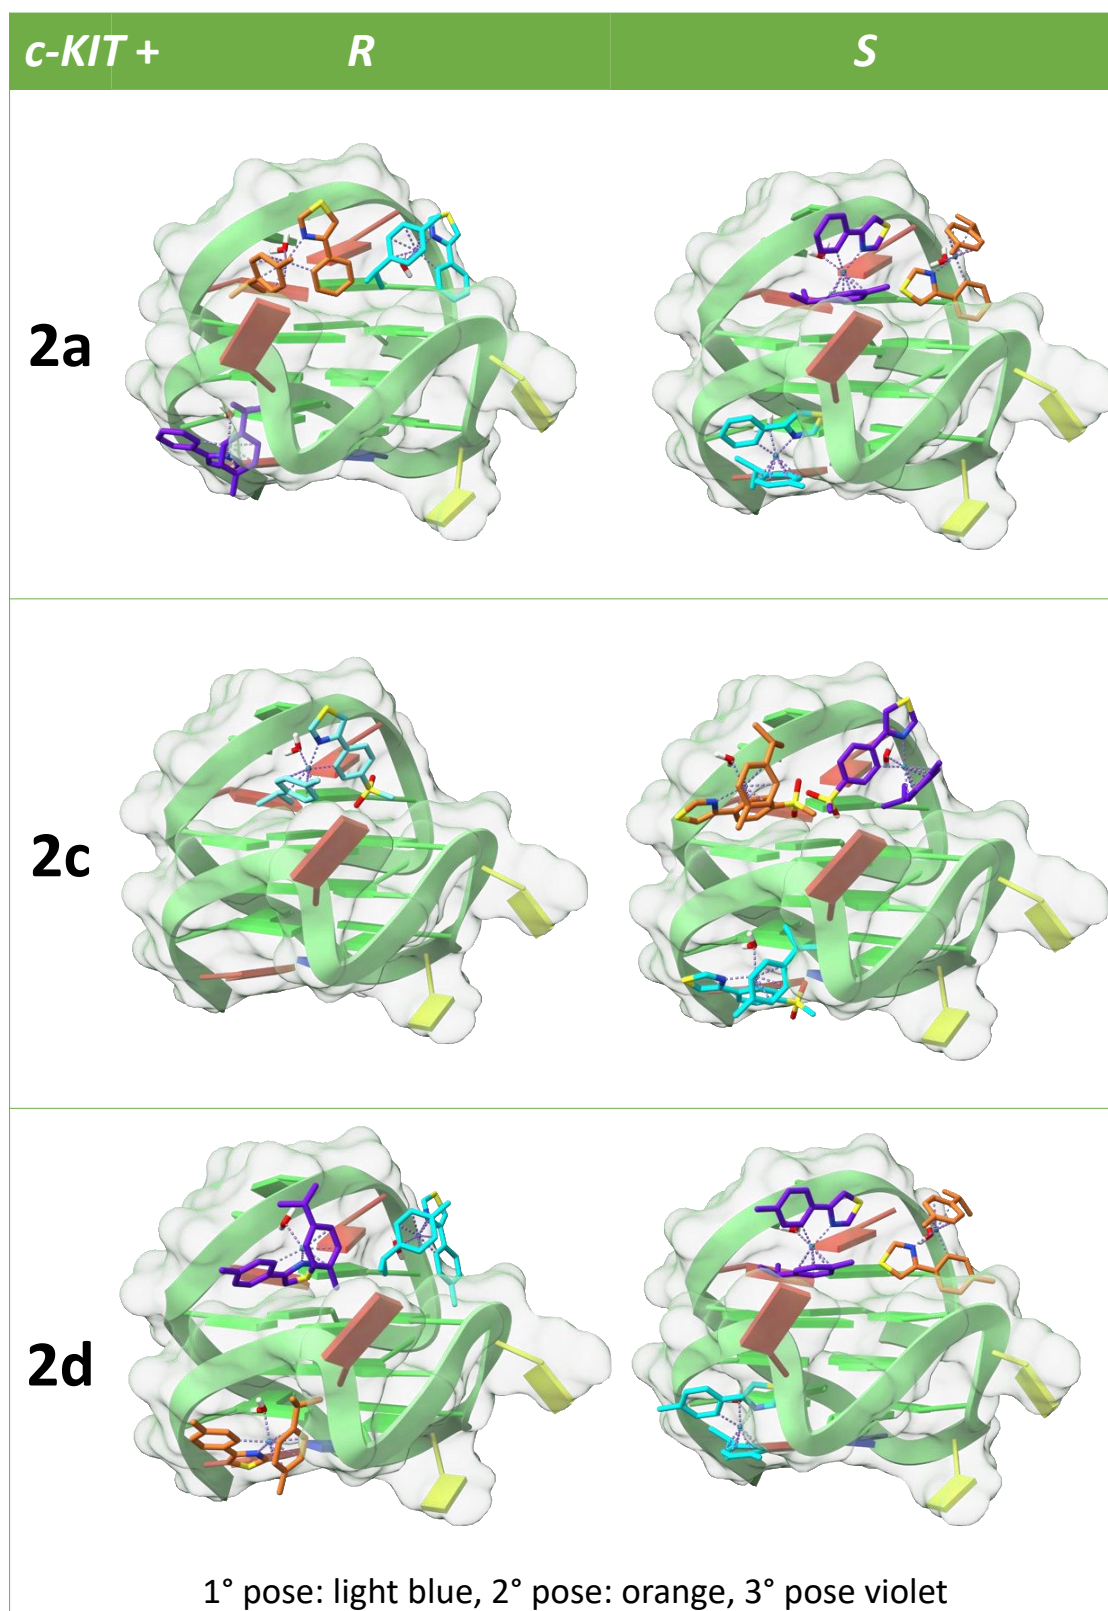

**Figure S57:** Cartoons showing possible binding sites of both enantiomers of **2a**, **2c** and **2d** with *c-KIT1* G4 (PDB id: 2O3M).

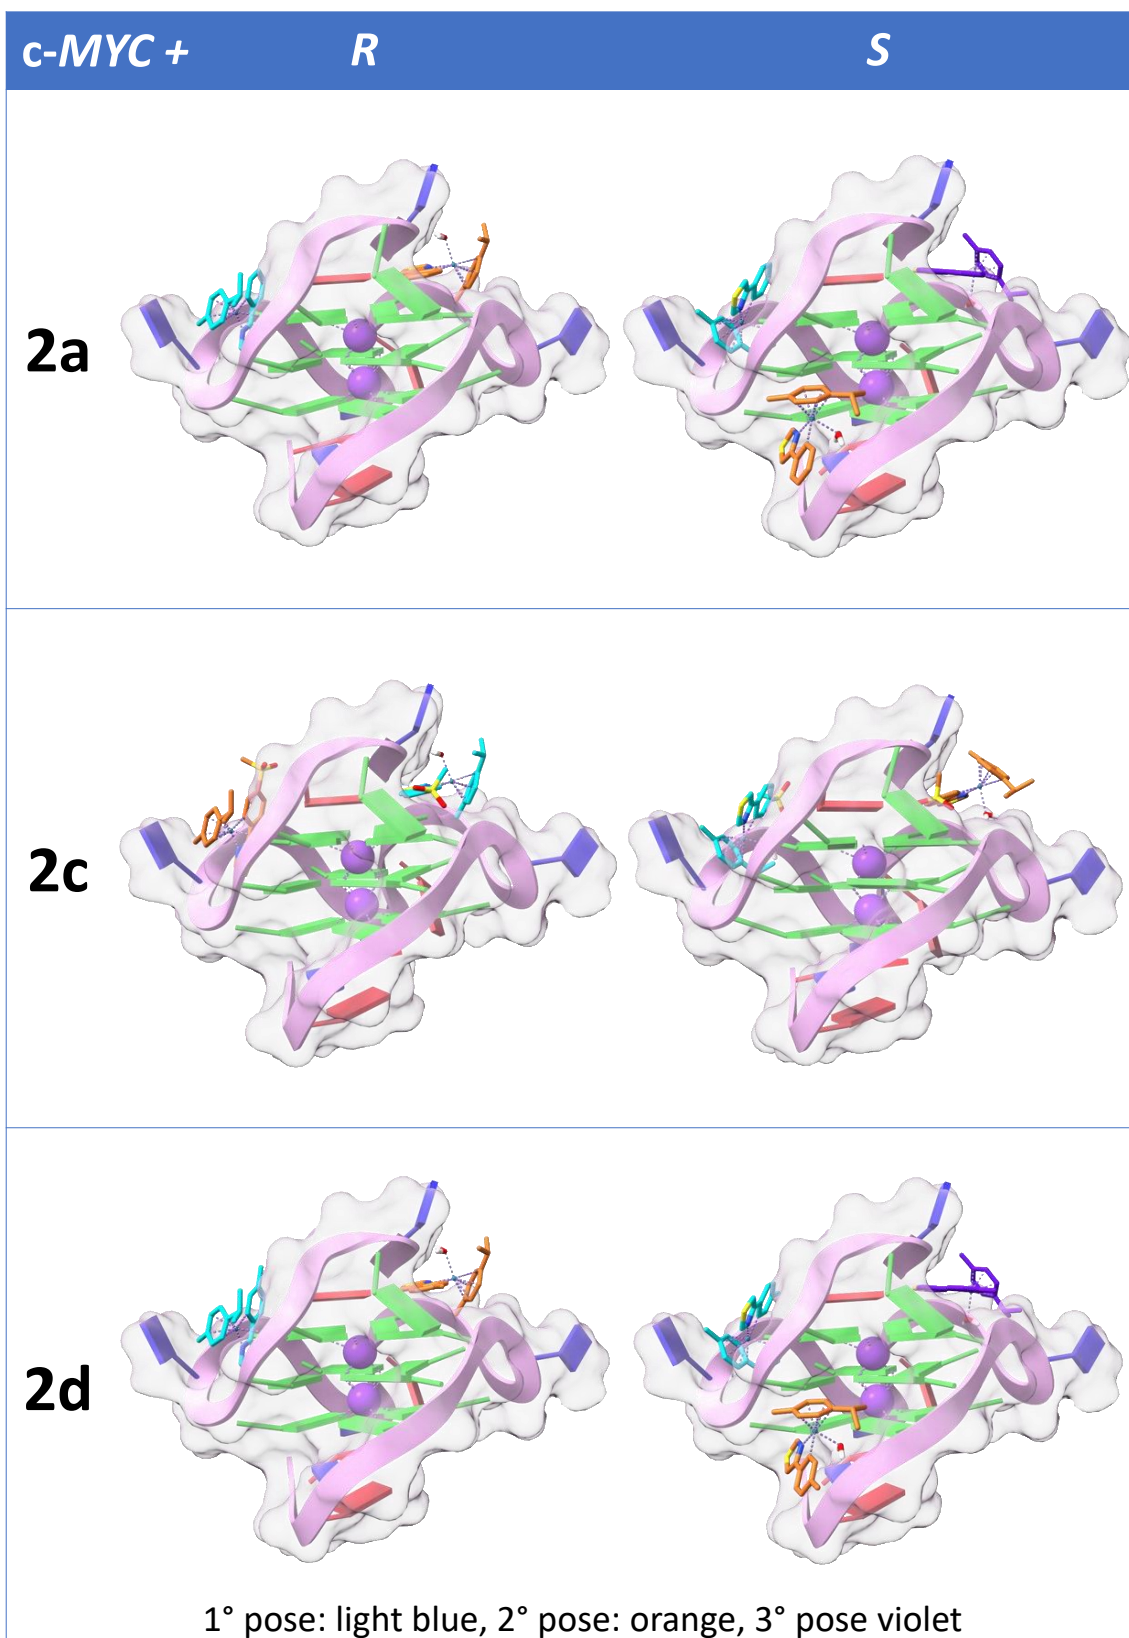

**Figure S58:** Cartoons showing possible binding sites of both enantiomers of **2a**, **2c** and **2d** with c-MYC G4 (PDB id: 1XAV).

## 8. Amino acid interaction study

Histidine

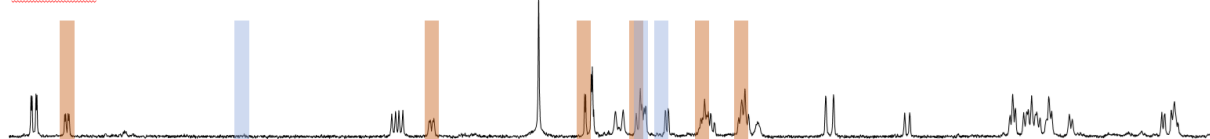

Cysteine

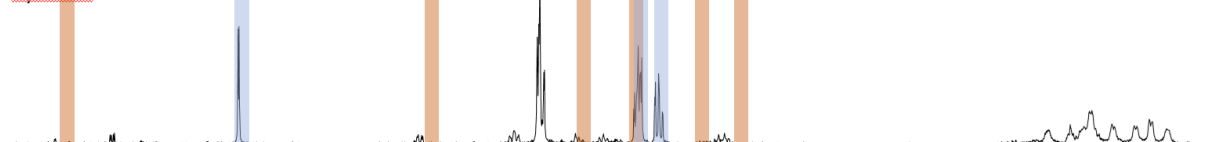

Methionine

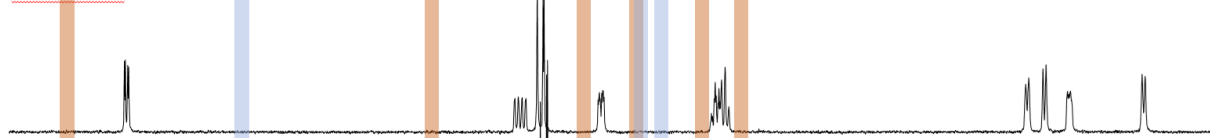

AA-mix

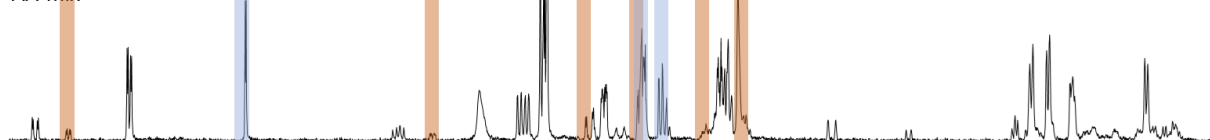

9.8 9.6 9.4 9.2 9.0 8.8 8.6 8.4 8.2 8.0 7.8 7.6 7.4 7.2 7.0 6.8 6.6 6.4 6.2 6.0 5.8 5.6 5.4 5.2

$\delta$  (ppm)

**Figure S59:**  $^1\text{H-NMR}$  (10%  $d_7$ -DMF in  $\text{D}_2\text{O}$ , aromatic region) of **2a** incubated with protected amino acids histidine (first row), cysteine (second row), methionine (third row) and a 1:1:1 mixture of the mentioned amino acids for 24 h (red bar = protons of unconverted **2a**, blue bar = protons of free ligand **1a**).

Histidine

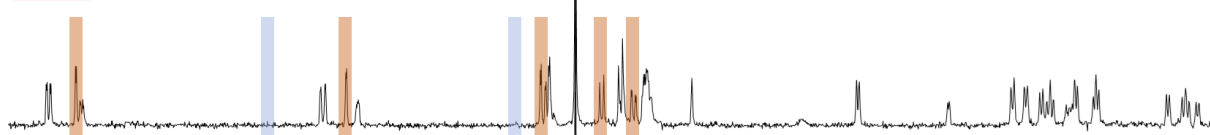

Cysteine

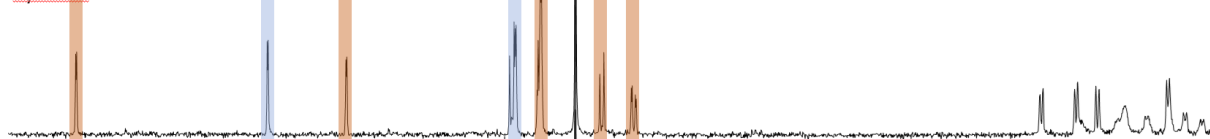

Methionine

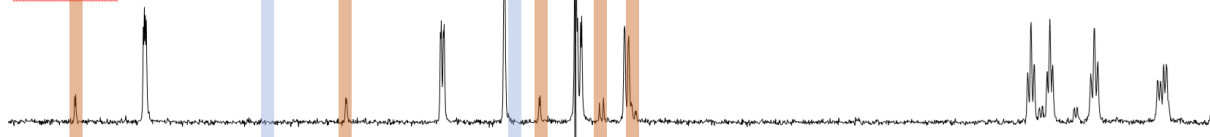

AA-mix

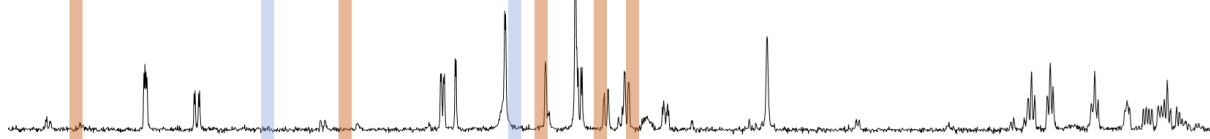

10.0 9.8 9.6 9.4 9.2 9.0 8.8 8.6 8.4 8.2 8.0 7.8 7.6 7.4 7.2 7.0 6.8 6.6 6.4 6.2 6.0 5.8 5.6 5.4

**Figure S60:**  $^1\text{H-NMR}$  (10%  $d_7$ -DMF in  $\text{D}_2\text{O}$ , aromatic region) of **2c** incubated with protected amino acids histidine (first row), cysteine (second row), methionine (third row) and a 1:1:1 mixture of the mentioned amino acids for 24 h (red bar = protons of unconverted **2c**, blue bar = protons of free ligand **1c**).

## 9. Cell cycle investigation

**Table S13:** Cell cycle analyses results (exposure time: 24 h). Cell cycle phase distribution: G1/G0, S and G2/M relative count frequency (in %). The results are means  $\pm$  standard deviations.

| Conc., $\mu\text{M}$ | Negative control | 2c         |            |             | 2d         |            |            | 3c         |             |            | 3d         |            |            |
|----------------------|------------------|------------|------------|-------------|------------|------------|------------|------------|-------------|------------|------------|------------|------------|
|                      | 0                | 10         | 20         | 40          | 5          | 10         | 20         | 2.5        | 5           | 10         | 2.5        | 5          | 10         |
| G1/G0, %             | 56 $\pm$ 3       | 58 $\pm$ 3 | 46 $\pm$ 9 | 45 $\pm$ 10 | 56 $\pm$ 5 | 54 $\pm$ 2 | 51 $\pm$ 5 | 51 $\pm$ 3 | 40 $\pm$ 8  | 55 $\pm$ 5 | 46 $\pm$ 3 | 53 $\pm$ 6 | 47 $\pm$ 2 |
| S, %                 | 32 $\pm$ 3       | 33 $\pm$ 3 | 28 $\pm$ 1 | 30 $\pm$ 7  | 35 $\pm$ 6 | 28 $\pm$ 4 | 29 $\pm$ 3 | 33 $\pm$ 3 | 45 $\pm$ 11 | 33 $\pm$ 2 | 38 $\pm$ 5 | 35 $\pm$ 5 | 32 $\pm$ 2 |
| G2/M, %              | 16 $\pm$ 2       | 13 $\pm$ 1 | 36 $\pm$ 9 | 21 $\pm$ 2  | 12 $\pm$ 1 | 19 $\pm$ 2 | 24 $\pm$ 5 | 21 $\pm$ 3 | 20 $\pm$ 7  | 17 $\pm$ 6 | 19 $\pm$ 4 | 14 $\pm$ 3 | 23 $\pm$ 3 |

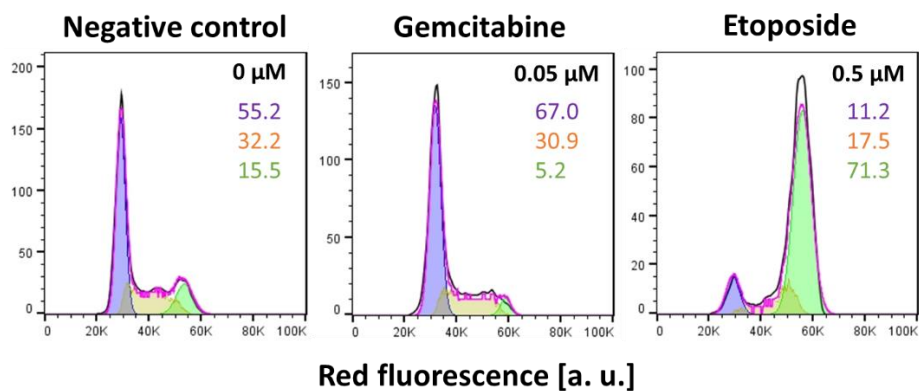

**Figure S61:** The effect of gemcitabine and etoposide on cell cycle frequency distribution. The frequency (Y-axis, counts) is plotted versus red fluorescence intensity of PI-stained SW480 cell nuclei upon 24 h exposure. At given concentrations gemcitabine is inducing the G1/G0 phase inhibition, while etoposide is arresting the cell cycle in G2/M phase.

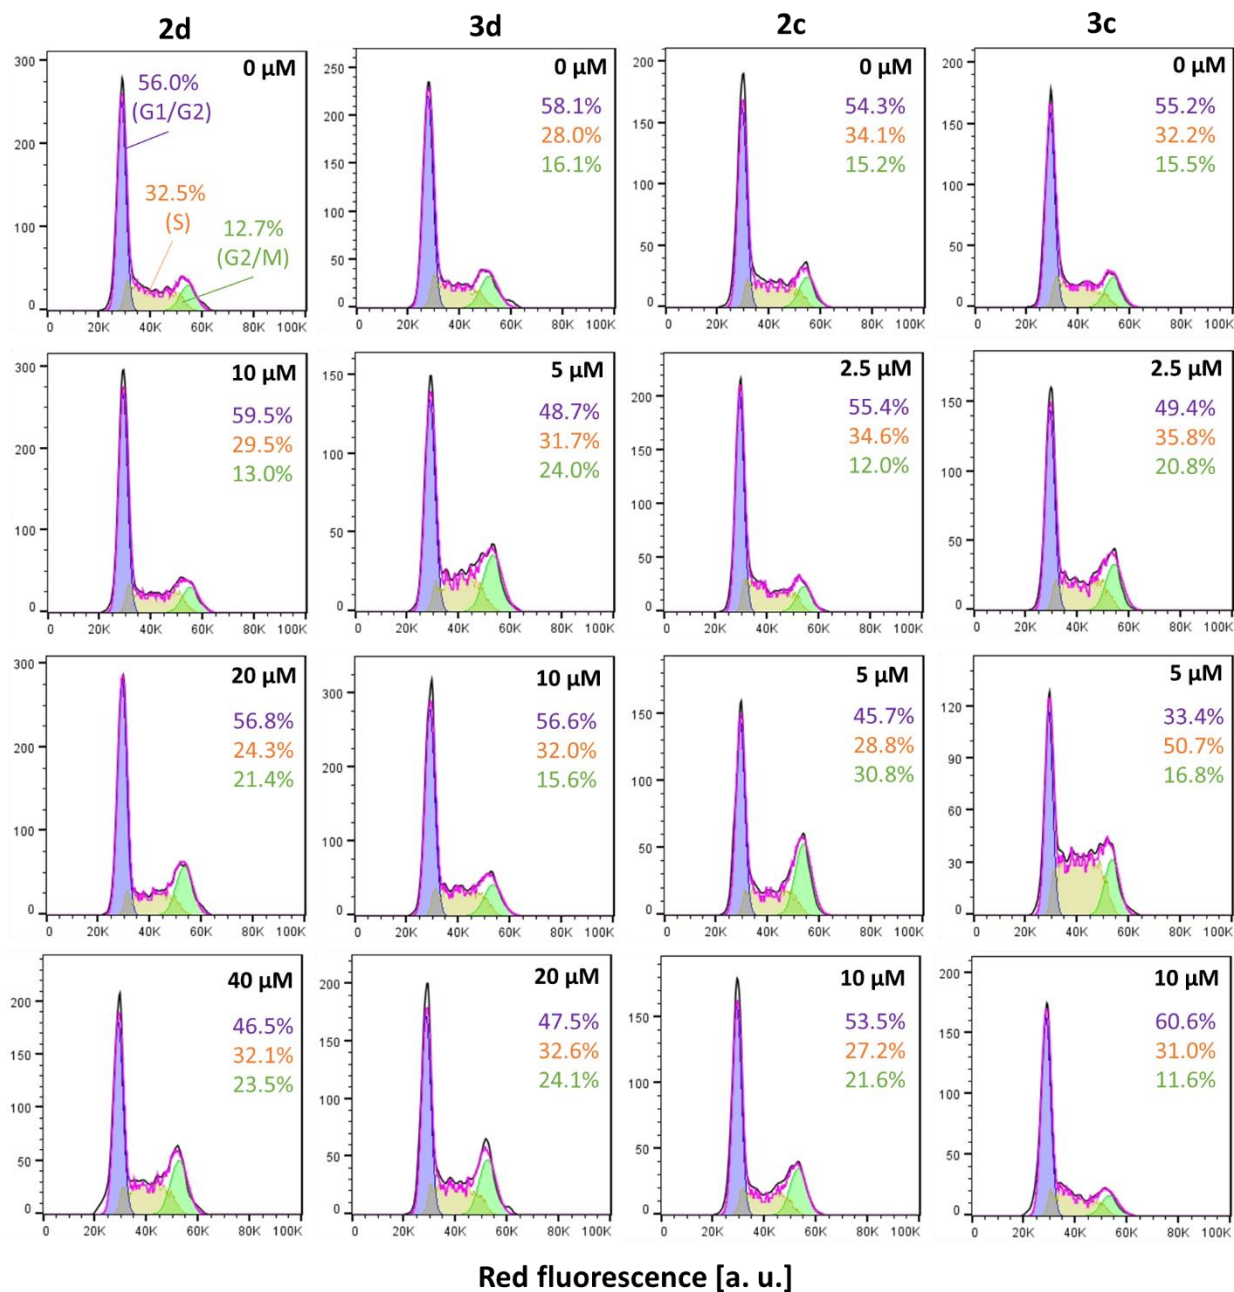

**Figure S62:** Cell cycle frequency distribution histograms (one experiment). The frequency (Y-axis, counts) is plotted versus red fluorescence intensity of PI-stained SW480 cell nuclei upon 24 h incubation with test compounds (**2c,d**, **3c,d**). The stacked values represent the corresponding cell cycle phase distribution in % (G1/G0 – violet, S – orange-yellow, G2/M – green).

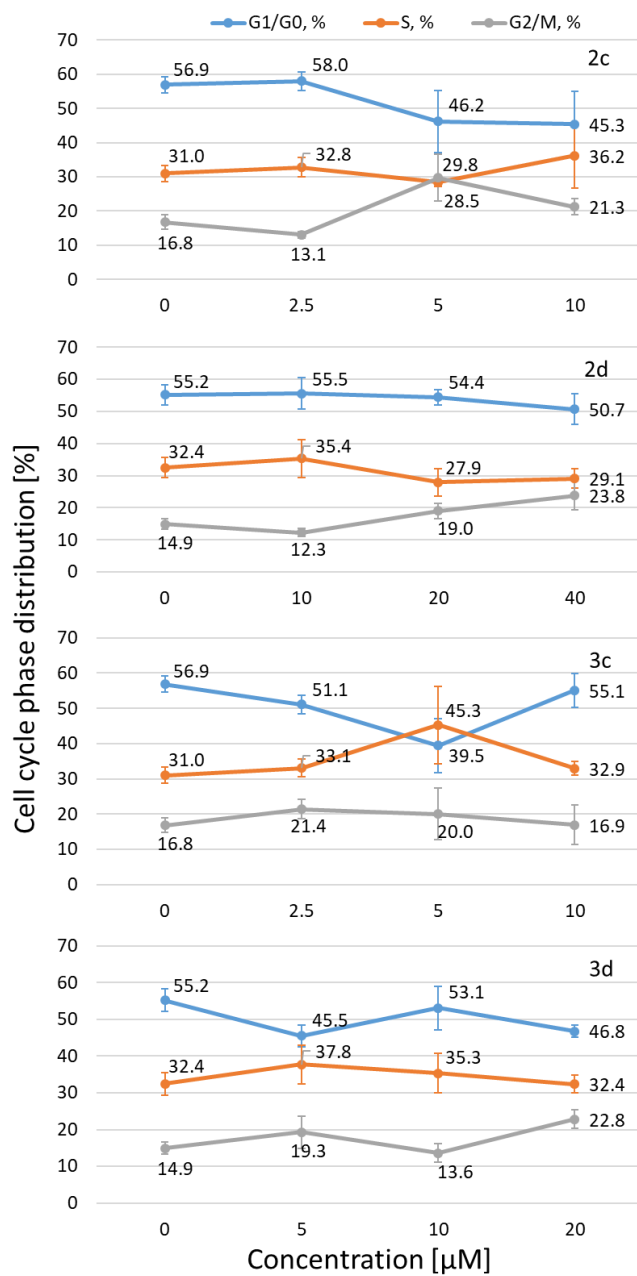

**Figure S63:** The effect of the compounds (**2c,d**, **3c,d**) on SW480 cell cycle phase distribution upon 24 h treatment. The data-points are means of three independent experiments and error bars represent the corresponding standard deviations.

## 10. Apoptosis

**Table S14:** Induction of apoptosis and necrosis of compounds **2c,d** and **3c,d** in SW480 cells after 24 h and 48 h at different concentrations (0.5 x IC<sub>50</sub>, 1 x IC<sub>50</sub>, 2 x IC<sub>50</sub> and 10 x IC<sub>50</sub>).

| compound          | concentration |                           | 24h incubation |      |       | 48h incubation |      |       |
|-------------------|---------------|---------------------------|----------------|------|-------|----------------|------|-------|
|                   |               |                           | average        | stdv | Σ     | average        | stdv | Σ     |
| untreated control |               | necrotic cells [%]        | 1.16           | 0.35 | 2.80  | 0.76           | 0.28 | 1.83  |
|                   |               | late apoptotic cells [%]  | 1.39           | 0.16 |       | 0.86           | 0.35 |       |
|                   |               | early apoptotic cells [%] | 1.40           | 0.45 |       | 0.97           | 0.39 |       |
|                   |               | viable cells [%]          | 96.07          | 0.58 |       | 97.25          | 0.35 |       |
| positive control  | 0.5 μM        | necrotic cells [%]        | 6.32           | 1.66 | 90.04 | 2.38           | 1.20 | 97.05 |
|                   |               | late apoptotic cells [%]  | 89.60          | 1.47 |       | 96.70          | 1.82 |       |
|                   |               | early apoptotic cells [%] | 0.44           | 0.29 |       | 0.35           | 0.12 |       |
|                   |               | viable cells [%]          | 3.63           | 1.63 |       | 0.58           | 0.52 |       |
| <b>2c</b>         | 2.5 μM        | necrotic cells [%]        | 1.10           | 0.41 | 3.05  | 0.99           | 0.41 | 3.28  |
|                   |               | late apoptotic cells [%]  | 1.31           | 0.40 |       | 1.55           | 0.84 |       |
|                   |               | early apoptotic cells [%] | 1.75           | 0.31 |       | 1.73           | 0.17 |       |
|                   |               | viable cells [%]          | 95.87          | 0.81 |       | 95.73          | 1.33 |       |
|                   | 5 μM          | necrotic cells [%]        | 0.97           | 0.03 | 3.33  | 0.83           | 0.30 | 3.70  |
|                   |               | late apoptotic cells [%]  | 1.50           | 0.47 |       | 1.45           | 0.47 |       |
|                   |               | early apoptotic cells [%] | 1.83           | 0.26 |       | 2.25           | 0.46 |       |
|                   |               | viable cells [%]          | 95.70          | 0.36 |       | 95.43          | 0.64 |       |
|                   | 10 μM         | necrotic cells [%]        | 0.90           | 0.25 | 4.10  | 0.87           | 0.22 | 9.65  |
|                   |               | late apoptotic cells [%]  | 1.23           | 0.55 |       | 2.25           | 0.65 |       |
|                   |               | early apoptotic cells [%] | 2.87           | 0.53 |       | 7.41           | 3.03 |       |
|                   |               | viable cells [%]          | 95.00          | 1.11 |       | 89.43          | 3.44 |       |
|                   | 50 μM         | necrotic cells [%]        | 2.85           | 1.02 | 10.31 | 4.63           | 1.90 | 21.41 |
|                   |               | late apoptotic cells [%]  | 8.80           | 2.26 |       | 19.07          | 5.75 |       |
|                   |               | early apoptotic cells [%] | 1.51           | 0.07 |       | 2.34           | 1.02 |       |
|                   |               | viable cells [%]          | 86.83          | 3.33 |       | 73.97          | 7.79 |       |
| <b>2d</b>         | 10 μM         | necrotic cells [%]        | 0.92           | 0.15 | 2.84  | 0.85           | 0.42 | 2.70  |
|                   |               | late apoptotic cells [%]  | 1.57           | 0.98 |       | 1.39           | 0.13 |       |
|                   |               | early apoptotic cells [%] | 1.27           | 0.01 |       | 1.31           | 0.25 |       |
|                   |               | viable cells [%]          | 96.25          | 1.06 |       | 96.45          | 0.78 |       |
|                   | 20 μM         | necrotic cells [%]        | 0.88           | 0.31 | 2.63  | 0.72           | 0.27 | 3.49  |
|                   |               | late apoptotic cells [%]  | 1.18           | 0.43 |       | 1.76           | 1.25 |       |
|                   |               | early apoptotic cells [%] | 1.45           | 0.57 |       | 1.73           | 0.49 |       |
|                   |               | viable cells [%]          | 96.50          | 0.70 |       | 95.77          | 1.96 |       |
|                   | 40 μM         | necrotic cells [%]        | 0.89           | 0.37 | 3.97  | 0.61           | 0.15 | 5.44  |
|                   |               | late apoptotic cells [%]  | 1.97           | 0.54 |       | 1.91           | 0.59 |       |
|                   |               | early apoptotic cells [%] | 2.01           | 1.13 |       | 3.53           | 2.27 |       |
|                   |               | viable cells [%]          | 95.13          | 1.91 |       | 93.97          | 2.91 |       |
|                   | 200 μM        | necrotic cells [%]        | 6.06           | 3.14 |       | 2.10           | 1.23 |       |

|           |             |                           |       |      |       |       |       |       |
|-----------|-------------|---------------------------|-------|------|-------|-------|-------|-------|
|           |             | late apoptotic cells [%]  | 89.47 | 6.18 | 89.80 | 95.93 | 2.64  | 96.91 |
|           |             | early apoptotic cells [%] | 0.33  | 0.16 |       | 0.97  | 0.87  |       |
|           |             | viable cells [%]          | 4.13  | 3.07 |       | 1.01  | 0.60  |       |
| <b>3c</b> | 2.5 $\mu$ M | necrotic cells [%]        | 0.80  | 0.34 | 3.17  | 0.66  | 0.10  | 3.53  |
|           |             | late apoptotic cells [%]  | 1.36  | 0.75 |       | 1.04  | 0.14  |       |
|           |             | early apoptotic cells [%] | 1.81  | 0.59 |       | 2.49  | 0.64  |       |
|           |             | viable cells [%]          | 96.03 | 1.29 |       | 95.80 | 0.53  |       |
|           | 5 $\mu$ M   | necrotic cells [%]        | 0.58  | 0.20 | 2.67  | 0.51  | 0.09  | 4.35  |
|           |             | late apoptotic cells [%]  | 0.94  | 0.43 |       | 1.00  | 0.14  |       |
|           |             | early apoptotic cells [%] | 1.73  | 0.51 |       | 3.35  | 0.52  |       |
|           |             | viable cells [%]          | 96.77 | 0.90 |       | 95.17 | 0.32  |       |
|           | 10 $\mu$ M  | necrotic cells [%]        | 0.60  | 0.15 | 3.64  | 1.32  | 0.19  | 14.43 |
|           |             | late apoptotic cells [%]  | 1.34  | 0.23 |       | 4.13  | 0.49  |       |
|           |             | early apoptotic cells [%] | 2.30  | 1.92 |       | 10.30 | 3.04  |       |
|           |             | viable cells [%]          | 95.77 | 1.96 |       | 84.23 | 2.71  |       |
|           | 50 $\mu$ M  | necrotic cells [%]        | 4.13  | 2.87 | 11.06 | 6.83  | 3.32  | 19.66 |
|           |             | late apoptotic cells [%]  | 8.16  | 5.14 |       | 16.13 | 4.59  |       |
|           |             | early apoptotic cells [%] | 2.90  | 2.89 |       | 3.52  | 1.88  |       |
|           |             | viable cells [%]          | 84.80 | 6.24 |       | 73.50 | 6.27  |       |
| <b>3d</b> | 5 $\mu$ M   | necrotic cells [%]        | 0.77  | 0.21 | 3.17  | 0.56  | 0.07  | 3.26  |
|           |             | late apoptotic cells [%]  | 1.30  | 0.58 |       | 0.96  | 0.17  |       |
|           |             | early apoptotic cells [%] | 1.87  | 0.31 |       | 2.30  | 0.26  |       |
|           |             | viable cells [%]          | 96.07 | 0.85 |       | 96.17 | 0.12  |       |
|           | 10 $\mu$ M  | necrotic cells [%]        | 0.86  | 0.28 | 3.37  | 0.46  | 0.04  | 4.69  |
|           |             | late apoptotic cells [%]  | 1.45  | 0.60 |       | 1.22  | 0.20  |       |
|           |             | early apoptotic cells [%] | 1.91  | 0.92 |       | 3.47  | 1.43  |       |
|           |             | viable cells [%]          | 95.77 | 1.65 |       | 94.87 | 1.50  |       |
|           | 20 $\mu$ M  | necrotic cells [%]        | 1.16  | 0.31 | 9.54  | 1.65  | 0.45  | 24.73 |
|           |             | late apoptotic cells [%]  | 3.15  | 1.13 |       | 10.52 | 4.84  |       |
|           |             | early apoptotic cells [%] | 6.40  | 2.74 |       | 14.21 | 6.27  |       |
|           |             | viable cells [%]          | 89.30 | 4.07 |       | 73.70 | 10.61 |       |
|           | 100 $\mu$ M | necrotic cells [%]        | 7.43  | 1.08 | 91.88 | 4.90  | 1.17  | 92.82 |
|           |             | late apoptotic cells [%]  | 91.53 | 0.83 |       | 88.63 | 7.48  |       |
|           |             | early apoptotic cells [%] | 0.34  | 0.31 |       | 4.19  | 4.91  |       |
|           |             | viable cells [%]          | 0.70  | 0.11 |       | 2.26  | 1.40  |       |



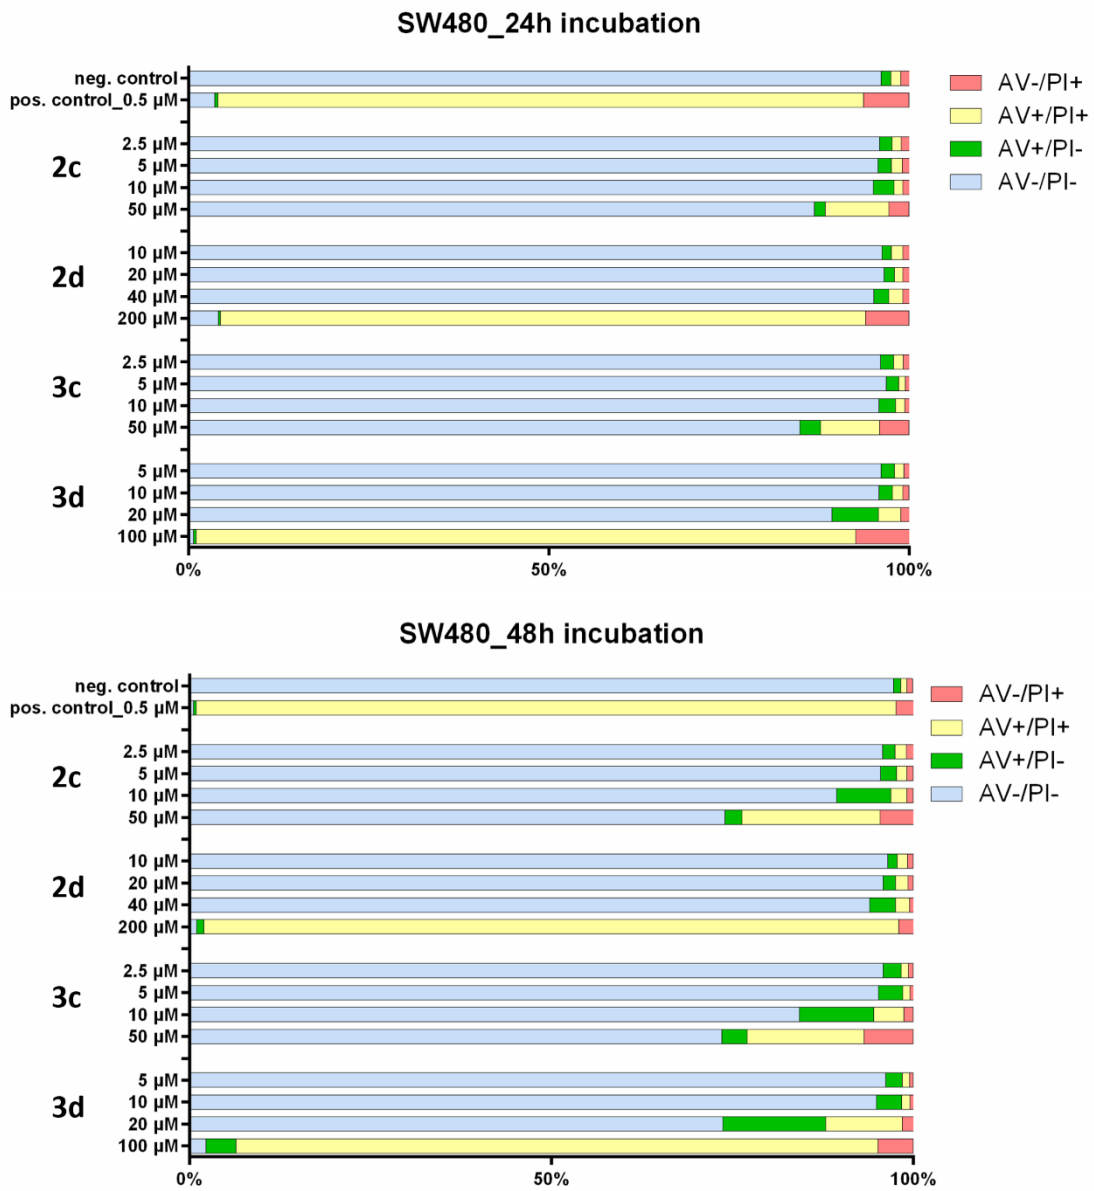

**Figure S64:** Apoptotic/Necrotic behavior of metalacycles **2c,d** and **3c,d** in SW480 cells after incubation for 24 h (top) and 48 h (bottom).
